# Supplementary material for: Nucleosome Patterns in Circulating Tumor DNA Reveal Transcriptional Regulation of Advanced Prostate Cancer Phenotypes
Source: Oxford University Press journal article supplement (doi:10.1158/2159-8290.cd-22-0692), 2022-11-18
Supplement: cd-22-0692_supp2.xlsx [file cd-22-0692_supp2.xlsx]

## Sheet: S2A
S2A	CUT&RUN nucleosome profilling post alignment sequencing statistics. Rep: Replicate number
	PDX line name		reference genome	H3K27ac			H3K4me1			H3K27me3
	LuCaP ID	Histopathologic Subtype	reference genome	Aligned filtered fragment count (After all filters)	#of nucletides covered >6X depth	#SEACR peaks (stringent)	Aligned filtered fragment count (After all filters)	#of nucletides covered >6X depth	#SEACR peaks (stringent)	Aligned filtered fragment count (After all filters)	#of nucletides covered >6X depth	#SEACR peaks (stringent)
1	35_Rep1	ARPC	HG38	12530690	3254510	2019	15155180	5713172	9013	13528138	1501947	NA
2	35CR_Rep1	ARPC	HG38	12605698	650991	3996	9048202	521609	31916	13363740	764195	NA
3	49_Rep1	NEPC	HG38	8112706	1984781	4989	13446930	5785888	36647	12987922	2121789	35813
3	49_Rep2	NEPC	HG38	15462114	1614651	5503	15497344	1454757	25328	17636386	1205736	36179
4	70_Rep1	ARPC	HG38	12240626	4588946	4610	13033480	9099989	10023	11896168	1770493	4794
5	70CR_Rep1	ARPC	HG38	11108616	395089	NA	11725062	519568	24528	11661748	598258	35659
5	70CR_Rep2	ARPC	HG38	16758286	5976678	8982	20905966	8698719	14996	NA	NA	NA
6	73_Rep1	ARPC	HG38	18586268	9052846	12599	17895244	10158734	28610	17307966	3093956	20640
6	73_Rep2	ARPC	HG38	13359086	3896451	5630	13172036	1541083	5683	11634622	917284	3403
7	73CR_Rep1	ARPC	HG38	12145408	7452015	11643	12529358	8888737	13594	12338850	3557882	7211
7	73CR_Rep2	ARPC	HG38	21002136	17233432	11115	14768788	4739109	24781	12571318	2070113	12533
8	77_Rep1	ARPC	HG38	11255898	19370695	7020	12229238	5124326	9857	14338522	9911836	7457
10	92_Rep1	ARPC	HG38	17825962	10204469	7877	15947684	11325241	35804	16389330	4248519	42495
11	93_Rep1	NEPC	HG38	15959498	6158995	7109	16815242	7295460	31835	15704804	3522071	18553
12	96_Rep1	ARPC	HG38	22164350	795017	NA	21896354	1718550	42109	23462590	690142	27655
13	96CR_Rep1	ARPC	HG38	19948300	466583	NA	16796862	1464710	23372	20143042	479592	NA
14	105_Rep1	ARPC	HG38	12881188	1607347	7199	12302938	1257117	64936	11388646	1695786	39518
15	105CR_Rep1	ARPC	HG38	10646774	1151933	NA	11647200	1249077	38515	10931084	1192422	27210
16	136_Rep1	ARPC	HG38	18300346	5830711	1610	16911588	9224921	6773	22719542	14628617	3132
16	136_Rep2	ARPC	HG38	NA	NA	NA	23794680	34067926	14477	20716416	22519527	4699
17	136CR_Rep1	ARPC	HG38	15345160	1101669	7093	15122396	2504993	39570	14905842	1436060	9798
18	145.1_Rep1	NEPC	HG38	40792716	10865085	7797	20190630	3904007	8852	NA	NA	NA
18	145.1_Rep2	NEPC	HG38	18001704	10106138	5829	15712912	7103156	17556	11488630	898453	4267
19	145.2_Rep1	NEPC	HG38	13920276	1231668	1807	18625312	9941234	6254	9259430	3464734	3551
19	145.2_Rep2	NEPC	HG38	14829856	10703591	3058	17597880	12606057	14412	13502110	5915499	5422
19	145.2_Rep3	NEPC	HG38	18452912	1378572	2775	18625312	3579546	10587	19780034	447315	16106
20	147_Rep1	ARPC	HG38	13149458	2471510	3524	15396886	5952060	17727	14437270	1397243	6268
20	147_Rep2	ARPC	HG38	NA	NA	NA	12066746	2628523	22509	12327518	1495173	18910
21	147CR_Rep1	ARPC	HG38	12102950	2769020	4817	13024634	7027675	9910	16071814	1040641	3432
21	147CR_Rep2	ARPC	HG38	13753228	1086878	8110	12189886	2344099	17899	14942354	998537	39096
22	167_Rep1	ARPC	HG38	11173216	1519183	3540	15870270	7335687	15996	NA	NA	NA
23	167CR_rep1	ARPC	HG38	13525684	3793098	6960	15693666	6940173	16782	15205216	1994470	8834
23	167CR_Rep2	ARPC	HG38	13349740	2087706	12947	13555810	8105411	38471	13072584	908690	41146
24	170.1_Rep1	ARPC	HG38	15426390	5531044	5562	15881746	1834832	20279	17097628	2957765	6871
24	170.1_Rep2	ARPC	HG38	11062800	2079929	5350	12983320	2213288	15545	12555150	1938602	5973
25	170.2_Rep2	ARPC	HG38	12263566	2581866	8438	12003214	1175054	49629	11413998	1620486	12338
26	170.3_Rep1	ARPC	HG38	21123698	2234353	6534	13288950	2029853	15932	10332448	2522476	2259
26	170.3_Rep2	ARPC	HG38	13820270	4330112	3170	11864022	1515227	12356	9820660	1838603	5419
26	170.3_rep3	ARPC	HG38	NA	NA	NA	11871640	1777864	18816	7719710	936617	273990
27	173.1_Rep1	NEPC	HG38	27071882	28613656	9496	18899810	20888994	10374	20397214	16729392	3580
27	173.1_Rep2	NEPC	HG38	20772174	2001694	NA	18902136	3464734	1894	NA	NA	NA
28	174.1_Rep1	ARPC	HG38	8941202	6985688	13333	11652108	1561798	18056	11791416	1611166	9591
28	174.1_Rep2	ARPC	HG38	12205962	11876040	17645	12318168	6488688	29444	11934686	1794156	15566
29	176_Rep1	ARLPC	HG38	14187782	4592379	9450	16740376	5166109	19078	16200620	9117245	7584
29	176_Rep2	ARLPC	HG38	17433442	7525019	18004	16309624	8447874	28515	16452518	6800424	17450
30	176CR_Rep1	ARLPC	HG38	24232630	28940995	9078	20768300	12016416	13145	16498120	13328362	6868
30	176CR_Rep2	ARLPC	HG38	NA	NA	NA	17529530	16882071	15561	16812582	15915490	9038
31	189.3_Rep1	ARPC	HG38	11907182	9630047	9625	12405398	5542657	19336	11648290	1065708	2061
31	189.3_Rep2	ARPC	HG38	6707248	2588257	NA	11193204	2641745	18298	10885564	646070	2024
32	189.4_Rep1	ARPC	HG38	11842468	2778969	8450	17125634	5295401	30395	12404656	1805450	3348
33	208.1_Rep1	NEPC	HG38	11170338	8252353	4869	16955696	7364663	4446	13802262	10799045	4625
33	208.1_Rep2	NEPC	HG38	13607528	4686775	6982	16725816	15776082	16741	11840972	7058575	5011

## Sheet: S2B
S2B	Estimated fragment size coefficient of variation across 47 lineage defining marker gene's gene body. For log2 fold change of variability, phenotypic subtype group means were compared.
	Log2FC	p-value	p-adjusted
TARP_GB_frag-cv	0.196195	0.133516	0.986106
AR_GB_frag-cv	0.166599	0.203021	0.986106
ASCL1_GB_frag-cv	-0.220831	0.0487315	0.986106
NKX3-1_GB_frag-cv	0.155483	0.203021	0.986106
TRPV6_GB_frag-cv	0.197242	0.114806	0.986106
TMPRSS2_GB_frag-cv	0.177961	0.0980258	0.986106
STEAP4_GB_frag-cv	0.150894	0.177503	0.986106
FKBP5_GB_frag-cv	0.134487	0.230791	0.986106
STEAP1_GB_frag-cv	0.183602	0.177503	0.986106
GATA2_GB_frag-cv	0.140965	0.177503	0.986106
SLC45A3_GB_frag-cv	0.118087	0.230791	0.986106
NKX2-1_GB_frag-cv	0.00380842	0.914425	0.992475
NRCAM_GB_frag-cv	-0.0341652	0.914425	0.992475
POU3F2_GB_frag-cv	-0.00541175	0.914425	0.992475
PROX1_GB_frag-cv	-0.0796977	0.640666	0.992475
SCG3_GB_frag-cv	0.0140019	0.914425	0.992475
SRRM3_GB_frag-cv	0.0617812	0.693123	0.992475
SNAP25_GB_frag-cv	-0.0686252	0.640666	0.992475
SOX2_GB_frag-cv	-0.016842	0.971359	0.992475
NEUROG2_GB_frag-cv	0.00983858	0.857733	0.992475
SRRM4_GB_frag-cv	-0.0530757	0.746814	0.992475
UNC13A_GB_frag-cv	0.0272542	0.693123	0.992475
XKR7_GB_frag-cv	-0.000744019	0.971359	0.992475
SEZ6_GB_frag-cv	0.0169981	0.746814	0.992475
NEUROD6_GB_frag-cv	0.111261	0.366773	0.992475
ACTL6B_GB_frag-cv	0.029376	0.590031	0.992475
ZNF536_GB_frag-cv	0.00469523	0.914425	0.992475
CHGB_GB_frag-cv	-0.0119771	0.801871	0.992475
CHRNB2_GB_frag-cv	0.0135068	0.746814	0.992475
CXCL17_GB_frag-cv	0.0237922	0.857733	0.992475
EZH2_GB_frag-cv	0.0104419	0.971359	0.992475
FOXA1_GB_frag-cv	0.0477348	0.590031	0.992475
GRP_GB_frag-cv	-0.0803432	0.49423	0.992475
HEPACAM2_GB_frag-cv	0.0505659	0.640666	0.992475
NEUROD4_GB_frag-cv	-0.0565504	0.801871	0.992475
INSM1_GB_frag-cv	-0.0205876	0.693123	0.992475
KLK3_GB_frag-cv	0.0931564	0.407007	0.992475
KRT15_GB_frag-cv	0.00965616	0.640666	0.992475
LHX2_GB_frag-cv	0.0487499	0.449412	0.992475
LHX3_GB_frag-cv	0.0623123	0.914425	0.992475
LMO3_GB_frag-cv	-0.121194	0.293836	0.992475
MYCL_GB_frag-cv	0.00727474	0.914425	0.992475
NCAM1_GB_frag-cv	-0.0732086	0.746814	0.992475
NEUROD1_GB_frag-cv	-0.0397796	0.640666	0.992475
ISL1_GB_frag-cv	-0.0890094	0.449412	0.992475
NEUROD2_GB_frag-cv	0.0814485	0.449412	0.992475
ELAVL4_GB_frag-cv	0.00223504	1	1

## Sheet: S2C
S2C	Estimated fragment size coefficient of variation across 47 lineage defining marker gene's transcription start site (TSS) +/-1 kb window. For log2 fold change of variability, phenotypic subtype group means were compared.
	Log2FC	p-value	p-adjusted
TARP_TSS_frag-cv	0.229524	0.177503	0.64174
LMO3_TSS_frag-cv	-0.136318	0.177503	0.64174
SLC45A3_TSS_frag-cv	0.110435	0.15445	0.64174
KLK3_TSS_frag-cv	0.200569	0.0980258	0.64174
GRP_TSS_frag-cv	-0.168573	0.114806	0.64174
GATA2_TSS_frag-cv	0.201873	0.070095	0.64174
FKBP5_TSS_frag-cv	0.11878	0.133516	0.64174
NKX2-1_TSS_frag-cv	-0.171067	0.0266173	0.64174
STEAP4_TSS_frag-cv	0.160543	0.133516	0.64174
TMPRSS2_TSS_frag-cv	0.234976	0.0401807	0.64174
TRPV6_TSS_frag-cv	0.212528	0.114806	0.64174
EZH2_TSS_frag-cv	0.101855	0.177503	0.64174
AR_TSS_frag-cv	0.209172	0.15445	0.64174
NKX3-1_TSS_frag-cv	0.137674	0.230791	0.774798
SNAP25_TSS_frag-cv	-0.0966878	0.293836	0.863144
MYCL_TSS_frag-cv	0.0777402	0.293836	0.863144
NCAM1_TSS_frag-cv	-0.111303	0.329138	0.909971
NRCAM_TSS_frag-cv	0.0499849	0.693123	1
POU3F2_TSS_frag-cv	0.0134561	0.971359	1
PROX1_TSS_frag-cv	-0.0368324	0.590031	1
SCG3_TSS_frag-cv	0.0225897	1	1
XKR7_TSS_frag-cv	-0.0830754	0.49423	1
UNC13A_TSS_frag-cv	-0.0485509	0.971359	1
SOX2_TSS_frag-cv	-0.00709596	1	1
SRRM4_TSS_frag-cv	-0.0705068	0.449412	1
STEAP1_TSS_frag-cv	0.0556877	0.640666	1
SEZ6_TSS_frag-cv	0.036383	0.541059	1
SRRM3_TSS_frag-cv	-0.0534012	0.590031	1
ACTL6B_TSS_frag-cv	-0.0337962	0.857733	1
NEUROD6_TSS_frag-cv	0.0996607	0.640666	1
ASCL1_TSS_frag-cv	-0.0625091	0.590031	1
CHGB_TSS_frag-cv	0.0152303	0.801871	1
CHRNB2_TSS_frag-cv	-0.0105387	1	1
CXCL17_TSS_frag-cv	0.0242304	0.914425	1
ELAVL4_TSS_frag-cv	-0.01641	0.801871	1
FOXA1_TSS_frag-cv	0.00400945	1	1
HEPACAM2_TSS_frag-cv	0.0233487	1	1
INSM1_TSS_frag-cv	-0.0544789	0.449412	1
ISL1_TSS_frag-cv	-0.0710298	0.407007	1
KRT15_TSS_frag-cv	0.0923915	0.541059	1
LHX2_TSS_frag-cv	0.0473856	0.801871	1
LHX3_TSS_frag-cv	0.129034	0.541059	1
NEUROD1_TSS_frag-cv	0.00143714	1	1
ZNF536_TSS_frag-cv	0.0189347	0.693123	1
NEUROD4_TSS_frag-cv	-0.00747071	0.914425	1
NEUROG2_TSS_frag-cv	0.0060967	0.857733	1
NEUROD2_TSS_frag-cv	0.015952	0.801871	1
