# Supplementary material for: Nucleosome Patterns in Circulating Tumor DNA Reveal Transcriptional Regulation of Advanced Prostate Cancer Phenotypes
Source: Oxford University Press journal article supplement (doi:10.1158/2159-8290.cd-22-0692), 2022-11-18
Supplement: cd-22-0692_supp3.xlsx [file cd-22-0692_supp3.xlsx]

## Sheet: 47Genes_GeneBody_NPS
Inter phenotype differential NPS score analysis
	Log2FC	p-value	p-adjusted	-Log10p-adj
GATA2	-0.18192	0.971359	0.971359	0.0126203
NRCAM	-0.0207278	0.971359	0.971359	0.0126203
EZH2	0.0240308	0.914425	0.955066	0.0199665
NKX3-1	0.0311867	0.857733	0.916214	0.0380029
KRT15	-0.0648928	0.801871	0.876464	0.0572661
NEUROD6	0.0604843	0.746814	0.83572	0.0779392
NKX2-1	0.32724	0.693123	0.794556	0.0998756
NEUROD2	0.0640029	0.640666	0.752782	0.123331
KLK3	-0.00132032	0.640666	0.752782	0.123331
ISL1	0.117496	0.590031	0.729775	0.136811
POU3F2	-0.237172	0.590031	0.729775	0.136811
SRRM4	0.0280138	0.590031	0.729775	0.136811
FOXA1	-0.524455	0.49423	0.663681	0.178041
NEUROD4	0.049311	0.49423	0.663681	0.178041
STEAP1	-0.137807	0.49423	0.663681	0.178041
NEUROG2	-0.0514696	0.449412	0.663681	0.178041
INSM1	-0.125269	0.49423	0.663681	0.178041
HEPACAM2	-0.205986	0.329138	0.51565	0.287645
ZNF536	0.0792496	0.329138	0.51565	0.287645
ACTL6B	0.0614488	0.293836	0.493225	0.306955
AR	-0.0806267	0.293836	0.493225	0.306955
SCG3	0.155135	0.230791	0.417199	0.379657
STEAP4	-0.207173	0.230791	0.417199	0.379657
ELAVL4	-0.18174	0.203021	0.397583	0.400573
PROX1	0.276468	0.15445	0.315616	0.500841
SOX2	-0.265398	0.15445	0.315616	0.500841
UNC13A	0.190627	0.114806	0.298821	0.524589
NCAM1	0.160458	0.133516	0.298821	0.524589
LHX3	0.326461	0.133516	0.298821	0.524589
TARP	0.33367	0.133516	0.298821	0.524589
LMO3	0.295621	0.0980258	0.271013	0.567011
SRRM3	0.213891	0.070095	0.205904	0.686335
SLC45A3	-0.333122	0.070095	0.205904	0.686335
CXCL17	-0.332467	0.0587029	0.197074	0.705371
TRPV6	-0.311589	0.0328093	0.118618	0.925849
LHX2	0.370996	0.0213368	0.083569	1.07795
FKBP5	-0.395907	0.0169944	0.0726123	1.13899
SEZ6	0.362589	0.0169944	0.0726123	1.13899
SNAP25	0.473191	0.0133489	0.0697108	1.1567
CHGB	0.560363	0.00798788	0.0469288	1.32856
GRP	0.36854	0.00453004	0.030416	1.5169
MYCL	0.445756	0.00453004	0.030416	1.5169
TMPRSS2	-0.514568	0.00241245	0.022677	1.64441
XKR7	0.467504	0.00241245	0.022677	1.64441
NEUROD1	0.474008	0.00171552	0.022677	1.64441
ASCL1	0.69326	0.000187635	0.00440942	2.35562
CHRNB2	0.571421	5.361e-05	0.00251967	2.59866

## Sheet: Differentially expressed TF
RNA seq results summary
ROW	ENTREZ	SYMBOL	GENENAME	CHROMOSOME_LOCATION	ARLPC_limma_logFC	ARLPC_limma_AveExpr	ARLPC_limma_t	ARLPC_limma_P.Value	ARLPC_limma_adj.P.Val	ARLPC_limma_B	ARLPC_limma up 3f FDR<0.05	ARLPC_limma down 3f FDR<0.05	NEPC_limma_logFC	NEPC_limma_AveExpr	NEPC_limma_t	NEPC_limma_P.Value	NEPC_limma_adj.P.Val	NEPC_limma_B	NEPC_limma up 3f FDR<0.05	NEPC_limma down 3f FDR<0.05	sum up 3f FDR<0.05	sum down 3f FDR<0.05
1	3236	HOXD10	homeobox D10	2q31.1	2.98486	-3.12381	3.3423	0.00110756	0.00693011	-1.01731	1	0	9.8903	-3.12381	37.1838	7.93543e-68	1.41474e-64	143.055	1	0	2	0
2	3237	HOXD11	homeobox D11	2q31.1	3.2399	-3.46435	4.47662	1.73464e-05	0.000212215	2.74558	1	0	8.34335	-3.46435	32.6962	1.04646e-61	9.77247e-59	128.806	1	0	2	0
9	3235	HOXD9	homeobox D9	2q31.1	2.96775	-2.88895	2.77503	0.00640152	0.0275791	-2.56355	1	0	8.00734	-2.88895	21.5492	3.99341e-43	7.45854e-41	87.4309	1	0	2	0
10	2113	ETS1	ETS proto-oncogene 1, transcription factor	11q24.3	6.05989	-0.88097	6.55248	1.47345e-09	4.88153e-08	11.5265	1	0	8.69693	-0.88097	21.1891	1.9946e-42	3.556e-40	86.0454	1	0	2	0
18	80319	CXXC4	CXXC finger protein 4	4q24	3.8118	0.641732	4.12039	6.9779e-05	0.000701762	1.30669	1	0	6.9908	0.641732	18.0126	5.84312e-36	5.56259e-34	71.3122	1	0	2	0
21	1750	DLX6	distal-less homeobox 6	7q21.3	4.25732	-1.47802	4.00148	0.000109183	0.0010314	1.01153	1	0	7.10334	-1.47802	17.0668	6.2909e-34	5.14045e-32	66.6276	1	0	2	0
22	144455	E2F7	E2F transcription factor 7	12q21.2	2.04069	4.33156	6.88848	2.75694e-10	1.0318e-08	12.9601	1	0	2.66079	4.33156	16.8104	2.27957e-33	1.74627e-31	65.3533	1	0	2	0
29	56938	ARNTL2	aryl hydrocarbon receptor nuclear translocator like 2	12p11.23	2.08513	1.4364	2.81044	0.00577687	0.0255821	-2.75834	1	0	4.86749	1.4364	15.9289	2.0282e-31	1.30839e-29	60.9398	1	0	2	0
40	5457	POU4F1	POU class 4 homeobox 1	13q31.1	4.77342	-2.06451	4.3734	2.61642e-05	0.000302005	2.30689	1	0	6.46021	-2.06451	13.0822	7.18225e-25	2.71913e-23	46.0038	1	0	2	0
41	3231	HOXD1	homeobox D1	2q31.1	5.53583	-2.67184	6.73965	5.81714e-10	2.02269e-08	12.4182	1	0	5.71639	-2.67184	12.9519	1.45877e-24	5.35731e-23	45.2904	1	0	2	0
46	3239	HOXD13	homeobox D13	2q31.1	3.09572	-0.629849	2.82127	0.00559726	0.0249469	-2.55624	1	0	5.6435	-0.629849	12.5421	1.36469e-23	4.57485e-22	43.091	1	0	2	0
50	55502	HES6	hes family bHLH transcription factor 6	2q37.3	2.37188	4.94547	4.15481	6.11996e-05	0.000624772	1.0115	1	0	3.54641	4.94547	11.8035	7.87305e-22	2.25071e-20	38.8202	1	0	2	0
54	7003	TEAD1	TEA domain transcription factor 1	11p15.3	1.61121	6.04343	3.27564	0.00137741	0.00822545	-1.95587	1	0	2.86718	6.04343	11.4996	4.20795e-21	1.11829e-19	37.0882	1	0	2	0
55	2649	NR6A1	nuclear receptor subfamily 6 group A member 1	9q33.3	1.90095	3.0881	4.94161	2.53159e-06	4.03963e-05	4.2016	1	0	2.3678	3.0881	11.4282	6.23999e-21	1.62946e-19	36.8928	1	0	2	0
61	8609	KLF7	Kruppel like factor 7	2q33.3	2.54289	3.98884	5.78619	5.83063e-08	1.39785e-06	7.73324	1	0	2.66877	3.98884	10.9593	8.32669e-20	1.94398e-18	34.2338	1	0	2	0
62	7552	ZNF711	zinc finger protein 711	Xq21.1	5.80659	0.97234	5.85216	4.28545e-08	1.06209e-06	8.13905	1	0	6.55056	0.97234	10.9457	8.97652e-20	2.08824e-18	34.311	1	0	2	0
63	51621	KLF13	Kruppel like factor 13	15q13.3	2.4333	5.94788	5.72192	7.8561e-08	1.839e-06	7.36793	1	0	2.44514	5.94788	10.9106	1.09024e-19	2.51242e-18	33.8532	1	0	2	0
66	3213	HOXB3	homeobox B3	17q21.32	6.197	2.64129	8.08992	5.40412e-13	3.07189e-11	19.0641	1	0	5.18545	2.64129	10.5721	7.08375e-19	1.48736e-17	32.2009	1	0	2	0
68	93986	FOXP2	forkhead box P2	7q31.1	5.05629	-1.55002	4.15614	6.08897e-05	0.000621932	1.47195	1	0	6.1678	-1.55002	10.5156	9.68195e-19	2.00288e-17	32.0469	1	0	2	0
71	80312	TET1	tet methylcytosine dioxygenase 1	10q21.3	2.58089	2.86619	5.57793	1.52266e-07	3.34388e-06	6.87652	1	0	2.63224	2.86619	9.91172	2.71569e-17	4.80663e-16	28.5766	1	0	2	0
72	3224	HOXC8	homeobox C8	12q13.13	3.82878	-1.45509	3.78159	0.000244087	0.00201034	0.252174	1	0	4.83981	-1.45509	9.8862	3.12575e-17	5.47803e-16	28.656	1	0	2	0
77	9839	ZEB2	zinc finger E-box binding homeobox 2	2q22.3	5.29191	-3.26657	5.89098	3.57253e-08	9.06351e-07	8.49092	1	0	4.719	-3.26657	9.68848	9.28094e-17	1.518e-15	27.6154	1	0	2	0
78	3226	HOXC10	homeobox C10	12q13.13	6.51586	-0.82362	8.6168	3.20954e-14	2.12643e-12	21.901	1	0	5.23605	-0.82362	9.67863	9.79755e-17	1.5985e-15	27.4958	1	0	2	0
79	6304	SATB1	SATB homeobox 1	3p24.3	4.40718	2.36349	4.60597	1.02763e-05	0.000134952	2.82805	1	0	5.40439	2.36349	9.64299	1.19177e-16	1.91886e-15	27.1272	1	0	2	0
82	7762	ZNF215	zinc finger protein 215	11p15.4	6.51298	-2.07902	6.34274	4.11841e-09	1.27391e-07	10.5375	1	0	5.93794	-2.07902	9.56863	1.79318e-16	2.83825e-15	26.9295	1	0	2	0
89	4211	MEIS1	Meis homeobox 1	2p14	2.44692	1.33781	3.15045	0.00205705	0.0113668	-1.90483	1	0	3.52684	1.33781	9.26602	9.4161e-16	1.37908e-14	25.1576	1	0	2	0
91	3215	HOXB5	homeobox B5	17q21.32	7.04595	0.0671932	8.09947	5.13655e-13	2.92828e-11	19.1635	1	0	5.6272	0.0671932	9.09748	2.36363e-15	3.2828e-14	24.2949	1	0	2	0
93	2299	FOXI1	forkhead box I1	5q35.1	3.07593	-4.09157	2.83285	0.00541088	0.0242988	-2.41638	1	0	4.82503	-4.09157	9.07198	2.71617e-15	3.74327e-14	24.3111	1	0	2	0
94	344191	EVX2	even-skipped homeobox 2	2q31.1	3.41383	-3.69077	3.99914	0.000110137	0.00103791	1.05662	1	0	3.8564	-3.69077	8.96088	4.97338e-15	6.64599e-14	23.7209	1	0	2	0
97	3218	HOXB8	homeobox B8	17q21.32	7.90317	-1.54728	9.07924	2.6107e-15	1.96917e-13	24.3523	1	0	5.89908	-1.54728	8.7281	1.75871e-14	2.20807e-13	22.4215	1	0	2	0
108	83482	SCRT1	scratch family transcriptional repressor 1	8q24.3	2.1334	-1.75834	2.55902	0.0117362	0.0440157	-3.12674	1	0	3.254	-1.75834	8.09029	5.39344e-13	5.64713e-12	19.1131	1	0	2	0
110	3212	HOXB2	homeobox B2	17q21.32	8.51323	-0.120723	9.72222	7.70914e-17	7.03181e-15	27.7851	1	0	5.4816	-0.120723	8.0141	8.08305e-13	8.27763e-12	18.5519	1	0	2	0
112	6095	RORA	RAR related orphan receptor A	15q22.2	1.65603	3.7382	3.43483	0.000814165	0.00541424	-1.29448	1	0	2.07347	3.7382	7.99672	8.8634e-13	9.03901e-12	18.2371	1	0	2	0
115	255877	BCL6B	BCL6B transcription repressor	17p13.1	3.03187	-0.808591	3.73756	0.000285681	0.0022961	0.0896476	1	0	3.37373	-0.808591	7.95127	1.12753e-12	1.12701e-11	18.353	1	0	2	0
122	59269	HIVEP3	human immunodeficiency virus type I enhancer binding protein 3	1p34.2	2.35561	2.6085	4.8074	4.4649e-06	6.68405e-05	3.66667	1	0	2.1669	2.6085	7.57402	8.183e-12	7.27456e-11	16.142	1	0	2	0
123	2306	FOXD2	forkhead box D2	1p33	2.54791	0.622146	4.55207	1.27964e-05	0.000163061	2.86815	1	0	2.40822	0.622146	7.56576	8.5434e-12	7.57778e-11	16.2974	1	0	2	0
126	402381	SOHLH1	spermatogenesis and oogenesis specific basic helix-loop-helix 1	9q34.3	6.63047	-3.5229	10.0846	1.04685e-17	1.04744e-15	29.4903	1	0	3.31403	-3.5229	7.26465	4.06137e-11	3.28173e-10	14.9304	1	0	2	0
127	3217	HOXB7	homeobox B7	17q21.32	5.60679	1.24632	7.6419	5.74106e-12	2.8007e-10	16.7906	1	0	3.81313	1.24632	7.19634	5.76673e-11	4.56198e-10	14.3247	1	0	2	0
130	79755	ZNF750	zinc finger protein 750	17q25.3	3.81567	0.577112	5.74078	7.19931e-08	1.70514e-06	7.72947	1	0	3.06196	0.577112	7.17435	6.45427e-11	5.05288e-10	14.2915	1	0	2	0
134	2000	ELF4	E74 like ETS transcription factor 4	Xq26.1	2.75365	3.71724	4.38561	2.49306e-05	0.000289813	1.90898	1	0	2.55271	3.71724	7.0963	9.61514e-11	7.3058e-10	13.5782	1	0	2	0
136	4773	NFATC2	nuclear factor of activated T cells 2	20q13.2	2.34843	2.34178	3.36215	0.00103733	0.00657203	-1.40841	1	0	2.70812	2.34178	7.08713	1.00755e-10	7.6172e-10	13.6837	1	0	2	0
137	11281	POU6F2	POU class 6 homeobox 2	7p14.1	7.55909	-2.54782	9.73191	7.30895e-17	6.72938e-15	27.7991	1	0	4.37842	-2.54782	7.06233	1.14311e-10	8.56282e-10	13.8958	1	0	2	0
141	2908	NR3C1	nuclear receptor subfamily 3 group C member 1	5q31.3	5.09746	3.27193	6.05609	1.63654e-08	4.44144e-07	8.9525	1	0	3.65951	3.27193	6.91969	2.35539e-10	1.68336e-09	12.7378	1	0	2	0
148	3659	IRF1	interferon regulatory factor 1	5q31.1	1.63738	3.02568	3.83904	0.000198405	0.00169761	0.0667635	1	0	1.60673	3.02568	6.7307	6.08287e-10	4.06998e-09	11.8678	1	0	2	0
152	64067	NPAS3	neuronal PAS domain protein 3	14q13.1	2.97372	-2.04111	2.82749	0.00549637	0.0245926	-2.49375	1	0	3.5151	-2.04111	6.62445	1.03204e-09	6.66203e-09	11.7321	1	0	2	0
153	3214	HOXB4	homeobox B4	17q21.32	6.29772	-0.660643	6.83602	3.58959e-10	1.30847e-08	12.8273	1	0	4.54576	-0.660643	6.5794	1.28998e-09	8.22958e-09	11.4198	1	0	2	0
155	6776	STAT5A	signal transducer and activator of transcription 5A	17q21.2	2.18945	3.07287	4.58979	1.09776e-05	0.000143234	2.74822	1	0	1.83164	3.07287	6.5595	1.42327e-09	9.03e-09	11.003	1	0	2	0
156	93349	SP140L	SP140 nuclear body protein like	2q37.1	4.12814	1.78424	5.61904	1.26166e-07	2.82447e-06	7.08835	1	0	3.17339	1.78424	6.54067	1.56187e-09	9.84881e-09	11.0609	1	0	2	0
162	10716	TBR1	T-box, brain 1	2q24.2	2.4937	-2.93153	3.80005	0.000228411	0.00189723	0.394078	1	0	2.1754	-2.93153	6.42489	2.75843e-09	1.67065e-08	10.8323	1	0	2	0
169	7761	ZNF214	zinc finger protein 214	11p15.4	3.73542	-0.164538	3.33479	0.00113527	0.00704998	-1.24138	1	0	3.72033	-0.164538	6.02884	1.86293e-08	9.97924e-08	8.81964	1	0	2	0
170	127665	ZNF648	zinc finger protein 648	1q25.3	3.50877	-3.82813	4.55577	1.26056e-05	0.000161048	3.03602	1	0	2.40498	-3.82813	6.01508	1.98869e-08	1.06065e-07	8.91895	1	0	2	0
173	2118	ETV4	ETS variant 4	17q21.31	4.11403	0.124623	5.16604	9.60348e-07	1.71525e-05	5.29478	1	0	3.10246	0.124623	5.95005	2.70522e-08	1.41246e-07	8.46818	1	0	2	0
180	9572	NR1D1	nuclear receptor subfamily 1 group D member 1	17q21.1	1.9018	3.45896	3.61397	0.000441339	0.00328467	-0.740558	1	0	1.73459	3.45896	5.76127	6.54653e-08	3.19522e-07	7.24161	1	0	2	0
182	139324	HDX	highly divergent homeobox	Xq21.1	2.54251	0.986122	2.57561	0.0112164	0.0425219	-3.35573	1	0	2.98324	0.986122	5.73195	7.49974e-08	3.62527e-07	7.3744	1	0	2	0
183	22806	IKZF3	IKAROS family zinc finger 3	17q12-q21.1	3.82848	0.813528	6.38899	3.2873e-09	1.02655e-07	10.6631	1	0	2.4327	0.813528	5.7172	8.02953e-08	3.86328e-07	7.32614	1	0	2	0
187	864	RUNX3	RUNX family transcription factor 3	1p36.11	5.33552	-2.8527	4.21383	4.87894e-05	0.000516356	1.74487	1	0	4.14635	-2.8527	5.67746	9.64627e-08	4.58157e-07	7.36145	1	0	2	0
188	51513	ETV7	ETS variant 7	6p21.31	2.66837	0.0778038	3.91048	0.000152884	0.00135972	0.629549	1	0	2.21705	0.0778038	5.67671	9.67953e-08	4.59514e-07	7.27578	1	0	2	0
191	3198	HOXA1	homeobox A1	7p15.2	2.72814	-1.0561	3.22641	0.00161481	0.00931962	-1.45876	1	0	2.55172	-1.0561	5.57771	1.52414e-07	7.00326e-07	6.87245	1	0	2	0
196	3229	HOXC13	homeobox C13	12q13.13	5.21709	-1.02199	6.62613	1.02349e-09	3.46661e-08	11.8609	1	0	3.1436	-1.02199	5.50193	2.15135e-07	9.64348e-07	6.51957	1	0	2	0
202	11262	SP140	SP140 nuclear body protein	2q37.1	3.25491	-1.74546	4.29672	3.53634e-05	0.000391372	2.05669	1	0	2.29452	-1.74546	5.39232	3.52556e-07	1.52694e-06	6.11669	1	0	2	0
209	79192	IRX1	iroquois homeobox 1	5p15.33	2.25726	-4.70958	3.39719	0.000923404	0.00596865	-0.85579	1	0	1.7383	-4.70958	5.17344	9.29724e-07	3.73776e-06	5.20583	1	0	2	0
210	389114	ZNF662	zinc finger protein 662	3p22.1	6.91219	-0.984133	6.40186	3.08716e-09	9.70878e-08	10.7388	1	0	4.51486	-0.984133	5.164	9.68949e-07	3.88511e-06	5.03925	1	0	2	0
220	861	RUNX1	RUNX family transcription factor 1	21q22.12	5.64338	3.24627	6.77613	4.84707e-10	1.71581e-08	12.3764	1	0	2.64496	3.24627	4.67822	7.63992e-06	2.60251e-05	2.64764	1	0	2	0
224	3087	HHEX	hematopoietically expressed homeobox	10q23.33	3.55014	0.510822	3.80541	0.000224045	0.00186492	0.110125	1	0	2.77831	0.510822	4.61779	9.79177e-06	3.27022e-05	2.72391	1	0	2	0
233	7579	ZSCAN20	zinc finger and SCAN domain containing 20	1p35.1	2.4812	1.29726	2.61163	0.0101582	0.0394092	-3.34643	1	0	2.42259	1.29726	4.49797	1.59211e-05	5.13365e-05	2.17711	1	0	2	0
235	169792	GLIS3	GLIS family zinc finger 3	9p24.2	3.11465	1.37358	3.60066	0.000462222	0.00341289	-0.607523	1	0	2.42438	1.37358	4.40619	2.29764e-05	7.17273e-05	1.84701	1	0	2	0
242	2308	FOXO1	forkhead box O1	13q14.11	2.85835	2.16082	4.52708	1.41582e-05	0.000178442	2.57213	1	0	1.8319	2.16082	4.31236	3.32658e-05	0.000100598	1.42131	1	0	2	0
244	1748	DLX4	distal-less homeobox 4	17q21.33	3.8408	-0.481444	4.69045	7.26395e-06	0.000100674	3.45236	1	0	2.23093	-0.481444	4.24118	4.38935e-05	0.000129716	1.45031	1	0	2	0
252	5359	PLSCR1	phospholipid scramblase 1	3q24	3.66851	3.73245	4.96964	2.24604e-06	3.63125e-05	4.18109	1	0	1.92155	3.73245	4.13414	6.62211e-05	0.000189006	0.518649	1	0	2	0
260	6775	STAT4	signal transducer and activator of transcription 4	2q32.2-q32.3	4.70446	-2.26575	7.40909	1.92785e-11	8.67132e-10	15.6621	1	0	1.67589	-2.26575	3.98098	0.000117837	0.000321025	0.594983	1	0	2	0
263	90649	ZNF486	zinc finger protein 486	19p12	3.58413	0.318227	2.57469	0.0112445	0.0426036	-3.35306	1	0	3.15843	0.318227	3.85294	0.000188643	0.000493594	-0.0570958	1	0	2	0
267	3216	HOXB6	homeobox B6	17q21.32	6.73683	0.658269	7.99087	9.14234e-13	5.05043e-11	18.5805	1	0	2.83597	0.658269	3.7263	0.000297351	0.00074446	-0.489441	1	0	2	0
277	3199	HOXA2	homeobox A2	7p15.2	2.69865	-1.326	2.70595	0.00780037	0.0321777	-2.84504	1	0	1.93506	-1.326	3.45667	0.000756482	0.00174472	-1.19475	1	0	2	0
280	23414	ZFPM2	zinc finger protein, FOG family member 2	8q23.1	5.8669	-3.32246	5.92298	3.07341e-08	7.92018e-07	8.64165	1	0	2.25447	-3.32246	3.36549	0.00102591	0.00230381	-1.42418	1	0	2	0
284	3221	HOXC4	homeobox C4	12q13.13	3.10421	1.66291	3.84882	0.000191482	0.001647	0.145745	1	0	1.81153	1.66291	3.22469	0.00162378	0.00348685	-2.16902	1	0	2	0
286	11107	PRDM5	PR/SET domain 5	4q27	3.67648	0.951345	4.19209	5.30499e-05	0.00055309	1.37167	1	0	2.04275	0.951345	3.18283	0.00185627	0.00393507	-2.22762	1	0	2	0
287	3219	HOXB9	homeobox B9	17q21.32	4.99136	0.120369	5.38221	3.68891e-07	7.38196e-06	6.15988	1	0	2.33854	0.120369	3.15087	0.0020543	0.00431985	-2.17366	1	0	2	0
297	8626	TP63	tumor protein p63	3q28	3.9351	-1.8596	3.53903	0.000571694	0.00405185	-0.512579	1	0	1.93209	-1.8596	2.90455	0.00437749	0.00865741	-2.76102	1	0	2	0
304	64344	HIF3A	hypoxia inducible factor 3 subunit alpha	19q13.32	4.56002	-2.21105	4.16272	5.93766e-05	0.000609333	1.52236	1	0	1.89481	-2.21105	2.64791	0.0091842	0.0168659	-3.42961	1	0	2	0
306	63951	DMRTA1	DMRT like family A1	9p21.3	2.79917	-0.210479	2.67877	0.0084231	0.0341222	-3.06549	1	0	1.71187	-0.210479	2.63508	0.00951858	0.0174131	-3.59466	1	0	2	0
311	3227	HOXC11	homeobox C11	12q13.13	5.2334	-0.747646	5.15719	9.98214e-07	1.77319e-05	5.21432	1	0	2.0646	-0.747646	2.48319	0.0143984	0.0252204	-3.89855	1	0	2	0
3	2313	FLI1	Fli-1 proto-oncogene, ETS transcription factor	11q24.3	-0.67666	-3.60998	-0.970692	0.333649	0.501952	-5.72949	0	0	7.45703	-3.60998	25.9932	3.36101e-51	1.22061e-48	105.122	1	0	1	0
4	266743	NPAS4	neuronal PAS domain protein 4	11q13.2	-0.13573	-3.60208	-0.200301	0.841583	0.903602	-6.15111	0	0	7.09347	-3.60208	25.8627	5.62205e-51	1.93428e-48	104.642	1	0	1	0
5	6657	SOX2	SRY-box 2	3q26.33	0.623815	0.141163	0.470769	0.638658	0.767964	-6.04762	0	0	9.2014	0.141163	24.7487	4.89546e-49	1.41184e-46	101.092	1	0	1	0
6	5454	POU3F2	POU class 3 homeobox 2	6q16.1	-1.73976	-2.11309	-1.74436	0.083649	0.192134	-4.72837	0	0	7.80788	-2.11309	23.5067	8.37654e-47	2.02805e-44	95.834	1	0	1	0
7	9705	ST18	ST18 C2H2C-type zinc finger transcription factor	8q11.23	-0.857565	-0.359923	-0.619354	0.536854	0.686628	-5.96909	0	0	9.04236	-0.359923	23.4142	1.23741e-46	2.95938e-44	95.6432	1	0	1	0
8	3642	INSM1	INSM transcriptional repressor 1	20p11.23	-2.16582	-0.463822	-1.33366	0.184835	0.338577	-5.31563	0	0	10.5734	-0.463822	23.3018	1.9905e-46	4.53904e-44	95.1854	1	0	1	0
11	23040	MYT1L	myelin transcription factor 1 like	2p25.3	1.7299	-3.14432	1.38888	0.167434	0.315574	-5.23418	0	0	8.60232	-3.14432	20.7389	1.52377e-41	2.46964e-39	83.9143	1	0	1	0
12	728116	ZBTB8B	zinc finger and BTB domain containing 8B	1p35.1	-2.96746	-0.0845032	-2.87346	0.004801	0.0220653	-2.31674	0	1	6.30076	-0.0845032	20.2143	1.68216e-40	2.46186e-38	81.6422	1	0	1	1
13	429	ASCL1	achaete-scute family bHLH transcription factor 1	12q23.2	-3.08331	-0.00589436	-1.64314	0.102965	0.222439	-4.88395	0	0	10.5622	-0.00589436	20.1538	2.22353e-40	3.15982e-38	81.4134	1	0	1	0
14	7080	NKX2-1	NK2 homeobox 1	14q13.3	-4.38348	0.641987	-3.24319	0.00152993	0.0089376	-1.31318	0	1	7.3389	0.641987	19.1676	2.24498e-38	2.68453e-36	76.8344	1	0	1	1
15	6474	SHOX2	short stature homeobox 2	3q25.32	-0.971472	-0.4427	-0.86119	0.390846	0.557324	-5.79705	0	0	6.4587	-0.4427	19.0324	4.26721e-38	4.95173e-36	76.1669	1	0	1	0
16	5629	PROX1	prospero homeobox 1	1q32.3	-3.80867	0.238405	-2.25429	0.0259867	0.0809631	-3.7768	0	0	8.84646	0.238405	18.2788	1.5969e-36	1.60599e-34	72.6054	1	0	1	0
17	5079	PAX5	paired box 5	9p13.2	-0.233346	-1.59212	-0.167525	0.867238	0.919415	-6.14288	0	0	7.84851	-1.59212	18.1825	2.5506e-36	2.52625e-34	72.109	1	0	1	0
19	3234	HOXD8	homeobox D8	2q31.1	1.51846	-1.25653	1.00763	0.315655	0.483353	-5.67264	0	0	8.04248	-1.25653	17.9767	6.96296e-36	6.56494e-34	71.1323	1	0	1	0
20	3232	HOXD3	homeobox D3	2q31.1	0.412081	-2.52978	0.352191	0.725311	0.829731	-6.09706	0	0	7.26835	-2.52978	17.5141	6.7864e-35	5.88806e-33	68.7905	1	0	1	0
23	79698	ZMAT4	zinc finger matrin-type 4	8p11.21	-2.87156	-1.17249	-2.13073	0.0351461	0.101555	-4.02804	0	0	7.17654	-1.17249	16.7123	3.74004e-33	2.821e-31	64.8931	1	0	1	0
24	3233	HOXD4	homeobox D4	2q31.1	1.37244	-1.73747	1.04146	0.299749	0.467205	-5.6333	0	0	7.31063	-1.73747	16.6681	4.6767e-33	3.47404e-31	64.6495	1	0	1	0
25	58158	NEUROD4	neuronal differentiation 4	12q13.2	-1.23812	-3.73404	-1.01827	0.310591	0.478288	-5.6838	0	0	7.62799	-3.73404	16.4072	1.75553e-32	1.25648e-30	63.2855	1	0	1	0
26	4760	NEUROD1	neuronal differentiation 1	2q31.3	-0.761402	-4.23681	-0.743422	0.458675	0.619559	-5.91644	0	0	7.1068	-4.23681	16.3497	2.3533e-32	1.65414e-30	62.9073	1	0	1	0
27	253639	ZNF620	zinc finger protein 620	3p22.1	0.555464	2.97543	1.50942	0.133813	0.268846	-5.51045	0	0	2.49752	2.97543	16.1811	5.56296e-32	3.72339e-30	62.2142	1	0	1	0
28	2119	ETV5	ETS variant 5	3q27.2	-3.50119	-0.335188	-2.68052	0.00838175	0.0339968	-2.81242	0	1	6.64492	-0.335188	15.9817	1.54576e-31	1.01384e-29	61.2074	1	0	1	1
30	118738	ZNF488	zinc finger protein 488	10q11.22	0.93956	-1.20127	0.810552	0.419223	0.584112	-5.83918	0	0	6.13689	-1.20127	15.4613	2.27695e-30	1.36973e-28	58.5256	1	0	1	0
31	5452	POU2F2	POU class 2 homeobox 2	19q13.2	-0.569716	1.35705	-0.708087	0.48026	0.638795	-5.98964	0	0	3.97667	1.35705	15.4606	2.28496e-30	1.37035e-28	58.539	1	0	1	0
32	3167	HMX2	H6 family homeobox 2	10q26.13	1.84138	-3.67682	2.26594	0.0252419	0.0791523	-3.73485	0	0	5.71299	-3.67682	15.3412	4.2543e-30	2.44666e-28	57.7043	1	0	1	0
33	2516	NR5A1	nuclear receptor subfamily 5 group A member 1	9q33.3	-0.64611	-3.39621	-0.751193	0.454003	0.614877	-5.89574	0	0	5.4943	-3.39621	14.523	3.13882e-28	1.57834e-26	53.5503	1	0	1	0
34	285349	ZNF660	zinc finger protein 660	3p21.31	1.16278	-0.30426	1.15051	0.252214	0.4169	-5.54697	0	0	5.24592	-0.30426	14.3039	1.00479e-27	4.85343e-26	52.5012	1	0	1	0
35	340784	HMX3	H6 family homeobox 3	10q26.13	-0.827175	-3.80925	-0.825321	0.410823	0.576504	-5.85467	0	0	6.30603	-3.80925	13.7456	1.99218e-26	8.74018e-25	49.4644	1	0	1	0
36	23462	HEY1	hes related family bHLH transcription factor with YRPW motif 1	8q21.13	-0.208303	1.47324	-0.212444	0.83212	0.897767	-6.23388	0	0	4.33734	1.47324	13.7335	2.12573e-26	9.26394e-25	49.4639	1	0	1	0
37	349075	ZNF713	zinc finger protein 713	7p11.2	0.335801	3.41983	0.957769	0.340099	0.50867	-6.22849	0	0	2.06151	3.41983	13.689	2.7004e-26	1.17163e-24	49.1712	1	0	1	0
38	2016	EMX1	empty spiracles homeobox 1	2p13.2	-0.287366	-2.35491	-0.286147	0.775257	0.861636	-6.11663	0	0	5.43538	-2.35491	13.5553	5.55097e-26	2.34612e-24	48.5128	1	0	1	0
39	4661	MYT1	myelin transcription factor 1	20q13.33	-2.84037	1.06044	-1.70767	0.090277	0.202681	-4.76807	0	0	6.26605	1.06044	13.3591	1.60141e-25	6.5156e-24	47.4488	1	0	1	0
42	6671	SP4	Sp4 transcription factor	7p15.3	0.0321931	3.87269	0.0748941	0.940423	0.963897	-6.72067	0	0	2.30614	3.87269	12.9199	1.7361e-24	6.32836e-23	44.9839	1	0	1	0
43	27023	FOXB1	forkhead box B1	15q22.2	-1.1592	-3.87048	-1.07692	0.283671	0.450415	-5.62506	0	0	6.16128	-3.87048	12.7742	3.84034e-24	1.36436e-22	44.3137	1	0	1	0
44	3175	ONECUT1	one cut homeobox 1	15q21.3	-2.0333	-2.73578	-1.99478	0.0483263	0.128331	-4.28943	0	0	5.46423	-2.73578	12.6101	9.41008e-24	3.22624e-22	43.4486	1	0	1	0
45	100132074	FOXO6	forkhead box O6	1p34.2	0.979465	2.61344	1.57659	0.117516	0.244754	-5.39321	0	0	3.26071	2.61344	12.5685	1.18146e-23	4.00166e-22	43.1393	1	0	1	0
47	4093	SMAD9	SMAD family member 9	13q13.3	0.294529	3.80366	0.379126	0.705263	0.815085	-6.64745	0	0	3.80296	3.80366	12.2503	6.75194e-23	2.1186e-21	41.3147	1	0	1	0
48	50674	NEUROG3	neurogenin 3	10q22.1	0.456488	-3.84575	0.341742	0.733141	0.835132	-6.10817	0	0	6.78659	-3.84575	12.2192	8.00693e-23	2.49641e-21	41.3426	1	0	1	0
49	5453	POU3F1	POU class 3 homeobox 1	1p34.3	-0.597814	-3.09245	-0.698891	0.485969	0.643694	-5.93005	0	0	4.72119	-3.09245	11.9154	4.25169e-22	1.25762e-20	39.6746	1	0	1	0
51	80034	CSRNP3	cysteine and serine rich nuclear protein 3	2q24.3	2.53625	-0.139343	1.87666	0.0629863	0.155969	-4.61238	0	0	5.89751	-0.139343	11.7414	1.10899e-21	3.12925e-20	38.7137	1	0	1	0
52	9355	LHX2	LIM homeobox 2	9q33.3	2.54041	0.518672	2.14674	0.0338209	0.0988025	-4.1865	0	0	5.44502	0.518672	11.7041	1.36191e-21	3.81548e-20	38.4919	1	0	1	0
53	3670	ISL1	ISL LIM homeobox 1	5q11.1	-2.23851	-2.83268	-1.81937	0.0713407	0.171022	-4.60541	0	0	5.88796	-2.83268	11.5361	3.43987e-21	9.27912e-20	37.6403	1	0	1	0
56	6258	RXRG	retinoid X receptor gamma	1q23.3	0.871559	-2.90272	0.721488	0.472009	0.631847	-5.90479	0	0	5.7685	-2.90272	11.3973	7.39915e-21	1.91937e-19	36.8853	1	0	1	0
57	8193	DPF1	double PHD fingers 1	19q13.2	0.256666	1.22629	0.351203	0.72605	0.830334	-6.24708	0	0	3.12197	1.22629	11.284	1.38333e-20	3.50498e-19	36.2182	1	0	1	0
58	128553	TSHZ2	teashirt zinc finger homeobox 2	20q13.2	-0.841184	1.41921	-0.66183	0.509346	0.66395	-6.00293	0	0	4.34971	1.41921	11.2018	2.17951e-20	5.36965e-19	35.7134	1	0	1	0
59	5990	RFX2	regulatory factor X2	19p13.3	1.12507	2.59908	1.81075	0.0726744	0.173216	-5.01251	0	0	2.96711	2.59908	11.0625	4.70667e-20	1.12564e-18	34.9126	1	0	1	0
60	6297	SALL2	spalt like transcription factor 2	14q11.2	-0.192439	4.09732	-0.326936	0.744284	0.842469	-6.61791	0	0	2.52323	4.09732	10.9779	7.51461e-20	1.76068e-18	34.3448	1	0	1	0
64	26147	PHF19	PHD finger protein 19	9q33.2	1.45469	5.44147	3.49602	0.000662111	0.00458498	-1.25114	0	0	2.31951	5.44147	10.9012	1.14801e-19	2.63935e-18	33.8183	1	0	1	0
65	4212	MEIS2	Meis homeobox 2	15q14	1.37647	-1.43859	0.754436	0.452061	0.613268	-5.88285	0	0	6.6424	-1.43859	10.8852	1.25421e-19	2.86671e-18	34.0474	1	0	1	0
67	25925	ZNF521	zinc finger protein 521	18q11.2	-0.83401	-2.92647	-0.652814	0.515121	0.668036	-5.96474	0	0	5.79463	-2.92647	10.5534	7.85649e-19	1.64433e-17	32.2944	1	0	1	0
69	3170	FOXA2	forkhead box A2	20p11.21	-3.04044	-1.23661	-1.60632	0.110826	0.234531	-4.94896	0	0	6.76863	-1.23661	10.4686	1.2555e-18	2.55941e-17	31.7648	1	0	1	0
70	6925	TCF4	transcription factor 4	18q21.2	2.98233	0.9097	1.99994	0.0477589	0.127134	-4.50352	0	0	6.08598	0.9097	10.4124	1.71267e-18	3.40987e-17	31.3933	1	0	1	0
73	652991	SKOR2	SKI family transcriptional corepressor 2	18q21.1	-0.0687806	-5.02038	-0.0871393	0.930706	0.958416	-6.17607	0	0	4.01947	-5.02038	9.79727	5.10095e-17	8.63112e-16	28.1982	1	0	1	0
74	6862	TBXT	T-box transcription factor T	6q27	-1.90413	-3.01362	-1.39234	0.166386	0.31437	-5.25334	0	0	5.79942	-3.01362	9.75145	6.56404e-17	1.09369e-15	27.9404	1	0	1	0
75	23119	HIC2	HIC ZBTB transcriptional repressor 2	22q11.21	1.26431	3.37774	4.10175	7.48951e-05	0.000745189	0.997127	0	0	1.59849	3.37774	9.73995	6.9926e-17	1.16017e-15	27.6407	1	0	1	0
76	1749	DLX5	distal-less homeobox 5	7q21.3	2.14451	0.301941	1.87318	0.0634699	0.156764	-4.63531	0	0	4.5592	0.301941	9.6923	9.08829e-17	1.4891e-15	27.5466	1	0	1	0
80	30818	KCNIP3	potassium voltage-gated channel interacting protein 3	2q11.1	-2.70161	2.07948	-2.56301	0.0116092	0.0436396	-3.09281	0	1	2.90553	2.07948	9.61276	1.40721e-16	2.25096e-15	26.9931	1	0	1	1
81	100131980	ZNF705G	zinc finger protein 705G	8p23.1	-0.435062	-4.76945	-0.693265	0.489479	0.647065	-5.94796	0	0	3.13807	-4.76945	9.60043	1.50579e-16	2.40082e-15	27.1399	1	0	1	0
83	6935	ZEB1	zinc finger E-box binding homeobox 1	10p11.22	-1.78628	-1.71627	-1.33507	0.184372	0.337949	-5.31044	0	0	5.0872	-1.71627	9.56583	1.8209e-16	2.87749e-15	26.9159	1	0	1	0
84	3225	HOXC9	homeobox C9	12q13.13	2.62241	-0.601052	2.13246	0.0350011	0.101266	-4.12627	0	0	4.93152	-0.601052	9.56036	1.87642e-16	2.96046e-15	26.8508	1	0	1	0
85	2672	GFI1	growth factor independent 1 transcriptional repressor	1p22.1	-1.28948	1.45502	-1.33942	0.182957	0.336195	-5.35376	0	0	3.00949	1.45502	9.54369	2.0563e-16	3.23126e-15	26.676	1	0	1	0
86	8462	KLF11	Kruppel like factor 11	2p25.1	0.678024	4.90576	1.82286	0.070807	0.170046	-5.36122	0	0	1.74508	4.90576	9.45351	3.37255e-16	5.21191e-15	25.9076	1	0	1	0
87	7161	TP73	tumor protein p73	1p36.32	0.950854	2.91598	0.871294	0.385329	0.551945	-6.22147	0	0	4.07543	2.91598	9.38514	4.90569e-16	7.37773e-15	25.6822	1	0	1	0
88	256297	PTF1A	pancreas associated transcription factor 1a	10p12.2	-0.637216	-4.89554	-0.917376	0.360781	0.528913	-5.77776	0	0	3.36904	-4.89554	9.28424	8.52292e-16	1.25483e-14	25.4459	1	0	1	0
90	11278	KLF12	Kruppel like factor 12	13q22.1	1.50447	1.43057	1.09067	0.277596	0.443671	-5.87518	0	0	4.79026	1.43057	9.12925	1.98753e-15	2.7841e-14	24.3642	1	0	1	0
92	6299	SALL1	spalt like transcription factor 1	16q12.1	-1.04231	-3.26528	-0.659825	0.510627	0.664799	-5.97268	0	0	6.34737	-3.26528	9.09643	2.37711e-15	3.29919e-14	24.4153	1	0	1	0
95	79027	ZNF655	zinc finger protein 655	7q22.1	-0.341355	-2.45541	-0.159292	0.873706	0.924007	-6.1508	0	0	6.99123	-2.45541	8.93077	5.85802e-15	7.74135e-14	23.4574	1	0	1	0
96	84684	INSM2	INSM transcriptional repressor 2	14q13.2	-1.14973	-2.8422	-1.07815	0.283124	0.449938	-5.60707	0	0	4.32613	-2.8422	8.81676	1.08788e-14	1.39531e-13	22.9388	1	0	1	0
98	79733	E2F8	E2F transcription factor 8	11p15.1	0.949466	4.13235	2.42419	0.01683	0.0581463	-4.06639	0	0	1.73222	4.13235	8.71215	1.91723e-14	2.39483e-13	21.9706	1	0	1	0
99	6656	SOX1	SRY-box 1	13q34	-0.941851	-4.16184	-1.06064	0.290977	0.457864	-5.64186	0	0	3.97941	-4.16184	8.64393	2.77223e-14	3.39365e-13	22.0431	1	0	1	0
100	64506	CPEB1	cytoplasmic polyadenylation element binding protein 1	15q25.2	-2.21766	-2.42718	-2.06546	0.0410265	0.113288	-4.15302	0	0	4.228	-2.42718	8.62299	3.1041e-14	3.77634e-13	21.9053	1	0	1	0
101	158399	ZNF483	zinc finger protein 483	9q31.3	-1.06222	4.16612	-1.3085	0.193198	0.348877	-5.74732	0	0	2.37428	4.16612	8.45326	7.74524e-14	8.97706e-13	20.5567	1	0	1	0
102	1870	E2F2	E2F transcription factor 2	1p36.12	0.575938	4.45497	1.45986	0.146934	0.287175	-5.8743	0	0	1.62617	4.45497	8.41661	9.43044e-14	1.08342e-12	20.3631	1	0	1	0
103	83741	TFAP2D	transcription factor AP-2 delta	6p12.3	-0.462934	-5.24373	-0.767277	0.44442	0.606634	-5.89922	0	0	2.60596	-5.24373	8.27893	1.97235e-13	2.18283e-12	20.1278	1	0	1	0
104	389421	LIN28B	lin-28 homolog B	6q16.3-q21	-0.197591	-4.72161	-0.232341	0.816668	0.887836	-6.15049	0	0	3.64558	-4.72161	8.26825	2.08831e-13	2.30596e-12	20.0721	1	0	1	0
105	64919	BCL11B	BAF chromatin remodeling complex subunit BCL11B	14q32.2	2.79322	-2.08839	1.81775	0.0715899	0.171308	-4.61784	0	0	5.30458	-2.08839	8.1029	5.04367e-13	5.31497e-12	19.1332	1	0	1	0
106	4761	NEUROD2	neuronal differentiation 2	17q12	-0.812174	-3.95406	-0.891542	0.374418	0.541958	-5.79039	0	0	3.74514	-3.95406	8.09963	5.13211e-13	5.39946e-12	19.1903	1	0	1	0
107	79727	LIN28A	lin-28 homolog A	1p36.11	0.0260667	-4.17089	0.0323675	0.974233	0.983207	-6.16606	0	0	3.34389	-4.17089	8.0929	5.3193e-13	5.57248e-12	19.1595	1	0	1	0
109	26040	SETBP1	SET binding protein 1	18q12.3	-1.17193	3.87199	-0.953212	0.342393	0.510777	-6.04307	0	0	3.16403	3.87199	8.03524	7.22565e-13	7.44234e-12	18.3646	1	0	1	0
111	2290	FOXG1	forkhead box G1	14q12	-2.68547	-2.50146	-1.53059	0.128496	0.261377	-5.0614	0	0	5.69324	-2.50146	7.99916	8.74963e-13	8.93228e-12	18.5729	1	0	1	0
113	134187	POU5F2	POU domain class 5, transcription factor 2	5q15	-0.332602	-2.37287	-0.40729	0.684519	0.8007	-6.0756	0	0	3.11859	-2.37287	7.97686	9.84676e-13	9.9436e-12	18.5419	1	0	1	0
114	85416	ZIC5	Zic family member 5	13q32.3	0.476119	0.482108	0.322716	0.74747	0.844781	-6.167	0	0	4.25367	0.482108	7.95688	1.09452e-12	1.0957e-11	18.2623	1	0	1	0
116	55553	SOX6	SRY-box 6	11p15.2	0.215241	2.2337	0.2453	0.806642	0.881088	-6.43206	0	0	2.6478	2.2337	7.92319	1.30808e-12	1.29298e-11	17.9409	1	0	1	0
117	339559	ZFP69	ZFP69 zinc finger protein	1p34.2	1.42313	1.25498	1.55421	0.122761	0.252888	-5.24491	0	0	3.15344	1.25498	7.90096	1.47107e-12	1.43528e-11	17.9553	1	0	1	0
118	85446	ZFHX2	zinc finger homeobox 2	14q11.2	-0.0229254	2.73335	-0.0425947	0.966095	0.978656	-6.49809	0	0	1.7475	2.73335	7.89712	1.50121e-12	1.4625e-11	17.8342	1	0	1	0
119	91133	L3MBTL4	L3MBTL histone methyl-lysine binding protein 4	18p11.31	-2.13673	-1.87027	-1.26259	0.209176	0.368302	-5.40703	0	0	5.27556	-1.87027	7.80471	2.4436e-12	2.31392e-11	17.5615	1	0	1	0
120	6660	SOX5	SRY-box 5	12p12.1	-2.77004	-1.95653	-1.98744	0.0491441	0.130028	-4.30561	0	0	4.75588	-1.95653	7.69734	4.29466e-12	3.95783e-11	17.0574	1	0	1	0
121	4821	NKX2-2	NK2 homeobox 2	20p11.22	-4.79685	-0.764656	-3.02161	0.00307217	0.0157019	-1.93731	0	1	4.43017	-0.764656	7.64317	5.70284e-12	5.1777e-11	16.6669	1	0	1	1
124	30062	RAX	retina and anterior neural fold homeobox	18q21.32	-0.548115	-4.6029	-0.765944	0.44521	0.607417	-5.8969	0	0	2.7763	-4.6029	7.44681	1.58563e-11	1.34207e-10	15.8495	1	0	1	0
125	55888	ZKSCAN7	zinc finger with KRAB and SCAN domains 7	3p21.31	1.04634	0.734216	1.06846	0.287451	0.454147	-5.75029	0	0	3.10248	0.734216	7.40022	2.01837e-11	1.6901e-10	15.4454	1	0	1	0
128	57507	ZNF608	zinc finger protein 608	5q23.2	-0.146045	3.28742	-0.152796	0.878815	0.927431	-6.51278	0	0	2.55403	3.28742	7.19611	5.77355e-11	4.56553e-10	14.1304	1	0	1	0
129	4603	MYBL1	MYB proto-oncogene like 1	8q13.1	0.282822	4.08599	0.45502	0.649915	0.776375	-6.72483	0	0	2.02343	4.08599	7.19243	5.88334e-11	4.65047e-10	14.0168	1	0	1	0
131	5080	PAX6	paired box 6	11p13	-0.190312	-0.84618	-0.13045	0.896428	0.937421	-6.14569	0	0	4.11115	-0.84618	7.14875	7.35686e-11	5.6891e-10	14.224	1	0	1	0
132	54753	ZNF853	zinc finger protein 853	7p22.1	1.12248	2.02403	1.38506	0.168598	0.317099	-5.57974	0	0	2.59864	2.02403	7.12801	8.17931e-11	6.29531e-10	13.9473	1	0	1	0
133	10736	SIX2	SIX homeobox 2	2p21	2.55435	1.49131	2.092	0.0385412	0.108488	-4.45238	0	0	4.07724	1.49131	7.12266	8.40578e-11	6.45947e-10	13.9056	1	0	1	0
135	85508	SCRT2	scratch family transcriptional repressor 2	20p13	-0.531787	-5.17744	-0.93068	0.353882	0.521921	-5.76601	0	0	2.11085	-5.17744	7.09235	9.81089e-11	7.43149e-10	14.0732	1	0	1	0
138	7025	NR2F1	nuclear receptor subfamily 2 group F member 1	5q15	1.19511	0.665987	0.73427	0.464212	0.624737	-6.0016	0	0	4.37202	0.665987	7.03413	1.31935e-10	9.78585e-10	13.5518	1	0	1	0
139	3238	HOXD12	homeobox D12	2q31.1	1.46985	-3.92668	1.81436	0.0721135	0.172339	-4.59121	0	0	2.87705	-3.92668	6.98678	1.67761e-10	1.2244e-09	13.553	1	0	1	0
140	6496	SIX3	SIX homeobox 3	2p21	2.0914	-0.167649	1.9451	0.054095	0.139844	-4.51152	0	0	3.46744	-0.167649	6.91983	2.35372e-10	1.68278e-09	13.0746	1	0	1	0
142	59336	PRDM13	PR/SET domain 13	6q16.2	0.687314	-4.28263	0.732042	0.465566	0.626043	-5.90258	0	0	3.30512	-4.28263	6.90365	2.55393e-10	1.81468e-09	13.1434	1	0	1	0
143	4808	NHLH2	nescient helix-loop-helix 2	1p13.1	-1.86416	-3.47226	-1.66136	0.0992439	0.216782	-4.86444	0	0	3.85972	-3.47226	6.81298	4.0299e-10	2.76717e-09	12.6847	1	0	1	0
144	5450	POU2AF1	POU class 2 homeobox associating factor 1	11q23.1	-1.53575	-1.68968	-1.21499	0.226747	0.388632	-5.45334	0	0	3.82939	-1.68968	6.78233	4.69897e-10	3.19971e-09	12.482	1	0	1	0
145	2099	ESR1	estrogen receptor 1	6q25.1-q25.2	-2.42925	-1.73782	-1.77813	0.0779078	0.182256	-4.66784	0	0	4.13915	-1.73782	6.77608	4.84845e-10	3.29234e-09	12.4441	1	0	1	0
146	3394	IRF8	interferon regulatory factor 8	16q24.1	-1.12804	-4.09378	-1.00522	0.31681	0.484442	-5.69653	0	0	3.92504	-4.09378	6.75992	5.25659e-10	3.55718e-09	12.4376	1	0	1	0
147	2115	ETV1	ETS variant 1	7p21.2	1.89627	1.05693	1.31964	0.18946	0.344155	-5.63373	0	0	4.09754	1.05693	6.75317	5.43709e-10	3.66793e-09	12.0623	1	0	1	0
149	29842	TFCP2L1	transcription factor CP2 like 1	2q14.2	0.992198	4.67938	1.21644	0.226199	0.387949	-6.25561	0	0	2.69249	4.67938	6.72794	6.16744e-10	4.12234e-09	11.6254	1	0	1	0
150	27319	BHLHE22	basic helix-loop-helix family member e22	8q12.3	-0.74165	-4.5597	-1.04909	0.296237	0.463426	-5.65364	0	0	2.47877	-4.5597	6.71628	6.53689e-10	4.35297e-09	12.2298	1	0	1	0
151	101060200	ZNF891	zinc finger protein 891	12q24.33	0.147913	3.76124	0.267861	0.789265	0.870462	-6.76636	0	0	1.64863	3.76124	6.63638	9.72742e-10	6.30418e-09	11.2702	1	0	1	0
154	29942	PURG	purine rich element binding protein G	8p12	-0.629556	-4.52858	-0.819064	0.414369	0.579909	-5.8564	0	0	2.62971	-4.52858	6.56643	1.37536e-09	8.74017e-09	11.508	1	0	1	0
157	5078	PAX4	paired box 4	7q32.1	-0.848679	-4.76234	-1.10666	0.270647	0.436234	-5.59422	0	0	2.61881	-4.76234	6.53643	1.59481e-09	1.0034e-08	11.3639	1	0	1	0
158	158800	RHOXF1	Rhox homeobox family member 1	Xq24	-1.8616	-3.3964	-2.64121	0.00935749	0.0369607	-2.91022	0	1	2.40498	-3.3964	6.52051	1.72496e-09	1.07905e-08	11.2889	1	0	1	1
159	9745	ZNF536	zinc finger protein 536	19q12	-1.36677	-3.31692	-1.11298	0.267933	0.433497	-5.58715	0	0	4.07743	-3.31692	6.51707	1.75445e-09	1.09436e-08	11.2588	1	0	1	0
160	63973	NEUROG2	neurogenin 2	4q25	-0.969889	-3.96701	-1.11083	0.268854	0.434379	-5.58644	0	0	2.9533	-3.96701	6.49208	1.98396e-09	1.22737e-08	11.1524	1	0	1	0
161	116071	BATF2	basic leucine zipper ATF-like transcription factor 2	11q13.1	2.54936	-1.58111	2.29466	0.0234857	0.0748665	-3.74315	0	0	3.50546	-1.58111	6.47439	2.16413e-09	1.33169e-08	10.9936	1	0	1	0
164	7710	ZNF154	zinc finger protein 154	19q13.43	1.55942	-0.0641664	2.95364	0.00377801	0.0183811	-2.22256	0	0	1.75068	-0.0641664	6.35247	3.92796e-09	2.33286e-08	10.3979	1	0	1	0
165	55509	BATF3	basic leucine zipper ATF-like transcription factor 3	1q32.3	1.4789	-2.50129	1.6802	0.0955133	0.210889	-4.81287	0	0	2.66412	-2.50129	6.15062	1.04177e-08	5.79579e-08	9.52518	1	0	1	0
166	7546	ZIC2	Zic family member 2	13q32.3	-3.23778	1.95325	-1.89566	0.0604039	0.151293	-4.45413	0	0	3.07531	1.95325	6.13222	1.13782e-08	6.29444e-08	9.05782	1	0	1	0
167	6664	SOX11	SRY-box 11	2p25.2	0.71796	0.141778	0.371383	0.711005	0.819003	-6.14341	0	0	4.33688	0.141778	6.07949	1.46391e-08	7.98525e-08	8.95604	1	0	1	0
168	4613	MYCN	MYCN proto-oncogene, bHLH transcription factor	2p24.3	-1.90025	-2.74043	-1.5327	0.127974	0.260531	-5.05562	0	0	3.69228	-2.74043	6.02911	1.86058e-08	9.97208e-08	8.95178	1	0	1	0
171	163115	ZNF781	zinc finger protein 781	19q13.12	-1.3394	-0.994246	-1.6229	0.107227	0.228891	-4.89883	0	0	2.25934	-0.994246	6.01352	2.00352e-08	1.06769e-07	8.84525	1	0	1	0
172	389692	MAFA	MAF bZIP transcription factor A	8q24.3	0.698151	-1.8786	0.662798	0.508728	0.663297	-5.94444	0	0	2.93078	-1.8786	5.97267	2.43117e-08	1.27583e-07	8.67088	1	0	1	0
174	5077	PAX3	paired box 3	2q36.1	-1.13273	-3.74997	-1.25961	0.210247	0.369492	-5.42129	0	0	2.76428	-3.74997	5.87844	3.7891e-08	1.92858e-07	8.29467	1	0	1	0
175	4610	MYCL	MYCL proto-oncogene, bHLH transcription factor	1p34.2	0.801954	3.66477	0.917125	0.360912	0.528986	-6.35447	0	0	2.35331	3.66477	5.87018	3.93869e-08	1.99539e-07	7.68334	1	0	1	0
177	201501	ZBTB7C	zinc finger and BTB domain containing 7C	18q21.1	2.03861	2.71022	2.33402	0.0212529	0.0694867	-4.12671	0	0	2.65595	2.71022	5.79251	5.66153e-08	2.79488e-07	7.44357	1	0	1	0
178	9658	ZNF516	zinc finger protein 516	18q23	-2.82974	-1.4033	-1.48196	0.140966	0.278556	-5.12782	0	0	4.62821	-1.4033	5.77572	6.12153e-08	3.00198e-07	7.68619	1	0	1	0
179	53335	BCL11A	BAF chromatin remodeling complex subunit BCL11A	2p16.1	3.26641	0.825091	2.42499	0.0167948	0.0580477	-3.72439	0	0	3.99694	0.825091	5.7638	6.47015e-08	3.1603e-07	7.48434	1	0	1	0
181	729747	ZNF878	zinc finger protein 878	19p13.2	-1.2575	-0.625611	-1.82734	0.0701264	0.168659	-4.56746	0	0	1.79183	-0.625611	5.74823	6.95471e-08	3.38014e-07	7.63508	1	0	1	0
184	647219	ASCL5	achaete-scute family bHLH transcription factor 5	1q32.1	0.254761	-1.72036	0.376067	0.707529	0.816299	-6.08523	0	0	1.9053	-1.72036	5.70646	8.43815e-08	4.04697e-07	7.50335	1	0	1	0
185	3662	IRF4	interferon regulatory factor 4	6p25.3	0.750695	-4.06167	1.09167	0.27716	0.443198	-5.58788	0	0	2.0006	-4.06167	5.6999	8.69776e-08	4.16232e-07	7.49174	1	0	1	0
186	390598	SKOR1	SKI family transcriptional corepressor 1	15q23	-1.80508	-0.891501	-2.07534	0.0400861	0.111507	-4.11682	0	0	2.22218	-0.891501	5.68327	9.39147e-08	4.4703e-07	7.33826	1	0	1	0
189	80714	PBX4	PBX homeobox 4	19p13.11	-2.43713	0.467538	-2.57992	0.0110846	0.0421606	-3.03699	0	1	2.14233	0.467538	5.65314	1.07888e-07	5.07873e-07	7.12047	1	0	1	1
190	8022	LHX3	LIM homeobox 3	9q34.3	-1.47944	-3.12183	-1.17287	0.243163	0.406477	-5.50985	0	0	3.49492	-3.12183	5.62436	1.23126e-07	5.7368e-07	7.12695	1	0	1	0
192	5458	POU4F2	POU class 4 homeobox 2	4q31.22	-2.1673	-3.581	-1.76064	0.0808394	0.187149	-4.70426	0	0	3.46431	-3.581	5.56594	1.60827e-07	7.36396e-07	6.87762	1	0	1	0
193	56956	LHX9	LIM homeobox 9	1q31.3	1.72073	-1.98569	1.44713	0.150461	0.292465	-5.16812	0	0	3.15859	-1.98569	5.56102	1.64474e-07	7.52038e-07	6.82678	1	0	1	0
194	148206	ZNF714	zinc finger protein 714	19p12	0.802498	4.15763	1.06189	0.290414	0.457161	-6.35409	0	0	2.0391	4.15763	5.51521	2.02565e-07	9.1259e-07	6.0107	1	0	1	0
195	27022	FOXD3	forkhead box D3	1p31.3	-3.34153	-1.98698	-2.98331	0.0034533	0.0171667	-2.04031	0	1	3.0023	-1.98698	5.51511	2.02649e-07	9.12757e-07	6.62838	1	0	1	1
197	93166	PRDM6	PR/SET domain 6	5q23.2	-1.67651	-1.69382	-1.30773	0.193457	0.349184	-5.33928	0	0	3.13064	-1.69382	5.44214	2.81841e-07	1.24206e-06	6.27129	1	0	1	0
198	165	AEBP1	AE binding protein 1	7p13	-1.49319	0.836056	-1.11418	0.267424	0.43289	-5.56481	0	0	2.71315	0.836056	5.42822	3.00076e-07	1.31562e-06	6.06678	1	0	1	0
199	84528	RHOXF2	Rhox homeobox family member 2	Xq24	0.128675	-3.75222	0.145425	0.884619	0.930686	-6.15032	0	0	2.44708	-3.75222	5.40559	3.32186e-07	1.4451e-06	6.20032	1	0	1	0
200	731220	RFX8	RFX family member 8, lacking RFX DNA binding domain	2q11.2	-0.232565	-4.11786	-0.292355	0.770518	0.858803	-6.13188	0	0	2.22377	-4.11786	5.40487	3.33258e-07	1.44845e-06	6.19573	1	0	1	0
201	9480	ONECUT2	one cut homeobox 2	18q21.31	-4.92418	4.2108	-3.37712	0.000987117	0.0063036	-0.937235	0	1	1.81018	4.2108	5.40325	3.3569e-07	1.45743e-06	5.49607	1	0	1	1
203	2304	FOXE1	forkhead box E1	9q22.33	-1.88222	-2.6787	-1.43012	0.155275	0.299036	-5.19135	0	0	3.37629	-2.6787	5.31958	4.87825e-07	2.0618e-06	5.78391	1	0	1	0
204	60468	BACH2	BTB domain and CNC homolog 2	6q15	-2.86102	0.227261	-2.88221	0.00467817	0.0216274	-2.29044	0	1	2.16475	0.227261	5.31914	4.88776e-07	2.06537e-06	5.67265	1	0	1	1
205	10661	KLF1	Kruppel like factor 1	19p13.13	0.177367	-2.6825	0.276265	0.782819	0.866455	-6.11676	0	0	1.72737	-2.6825	5.31764	4.92051e-07	2.07742e-06	5.81964	1	0	1	0
206	23493	HEY2	hes related family bHLH transcription factor with YRPW motif 2	6q22.31	-4.14184	-1.0724	-2.64858	0.00916706	0.0363991	-2.88985	0	1	3.45802	-1.0724	5.2585	6.39541e-07	2.64935e-06	5.41425	1	0	1	1
207	26508	HEYL	hes related family bHLH transcription factor with YRPW motif like	1p34.2	2.35689	-2.53459	1.92068	0.0571382	0.145524	-4.41861	0	0	3.15091	-2.53459	5.19845	8.33168e-07	3.37728e-06	5.28415	1	0	1	0
208	190	NR0B1	nuclear receptor subfamily 0 group B member 1	Xp21.2	0.368867	-4.42253	0.364372	0.71622	0.823124	-6.10094	0	0	2.69706	-4.42253	5.19019	8.6393e-07	3.49259e-06	5.28002	1	0	1	0
212	57057	TBX20	T-box 20	7p14.2	-0.963619	-4.17914	-1.09605	0.275244	0.441285	-5.60531	0	0	2.31239	-4.17914	5.0353	1.69425e-06	6.51489e-06	4.63271	1	0	1	0
213	4009	LMX1A	LIM homeobox transcription factor 1 alpha	1q23.3	0.242782	-3.87371	0.240087	0.810671	0.883544	-6.13302	0	0	2.59425	-3.87371	5.01453	1.85271e-06	7.07289e-06	4.54838	1	0	1	0
214	3975	LHX1	LIM homeobox 1	17q12	-1.35623	-4.05045	-1.4429	0.151646	0.294011	-5.18559	0	0	2.39026	-4.05045	4.86101	3.56343e-06	1.29125e-05	3.92165	1	0	1	0
215	64211	LHX5	LIM homeobox 5	12q24.13	-0.947422	-3.86649	-0.980685	0.328716	0.496951	-5.70779	0	0	2.41193	-3.86649	4.8324	4.01999e-06	1.44309e-05	3.80663	1	0	1	0
216	2297	FOXD1	forkhead box D1	5q13.2	-0.741823	2.29439	-0.569534	0.570055	0.713069	-6.18532	0	0	2.24667	2.29439	4.81679	4.29236e-06	1.53105e-05	3.29246	1	0	1	0
217	11166	SOX21	SRY-box 21	13q32.1	-3.20166	-1.43951	-2.16932	0.0320245	0.0949121	-3.95354	0	0	3.34731	-1.43951	4.7688	5.24721e-06	1.84183e-05	3.48113	1	0	1	0
218	6887	TAL2	TAL bHLH transcription factor 2	9q31.2	0.593282	-2.51937	0.736234	0.463021	0.623647	-5.89263	0	0	1.93186	-2.51937	4.75697	5.51241e-06	1.92458e-05	3.49947	1	0	1	0
219	121643	FOXN4	forkhead box N4	12q24.11	-0.514267	1.08158	-0.376991	0.706844	0.815808	-6.15607	0	0	2.51758	1.08158	4.75135	5.64302e-06	1.96773e-05	3.20896	1	0	1	0
221	140690	CTCFL	CCCTC-binding factor like	20q13.31	-0.937548	-4.3877	-1.31927	0.189582	0.344346	-5.34815	0	0	1.73236	-4.3877	4.67682	7.68404e-06	2.61617e-05	3.18429	1	0	1	0
223	26257	NKX2-8	NK2 homeobox 8	14q13.3	0.264867	-3.24335	0.302025	0.763154	0.854621	-6.11081	0	0	2.0742	-3.24335	4.65929	8.25912e-06	2.79789e-05	3.11742	1	0	1	0
225	2104	ESRRG	estrogen related receptor gamma	1q41	1.04691	2.20307	0.91543	0.361797	0.529801	-6.12266	0	0	2.38703	2.20307	4.58693	1.11062e-05	3.67601e-05	2.4156	1	0	1	0
227	84437	MSANTD4	Myb/SANT DNA binding domain containing 4 with coiled-coils	11q22.3	0.941789	2.80107	0.760984	0.448155	0.609801	-6.34217	0	0	2.49841	2.80107	4.56721	1.20338e-05	3.96296e-05	2.22468	1	0	1	0
229	91752	ZNF804A	zinc finger protein 804A	2q32.1	-0.21869	-4.58384	-0.24821	0.804395	0.879714	-6.1468	0	0	2.07311	-4.58384	4.541	1.33829e-05	4.36839e-05	2.65558	1	0	1	0
230	84671	ZNF347	zinc finger protein 347	19q13.42	1.82572	3.7823	2.03193	0.0443625	0.120364	-4.91262	0	0	2.20999	3.7823	4.53341	1.38006e-05	4.49349e-05	1.9894	1	0	1	0
231	137209	ZNF572	zinc finger protein 572	8q24.13	0.738476	1.40997	0.642611	0.521699	0.673584	-6.17499	0	0	2.3142	1.40997	4.53004	1.39897e-05	4.5498e-05	2.3174	1	0	1	0
232	54796	BNC2	basonuclin 2	9p22.3-p22.2	-3.32523	-2.16039	-2.1343	0.0348472	0.100971	-4.02351	0	0	3.33072	-2.16039	4.51438	1.49026e-05	4.82349e-05	2.47958	1	0	1	0
234	4776	NFATC4	nuclear factor of activated T cells 4	14q12	-0.27627	4.34636	-0.301627	0.763457	0.854621	-6.67713	0	0	1.68167	4.34636	4.45701	1.87644e-05	5.95451e-05	1.64175	1	0	1	0
236	84450	ZNF512	zinc finger protein 512	2p23.3	2.53005	3.8946	2.14736	0.0337704	0.0987023	-4.72571	0	0	2.87952	3.8946	4.40558	2.30327e-05	7.18685e-05	1.47265	1	0	1	0
237	7021	TFAP2B	transcription factor AP-2 beta	6p12.3	-1.9019	-1.88148	-1.30248	0.195241	0.351228	-5.35127	0	0	3.03367	-1.88148	4.39824	2.37134e-05	7.37812e-05	2.04981	1	0	1	0
238	23314	SATB2	SATB homeobox 2	2q33.1	-3.19884	1.58522	-2.32306	0.0218551	0.0709016	-3.61836	0	0	1.99081	1.58522	4.36853	2.66721e-05	8.20754e-05	1.63553	1	0	1	0
239	256380	SCML4	Scm polycomb group protein like 4	6q21	-1.24496	-4.2663	-1.49951	0.13636	0.27206	-5.10668	0	0	1.89264	-4.2663	4.36324	2.72344e-05	8.3635e-05	1.98142	1	0	1	0
240	5324	PLAG1	PLAG1 zinc finger	8q12.1	-1.23459	-0.924165	-1.11215	0.26829	0.433862	-5.56056	0	0	2.19456	-0.924165	4.34247	2.95576e-05	9.02325e-05	1.81894	1	0	1	0
241	58160	NFE4	nuclear factor, erythroid 4	7q22.1	-0.920189	-4.42339	-1.1322	0.2598	0.424931	-5.56358	0	0	1.83256	-4.42339	4.32919	3.11408e-05	9.47266e-05	1.85436	1	0	1	0
243	56979	PRDM9	PR/SET domain 9	5p14.2	1.65168	-4.11789	1.73079	0.0860532	0.195912	-4.72894	0	0	2.08057	-4.11789	4.28926	3.64092e-05	0.000109144	1.70775	1	0	1	0
245	9586	CREB5	cAMP responsive element binding protein 5	7p15.1	0.206927	1.5638	0.161613	0.871881	0.922704	-6.31151	0	0	2.22428	1.5638	4.22023	4.75978e-05	0.00013959	1.12602	1	0	1	0
246	2296	FOXC1	forkhead box C1	6p25.3	2.04681	-0.420615	2.12748	0.0354209	0.102183	-4.1469	0	0	2.11986	-0.420615	4.17742	5.61241e-05	0.000162434	1.19365	1	0	1	0
247	2302	FOXJ1	forkhead box J1	17q25.1	-0.634984	2.22383	-0.321376	0.748483	0.845401	-6.23896	0	0	2.85717	2.22383	4.17461	5.6732e-05	0.000163999	0.834357	1	0	1	0
248	2625	GATA3	GATA binding protein 3	10p14	-1.31408	-3.37857	-1.30275	0.195147	0.351223	-5.35529	0	0	2.16865	-3.37857	4.1727	5.71492e-05	0.000165084	1.27971	1	0	1	0
249	5896	RAG1	recombination activating 1	11p12	2.19029	-0.441722	2.34283	0.0207795	0.068216	-3.70243	0	0	2.09216	-0.441722	4.16744	5.83129e-05	0.000168222	1.16608	1	0	1	0
251	10472	ZBTB18	zinc finger and BTB domain containing 18	1q44	-5.75107	4.81156	-3.01532	0.00313202	0.0159209	-1.95391	0	1	1.72262	4.81156	4.15156	6.19652e-05	0.000177973	0.416972	1	0	1	1
253	253738	EBF3	EBF transcription factor 3	10q26.3	-3.81896	-0.92159	-2.33	0.0214723	0.0699722	-3.60978	0	0	2.88579	-0.92159	4.11374	7.1565e-05	0.0002029	0.913009	1	0	1	0
254	153572	IRX2	iroquois homeobox 2	5p15.33	-6.79615	1.75779	-2.76914	0.00651118	0.0279656	-2.59424	0	1	2.946	1.75779	4.11046	7.24616e-05	0.000205087	0.548122	1	0	1	1
255	23090	ZNF423	zinc finger protein 423	16q12.1	-2.125	-2.36191	-1.69618	0.0924377	0.206257	-4.80629	0	0	2.63532	-2.36191	4.08605	7.94822e-05	0.000223185	0.958584	1	0	1	0
256	1961	EGR4	early growth response 4	2p13.2	-1.96002	-3.87625	-2.03244	0.0443097	0.120254	-4.22145	0	0	2.06245	-3.87625	4.08418	8.00436e-05	0.000224697	0.962641	1	0	1	0
257	3201	HOXA4	homeobox A4	7p15.2	1.64793	0.536199	1.88412	0.0619617	0.154165	-4.69157	0	0	1.85203	0.536199	4.036	9.59606e-05	0.000265991	0.597748	1	0	1	0
258	30832	ZNF354C	zinc finger protein 354C	5q35.3	-4.28974	1.89885	-1.9823	0.0497249	0.13127	-4.29773	0	0	2.59991	1.89885	4.00798	0.000106568	0.000293072	0.223643	1	0	1	0
259	6492	SIM1	SIM bHLH transcription factor 1	6q16.3	1.25217	-3.46835	1.23716	0.218437	0.378683	-5.42134	0	0	2.06007	-3.46835	4.00231	0.000108843	0.000298911	0.67276	1	0	1	0
261	79413	ZBED2	zinc finger BED-type containing 2	3q13.13	1.41281	-4.39867	1.47144	0.143783	0.282425	-5.12444	0	0	1.94031	-4.39867	3.97476	0.000120589	0.000327772	0.572252	1	0	1	0
264	26137	ZBTB20	zinc finger and BTB domain containing 20	3q13.31	-0.757217	1.87981	-0.712155	0.477748	0.637045	-6.07932	0	0	1.59123	1.87981	3.85092	0.000190031	0.000496893	-0.244049	1	0	1	0
266	168417	ZNF679	zinc finger protein 679	7q11.21	-0.845425	-4.62421	-0.95197	0.34302	0.511401	-5.74334	0	0	1.75425	-4.62421	3.79492	0.000232674	0.000596466	-0.0440283	1	0	1	0
268	8110	DPF3	double PHD fingers 3	14q24.2	-2.87444	-2.43008	-2.49406	0.0139865	0.0503006	-3.25279	0	0	2.18529	-2.43008	3.71969	0.000304413	0.000761073	-0.312324	1	0	1	0
270	3222	HOXC5	homeobox C5	12q13.13	2.11851	0.129876	2.38492	0.0186443	0.0627803	-3.67554	0	0	1.80764	0.129876	3.64919	0.000390293	0.000952825	-0.664489	1	0	1	0
271	23036	ZNF292	zinc finger protein 292	6q14.3	0.309652	5.7753	0.342088	0.732881	0.835049	-6.97991	0	0	1.612	5.7753	3.6424	0.000399683	0.000974198	-1.41821	1	0	1	0
272	23619	ZIM2	zinc finger imprinted 2	19q13.43	-1.20207	-4.42902	-1.36165	0.175853	0.32667	-5.29393	0	0	1.67459	-4.42902	3.63418	0.000411328	0.00100019	-0.577512	1	0	1	0
273	5241	PGR	progesterone receptor	11q22.1	-0.401639	-3.69324	-0.294775	0.768674	0.85782	-6.12203	0	0	2.49133	-3.69324	3.5625	0.000527414	0.00125371	-0.807121	1	0	1	0
274	3203	HOXA6	homeobox A6	7p15.2	1.6405	0.0394485	1.52894	0.128904	0.261963	-5.21644	0	0	1.97899	0.0394485	3.56195	0.000528403	0.00125584	-0.966686	1	0	1	0
275	23440	OTP	orthopedia homeobox	5q14.1	0.87174	-2.80045	0.638182	0.524568	0.675862	-5.95811	0	0	2.44268	-2.80045	3.53016	0.000589339	0.00138796	-0.912768	1	0	1	0
278	139735	ZFP92	ZFP92 zinc finger protein	Xq28	-3.02998	-2.36526	-2.34456	0.0206876	0.0679686	-3.58766	0	0	2.26141	-2.36526	3.40763	0.000891812	0.0020247	-1.31035	1	0	1	0
279	5992	RFX4	regulatory factor X4	12q23.3	0.239079	-3.14766	0.254549	0.799506	0.876859	-6.12679	0	0	1.61755	-3.14766	3.37228	0.00100311	0.00225828	-1.40286	1	0	1	0
281	90316	TGIF2LX	TGFB induced factor homeobox 2 like X-linked	Xq21.31	0.601343	-4.75723	0.525719	0.600051	0.737167	-6.02923	0	0	1.94473	-4.75723	3.32522	0.00117155	0.00259579	-1.54922	1	0	1	0
288	100129842	ZNF737	zinc finger protein 737	19p12	0.319723	3.23096	0.203445	0.839131	0.901956	-6.56212	0	0	2.07363	3.23096	3.14976	0.00206148	0.0043331	-2.65535	1	0	1	0
290	100129654	TCF24	transcription factor 24	8q13.1	-0.181398	-1.67431	-0.155446	0.87673	0.926306	-6.14144	0	0	1.78054	-1.67431	3.09673	0.00243503	0.00505487	-2.24589	1	0	1	0
291	56978	PRDM8	PR/SET domain 8	4q21.21	-0.0804754	-0.626263	-0.0631153	0.949779	0.969145	-6.16379	0	0	1.80663	-0.626263	3.05011	0.00281423	0.00576888	-2.44264	1	0	1	0
292	63950	DMRTA2	DMRT like family A2	1p32.3	-0.934357	-3.17363	-0.832401	0.406831	0.572583	-5.82964	0	0	1.7567	-3.17363	3.04816	0.0028312	0.00580114	-2.35635	1	0	1	0
294	6886	TAL1	TAL bHLH transcription factor 1, erythroid differentiation factor	1p33	-0.67784	-3.15615	-0.625088	0.533097	0.68326	-5.97309	0	0	1.68447	-3.15615	3.02976	0.00299628	0.00611256	-2.40781	1	0	1	0
295	30012	TLX3	T cell leukemia homeobox 3	5q35.1	2.35992	-3.67697	2.20778	0.0291555	0.0884698	-3.8548	0	0	1.61724	-3.67697	2.97129	0.00358157	0.00720244	-2.57099	1	0	1	0
296	10150	MBNL2	muscleblind like splicing regulator 2	13q32.1	1.92837	4.34127	1.71374	0.0891509	0.200982	-5.57453	0	0	1.83489	4.34127	2.97089	0.00358599	0.00721058	-3.33937	1	0	1	0
298	1879	EBF1	EBF transcription factor 1	5q33.3	-3.74307	-1.74772	-2.64651	0.00922013	0.0365313	-2.89704	0	1	2.05516	-1.74772	2.89805	0.0044631	0.00881517	-2.80887	1	0	1	1
301	10320	IKZF1	IKAROS family zinc finger 1	7p12.2	-1.64522	-3.89432	-1.35165	0.179024	0.330712	-5.30656	0	0	1.72885	-3.89432	2.71499	0.00760293	0.0142462	-3.25164	1	0	1	0
303	2122	MECOM	MDS1 and EVI1 complex locus	3q26.2	1.53354	0.683111	1.05199	0.294913	0.462091	-5.98943	0	0	2.01485	0.683111	2.6548	0.00900901	0.0165768	-3.74548	1	0	1	0
305	7757	ZNF208	zinc finger protein 208	19p12	-1.67362	-2.91461	-0.994511	0.32197	0.489617	-5.69073	0	0	2.25663	-2.91461	2.64643	0.00922234	0.0169328	-3.43776	1	0	1	0
307	117154	DACH2	dachshund family transcription factor 2	Xq21.2	-2.59329	-2.74268	-1.83047	0.0696542	0.167853	-4.58627	0	0	1.9235	-2.74268	2.59592	0.010608	0.0192162	-3.54883	1	0	1	0
308	6910	TBX5	T-box 5	12q24.21	-1.3673	-3.38753	-0.800611	0.424935	0.589432	-5.86526	0	0	2.29828	-3.38753	2.59404	0.010663	0.0193068	-3.5533	1	0	1	0
163	9095	TBX19	T-box 19	1q24.2	1.83697	1.52207	4.43173	2.07573e-05	0.00024671	2.39772	1	0	1.52666	1.52207	6.41071	2.95649e-09	1.78509e-08	10.5569	0	0	1	0
211	89884	LHX4	LIM homeobox 4	1q25.2	1.76439	2.2459	3.49488	0.000664699	0.00459803	-0.946602	1	0	1.492	2.2459	5.05845	1.53319e-06	5.94101e-06	4.37654	0	0	1	0
222	2004	ELK3	ETS transcription factor ELK3	12q23.1	2.114	2.85241	5.2254	7.40067e-07	1.36661e-05	5.38431	1	0	1.21378	2.85241	4.66786	7.9731e-06	2.70707e-05	2.73064	0	0	1	0
226	84662	GLIS2	GLIS family zinc finger 2	16p13.3	2.34753	3.27723	6.01023	2.03499e-08	5.43708e-07	8.79549	1	0	1.13994	3.27723	4.57879	1.14806e-05	3.79224e-05	2.28475	0	0	1	0
228	2100	ESR2	estrogen receptor 2	14q23.2-q23.3	2.01455	0.941343	4.56456	1.21642e-05	0.000156326	2.93571	1	0	1.21284	0.941343	4.56278	1.22525e-05	4.02821e-05	2.56503	0	0	1	0
262	7621	ZNF70	zinc finger protein 70	22q11.23	1.76593	3.11129	7.01129	1.48155e-10	5.89343e-09	13.6269	1	0	0.637248	3.11129	3.88705	0.000166587	0.000440823	-0.196986	0	0	1	0
276	2114	ETS2	ETS proto-oncogene 2, transcription factor	21q22.2	2.30218	5.19864	3.13789	0.00214015	0.0117433	-2.36873	1	0	1.41154	5.19864	3.5005	0.000652118	0.00152228	-1.8331	0	0	1	0
282	140883	ZNF280B	zinc finger protein 280B	22q11.22	1.73818	2.83776	3.76656	0.000257592	0.00210222	-0.180174	1	0	0.957146	2.83776	3.31342	0.00121773	0.0026875	-2.05673	0	0	1	0
283	122953	JDP2	Jun dimerization protein 2	14q24.3	2.64309	1.92715	4.90336	2.97874e-06	4.69205e-05	4.09054	1	0	1.22084	1.92715	3.22799	0.00160663	0.00345479	-2.16219	0	0	1	0
285	5914	RARA	retinoic acid receptor alpha	17q21.2	1.76694	3.94328	4.89704	3.05966e-06	4.80024e-05	3.92779	1	0	0.701974	3.94328	3.19089	0.00180927	0.00384541	-2.57863	0	0	1	0
289	2034	EPAS1	endothelial PAS domain protein 1	2p21	1.84281	4.87614	2.56284	0.0116147	0.043652	-3.87146	1	0	1.24441	4.87614	3.14274	0.00210769	0.00442357	-2.89142	0	0	1	0
293	728361	OVOL3	ovo like zinc finger 3	19q13.12	1.96308	-2.61089	2.70895	0.00773432	0.0319725	-2.73697	1	0	1.1419	-2.61089	3.04388	0.00286887	0.00587097	-2.36763	0	0	1	0
299	11063	SOX30	SRY-box 30	5q33.3	8.4596	-3.29526	20.6811	1.98256e-41	1.296e-38	82.6874	1	0	1.17831	-3.29526	2.86691	0.00489483	0.00958009	-2.85505	0	0	1	0
302	166815	TIGD2	tigger transposable element derived 2	4q22.1	1.98587	2.84886	8.29155	1.84354e-13	1.11242e-11	20.1705	1	0	0.447828	2.84886	2.68078	0.00837539	0.0155481	-3.76316	0	0	1	0
309	6772	STAT1	signal transducer and activator of transcription 1	2q32.2	2.299	6.70483	5.48093	2.36588e-07	4.9464e-06	6.26512	1	0	0.578736	6.70483	2.53515	0.012522	0.0222759	-4.62195	0	0	1	0
312	50943	FOXP3	forkhead box P3	Xp11.23	1.8751	-1.07364	3.82558	0.00020831	0.00176389	0.43775	1	0	0.64852	-1.07364	2.35386	0.0202	0.0341867	-4.12851	0	0	1	0
313	1999	ELF3	E74 like ETS transcription factor 3	1q32.1	2.6299	7.00214	4.0222	0.000101053	0.00096765	0.426163	1	0	0.786242	7.00214	2.21089	0.0289331	0.047347	-5.37569	0	0	1	0
314	6689	SPIB	Spi-B transcription factor	19q13.33	5.47662	-3.1222	7.89679	1.50381e-12	8.03576e-11	18.0877	1	0	0.997547	-3.1222	2.18748	0.0306404	0.0498407	-4.47645	0	0	1	0
315	85474	LBX2	ladybird homeobox 2	2p13.1	2.89748	-0.563647	4.06015	8.76397e-05	0.000856354	1.14106	1	0	0.929842	-0.563647	2.01828	0.0457858	0.0712454	-4.87314	0	0	1	0
316	3131	HLF	HLF transcription factor, PAR bZIP family member	17q22	3.9381	0.853409	4.81348	4.35249e-06	6.56589e-05	3.73197	1	0	1.33286	0.853409	1.99542	0.0482562	0.0746983	-5.05432	0	0	1	0
318	5325	PLAGL1	PLAG1 like zinc finger 1	6q24.2	3.77101	1.72096	4.3121	3.32988e-05	0.000370615	1.70037	1	0	1.2455	1.72096	1.76303	0.0804345	0.117192	-5.60284	0	0	1	0
321	3228	HOXC12	homeobox C12	12q13.13	6.80002	-0.949998	7.54527	9.50592e-12	4.51382e-10	16.3114	1	0	1.53478	-0.949998	1.64341	0.102909	0.145662	-5.54296	0	0	1	0
322	79190	IRX6	iroquois homeobox 6	16q12.2	3.61602	-2.33296	3.42144	0.000851551	0.00560583	-0.853323	1	0	0.944462	-2.33296	1.53162	0.128241	0.176511	-5.65469	0	0	1	0
323	6778	STAT6	signal transducer and activator of transcription 6	12q13.3	2.75666	5.75096	2.84409	0.00523526	0.0236455	-3.22635	1	0	0.807967	5.75096	1.49008	0.13882	0.189476	-6.62014	0	0	1	0
324	4010	LMX1B	LIM homeobox transcription factor 1 beta	9q33.3	2.66327	-0.179949	2.59889	0.0105216	0.0405462	-3.25648	1	0	0.95352	-0.179949	1.43754	0.15316	0.206818	-5.89841	0	0	1	0
325	6939	TCF15	transcription factor 15	20p13	5.61605	-3.60215	5.04728	1.60899e-06	2.71315e-05	4.90901	1	0	1.01839	-3.60215	1.42569	0.156545	0.210795	-5.81099	0	0	1	0
326	51087	YBX2	Y-box binding protein 2	17p13.1	2.94941	2.23858	3.87503	0.000174059	0.00152183	0.143693	1	0	0.828536	2.23858	1.42177	0.157679	0.212088	-6.1777	0	0	1	0
327	84733	CBX2	chromobox 2	17q25.3	2.06561	6.20044	3.95259	0.000130913	0.00119244	0.213133	1	0	0.373854	6.20044	1.29697	0.197122	0.257769	-6.89646	0	0	1	0
329	149483	CCDC17	coiled-coil domain containing 17	1p34.1	2.28506	0.894946	3.77118	0.000253361	0.00207287	0.054655	1	0	0.523733	0.894946	1.27152	0.205995	0.267605	-6.16808	0	0	1	0
330	196	AHR	aryl hydrocarbon receptor	7p21.1	2.57474	3.09963	2.55702	0.0118002	0.0441798	-3.7956	1	0	0.852123	3.09963	1.22137	0.224334	0.288146	-6.5977	0	0	1	0
331	688	KLF5	Kruppel like factor 5	13q22.1	2.54625	4.40064	2.60476	0.0103527	0.040029	-3.78189	1	0	0.658221	4.40064	1.11065	0.268933	0.336849	-6.96713	0	0	1	0
332	57822	GRHL3	grainyhead like transcription factor 3	1p36.11	2.60173	0.416248	3.29296	0.00130194	0.0078764	-1.43578	1	0	0.570221	0.416248	1.05729	0.292495	0.362266	-6.38439	0	0	1	0
336	57167	SALL4	spalt like transcription factor 4	20q13.2	3.29085	1.11152	4.05104	9.06954e-05	0.000884088	0.88206	1	0	0.533165	1.11152	0.808283	0.420523	0.493116	-6.64688	0	0	1	0
337	1747	DLX3	distal-less homeobox 3	17q21.33	2.65903	0.0871078	2.97891	0.0034998	0.0173407	-2.23904	1	0	0.456284	0.0871078	0.78217	0.435651	0.508121	-6.55892	0	0	1	0
342	3171	FOXA3	forkhead box A3	19q13.32	5.83132	-2.49006	7.9203	1.32822e-12	7.16146e-11	18.2859	1	0	0.260285	-2.49006	0.428524	0.669036	0.723928	-6.72038	0	0	1	0
343	64843	ISL2	ISL LIM homeobox 2	15q24.3	4.72425	-1.61522	6.32674	4.45143e-09	1.36829e-07	10.4634	1	0	0.189586	-1.61522	0.32412	0.74641	0.792305	-6.76012	0	0	1	0
344	3204	HOXA7	homeobox A7	7p15.2	3.82443	-2.85487	3.3556	0.00106001	0.00668634	-1.04912	1	0	0.150578	-2.85487	0.22759	0.820351	0.855558	-6.78795	0	0	1	0
346	2736	GLI2	GLI family zinc finger 2	2q14.2	4.93712	-0.649484	5.40994	3.25759e-07	6.60647e-06	6.26853	1	0	0.0574355	-0.649484	0.0687424	0.945309	0.956873	-6.81974	0	0	1	0
352	83439	TCF7L1	transcription factor 7 like 1	2p11.2	5.32592	0.737238	10.8891	1.22758e-19	1.45903e-17	34.1196	1	0	-0.127466	0.737238	-0.247248	0.805138	0.842919	-6.86094	0	0	1	0
353	163071	ZNF114	zinc finger protein 114	19q13.33	3.16202	-1.52675	2.87884	0.00472512	0.0217829	-2.47361	1	0	-0.206804	-1.52675	-0.286133	0.775268	0.817144	-6.77175	0	0	1	0
355	170302	ARX	aristaless related homeobox	Xp21.3	5.20952	0.18611	6.87198	2.99578e-10	1.11508e-08	12.9455	1	0	-0.438107	0.18611	-0.546524	0.585717	0.649873	-6.70066	0	0	1	0
356	5307	PITX1	paired like homeodomain 1	5q31.1	4.0051	3.36314	10.0177	1.51395e-17	1.49196e-15	29.3636	1	0	-0.211407	3.36314	-0.637609	0.52494	0.593091	-7.06209	0	0	1	0
360	1958	EGR1	early growth response 1	5q31.2	2.42581	3.69633	3.24386	0.0015266	0.00892346	-2.00032	1	0	-0.502101	3.69633	-0.897169	0.37142	0.444087	-6.93217	0	0	1	0
361	63946	DMRTC2	DMRT like family C2	19q13.2	2.81576	-3.52148	2.94013	0.00393499	0.0189745	-2.15297	1	0	-0.527362	-3.52148	-1.06367	0.289606	0.359278	-6.25972	0	0	1	0
362	4088	SMAD3	SMAD family member 3	15q22.33	1.69068	4.9448	4.38278	2.52113e-05	0.000292555	1.84436	1	0	-0.264419	4.9448	-1.09272	0.2767	0.345144	-6.93899	0	0	1	0
363	3431	SP110	SP110 nuclear body protein	2q37.1	2.47303	3.03542	5.00473	1.93245e-06	3.17663e-05	4.38796	1	0	-0.439732	3.03542	-1.0949	0.275746	0.344173	-6.58341	0	0	1	0
365	654254	ZNF732	zinc finger protein 732	4p16.3	4.9845	-1.62329	9.31583	7.17019e-16	5.88345e-14	25.5589	1	0	-0.488906	-1.62329	-1.12535	0.262681	0.33003	-6.18392	0	0	1	0
368	6672	SP100	SP100 nuclear antigen	2q37.1	2.34853	3.89351	3.40096	0.000911878	0.00590973	-1.51988	1	0	-0.859544	3.89351	-1.56636	0.11989	0.166451	-6.05399	0	0	1	0
371	84215	ZNF541	zinc finger protein 541	19q13.33	3.69838	-0.385945	5.70755	8.39572e-08	1.9485e-06	7.58336	1	0	-0.966762	-0.385945	-1.6774	0.0960602	0.137106	-5.44474	0	0	1	0
373	162979	ZNF296	zinc finger protein 296	19q13.32	2.67357	1.36765	5.81331	5.13851e-08	1.24717e-06	8.01122	1	0	-0.700792	1.36765	-1.7714	0.079026	0.115448	-5.39841	0	0	1	0
374	63948	DMRTB1	DMRT like family B with proline rich C-terminal 1	1p32.3	4.82154	-4.76812	5.86114	4.10903e-08	1.02652e-06	8.35427	1	0	-0.835517	-4.76812	-1.86641	0.064418	0.0964426	-5.12619	0	0	1	0
380	51085	MLXIPL	MLX interacting protein like	7q11.23	2.72575	1.60823	3.65134	0.00038736	0.0029499	-0.547386	1	0	-1.64819	1.60823	-2.33362	0.0212747	0.0358743	-4.24453	0	1	1	1
382	1051	CEBPB	CCAAT enhancer binding protein beta	20q13.13	2.09614	4.33183	5.86042	4.12291e-08	1.02737e-06	8.03564	1	0	-0.601131	4.33183	-2.40711	0.0175991	0.0302299	-4.58976	0	0	1	0
392	94234	FOXQ1	forkhead box Q1	6p25.3	7.54944	-1.19172	13.1593	4.72623e-25	9.6548e-23	46.3504	1	0	-1.87309	-1.19172	-2.90576	0.00436163	0.00862867	-2.75211	0	1	1	1
393	5916	RARG	retinoic acid receptor gamma	12q13.13	3.16951	3.10705	5.34896	4.27972e-07	8.37621e-06	5.79178	1	0	-1.69927	3.10705	-2.91472	0.00424647	0.00842123	-2.94941	0	1	1	1
400	7227	TRPS1	transcriptional repressor GATA binding 1	8q23.3	4.32283	5.07939	5.49699	2.20002e-07	4.6442e-06	6.33166	1	0	-2.24464	5.07939	-3.21438	0.00167837	0.00359486	-2.31607	0	1	1	1
401	2001	ELF5	E74 like ETS transcription factor 5	11p13	2.46365	3.02197	2.55596	0.0118343	0.0442533	-3.8601	1	0	-3.39913	3.02197	-3.24254	0.00153311	0.00331231	-1.92449	0	1	1	1
405	145873	MESP2	mesoderm posterior bHLH transcription factor 2	15q26.1	2.72837	0.152705	5.6743	9.78764e-08	2.25288e-06	7.47144	1	0	-1.30122	0.152705	-3.30979	0.0012323	0.00271657	-1.61808	0	0	1	0
413	147741	ZNF560	zinc finger protein 560	19p13.2	3.8227	-2.30147	2.77708	0.00636383	0.027459	-2.76365	1	0	-3.27909	-2.30147	-3.55981	0.000532315	0.00126429	-0.82771	0	1	1	1
426	3174	HNF4G	hepatocyte nuclear factor 4 gamma	8q21.13	2.44532	1.46887	2.54044	0.012344	0.0458134	-3.72531	1	0	-3.87723	1.46887	-3.983	0.000116959	0.000318832	0.576325	0	1	1	1
429	9314	KLF4	Kruppel like factor 4	9q31.2	2.25497	4.96049	5.59765	1.39146e-07	3.08687e-06	6.82901	1	0	-1.19775	4.96049	-4.15313	6.15941e-05	0.000177011	0.657774	0	0	1	0
441	51450	PRRX2	paired related homeobox 2	9q34.11	6.42241	-2.44362	9.7199	7.80801e-17	7.08902e-15	27.7719	1	0	-2.77799	-2.44362	-4.51789	1.46932e-05	4.76199e-05	2.55716	0	1	1	1
454	8463	TEAD2	TEA domain transcription factor 2	19q13.33	2.51826	3.38356	2.78264	0.00626239	0.0271647	-3.32606	1	0	-5.82524	3.38356	-5.26983	6.08287e-07	2.53057e-06	5.56992	0	1	1	1
482	7494	XBP1	X-box binding protein 1	22q12.1;22q12	2.37527	8.37416	6.9035	2.55586e-10	9.67626e-09	12.894	1	0	-1.34367	8.37416	-6.95669	1.9537e-10	1.41172e-09	12.6693	0	0	1	0
176	163051	ZNF709	zinc finger protein 709	19p13.2	-1.98326	2.71507	-5.09038	1.33521e-06	2.30297e-05	5.10167	0	1	0.819459	2.71507	5.82965	4.76108e-08	2.37745e-07	7.71414	0	0	0	1
250	84911	ZNF382	zinc finger protein 382	19q13.12	-5.82874	3.1828	-4.21753	4.80977e-05	0.000509862	1.81135	0	1	1.48712	3.1828	4.15572	6.09883e-05	0.000175295	0.612403	0	0	0	1
265	7539	ZFP37	ZFP37 zinc finger protein	9q32	-5.09247	1.86418	-3.78474	0.000241338	0.00198944	0.346796	0	1	1.53922	1.86418	3.80641	0.00022324	0.000574611	-0.478358	0	0	0	1
269	7728	ZNF175	zinc finger protein 175	19q13.41	-6.96187	3.14108	-4.97169	2.22638e-06	3.60839e-05	4.63211	0	1	1.39263	3.14108	3.69945	0.000327038	0.000812319	-0.952222	0	0	0	1
300	2103	ESRRB	estrogen related receptor beta	14q24.3	-3.41092	-2.59064	-3.2252	0.00162114	0.00934514	-1.371	0	1	1.54664	-2.59064	2.81125	0.0057633	0.0110895	-3.00706	0	0	0	1
310	2637	GBX2	gastrulation brain homeobox 2	2q37.2	-3.32386	-2.54723	-3.17338	0.00191292	0.0107654	-1.51808	0	1	1.3855	-2.54723	2.53264	0.0126076	0.0224067	-3.70313	0	0	0	1
317	728927	ZNF736	zinc finger protein 736	7q11.21	-5.45037	5.00764	-3.27145	0.00139625	0.0083076	-1.26227	0	1	0.74585	5.00764	1.94984	0.0535207	0.0817759	-5.79397	0	0	0	1
319	221833	SP8	Sp8 transcription factor	7p21.1	-5.83116	-0.209365	-3.45333	0.000765043	0.00515576	-0.701028	0	1	1.29682	-0.209365	1.68681	0.0942314	0.134849	-5.54835	0	0	0	1
320	64641	EBF2	EBF transcription factor 2	8p21.2	-3.59215	-2.32565	-2.55656	0.0118152	0.0442149	-3.11059	0	1	1.20952	-2.32565	1.64976	0.101601	0.144102	-5.47575	0	0	0	1
328	6495	SIX1	SIX homeobox 1	14q23.1	-3.07093	4.14809	-2.6129	0.0101227	0.0393101	-3.12158	0	1	0.448396	4.14809	1.27357	0.205272	0.266895	-6.75286	0	0	0	1
333	3110	MNX1	motor neuron and pancreas homeobox 1	7q36.3	-5.85122	2.02208	-4.43517	2.0474e-05	0.00024438	2.59225	0	1	0.49605	2.02208	1.05592	0.293118	0.362969	-6.62368	0	0	0	1
334	79973	ZNF442	zinc finger protein 442	19p13.2	-4.47733	0.900922	-5.34759	4.30596e-07	8.41655e-06	6.14803	0	1	0.375482	0.900922	1.04899	0.296284	0.366427	-6.44522	0	0	0	1
335	1820	ARID3A	AT-rich interaction domain 3A	19p13.3	-3.06329	3.69849	-4.20112	5.12389e-05	0.000537926	1.70949	0	1	0.24307	3.69849	1.04055	0.300169	0.370484	-6.88215	0	0	0	1
338	100131827	ZNF717	zinc finger protein 717	3p12.3	-5.91354	2.54478	-3.39461	0.000931367	0.00600202	-0.86871	0	1	0.4352	2.54478	0.744662	0.457928	0.529319	-6.96152	0	0	0	1
339	196446	MYRFL	myelin regulatory factor like	12q15	-2.60339	-0.684959	-3.15438	0.00203164	0.0112486	-1.55666	0	1	0.189337	-0.684959	0.467425	0.641041	0.699748	-6.74132	0	0	0	1
340	54738	FEV	FEV transcription factor, ETS family member	2q35	-4.81568	-1.47033	-2.98089	0.00347882	0.0172629	-2.04683	0	1	0.366185	-1.47033	0.438511	0.661802	0.717843	-6.73013	0	0	0	1
341	286380	FOXD4L3	forkhead box D4 like 3	9q21.11	-2.52544	-1.9843	-3.34095	0.00111249	0.00694588	-1.02567	0	1	0.167058	-1.9843	0.429772	0.66813	0.723147	-6.7199	0	0	0	1
345	285971	ZNF775	zinc finger protein 775	7q36.1	-2.57917	2.74014	-3.1101	0.00233534	0.0125993	-1.74104	0	1	0.0352178	2.74014	0.111759	0.911201	0.928723	-7.20127	0	0	0	1
347	1960	EGR3	early growth response 3	8p21.3	-3.44584	-1.79995	-3.06578	0.0026811	0.014051	-1.81216	0	1	-0.00772334	-1.79995	-0.0132171	0.989476	0.9916	-6.81156	0	0	0	1
348	400720	ZNF772	zinc finger protein 772	19q13.43	-2.24377	4.10092	-3.89672	0.000160794	0.00141786	0.57064	0	1	-0.00886302	4.10092	-0.04329	0.965542	0.972575	-7.47502	0	0	0	1
349	140612	ZFP28	ZFP28 zinc finger protein	19q13.43	-2.9947	3.62339	-2.98964	0.0033874	0.0169206	-2.10748	0	1	-0.0275893	3.62339	-0.0815598	0.935132	0.948383	-7.37521	0	0	0	1
350	7639	ZNF85	zinc finger protein 85	19p12	-4.09648	2.59528	-2.50968	0.0134127	0.0487555	-3.2094	0	1	-0.0822593	2.59528	-0.137277	0.891041	0.912777	-7.14166	0	0	0	1
351	126068	ZNF441	zinc finger protein 441	19p13.2	-2.04345	3.50134	-4.5085	1.52602e-05	0.000190132	2.78599	0	1	-0.041102	3.50134	-0.238873	0.81161	0.848472	-7.34207	0	0	0	1
354	29087	THYN1	thymocyte nuclear protein 1	11q25	-1.9156	5.25507	-3.29437	0.00129595	0.00785659	-1.57444	0	1	-0.0989119	5.25507	-0.430335	0.667722	0.722865	-7.56705	0	0	0	1
357	4487	MSX1	msh homeobox 1	4p16.2	-6.51253	1.58117	-4.39891	2.36502e-05	0.000277154	2.45849	0	1	-0.420686	1.58117	-0.646697	0.51906	0.587582	-6.77287	0	0	0	1
358	63876	PKNOX2	PBX/knotted 1 homeobox 2	11q24.2	-3.84914	-1.29778	-2.78984	0.00613324	0.026775	-2.53439	0	1	-0.601062	-1.29778	-0.84385	0.400428	0.473745	-6.45941	0	0	0	1
359	4772	NFATC1	nuclear factor of activated T cells 1	18q23	-6.93022	1.7169	-4.82841	4.08791e-06	6.24394e-05	4.07187	0	1	-0.527403	1.7169	-0.870142	0.385955	0.459115	-6.64514	0	0	0	1
364	126069	ZNF491	zinc finger protein 491	19p13.2	-3.42468	2.08064	-7.20067	5.64032e-11	2.38903e-09	14.4608	0	1	-0.204109	2.08064	-1.10012	0.273477	0.341712	-6.49368	0	0	0	1
366	7157	TP53	tumor protein p53	17p13.1	-8.4339	3.42139	-3.0475	0.00283698	0.0147498	-1.86473	0	1	-1.24095	3.42139	-1.36453	0.174947	0.232428	-6.34436	0	0	0	1
367	6096	RORB	RAR related orphan receptor B	9q21.13	-7.37615	1.52111	-2.95558	0.00375589	0.0182953	-2.11518	0	1	-1.78767	1.52111	-1.53342	0.127797	0.176073	-5.76475	0	0	0	1
369	5468	PPARG	peroxisome proliferator activated receptor gamma	3p25.2	-6.81732	0.409682	-3.66217	0.000372936	0.00285466	-0.0557264	0	1	-1.51557	0.409682	-1.60611	0.11087	0.155372	-5.57776	0	0	0	1
370	7568	ZNF20	zinc finger protein 20	19p13.2	-2.73786	-0.504798	-7.46018	1.47939e-11	6.7314e-10	15.6817	0	1	-0.301028	-0.504798	-1.65007	0.101537	0.144027	-5.49583	0	0	0	1
372	162968	ZNF497	zinc finger protein 497	19q13.43	-2.94919	1.70204	-5.14847	1.03699e-06	1.82499e-05	5.33815	0	1	-0.412892	1.70204	-1.71569	0.088792	0.127933	-5.57089	0	0	0	1
375	7547	ZIC3	Zic family member 3	Xq26.3	-4.01495	-2.48475	-2.68003	0.00839331	0.0340226	-2.8158	0	1	-1.47986	-2.48475	-1.88994	0.0611715	0.0921165	-5.06145	0	0	0	1
376	3727	JUND	JunD proto-oncogene, AP-1 transcription factor subunit	19p13.11	-1.90469	7.0254	-3.73263	0.00029074	0.00233294	-0.424684	0	1	-0.500655	7.0254	-2.08718	0.0389829	0.0617623	-5.61381	0	0	0	1
377	9935	MAFB	MAF bZIP transcription factor B	20q12	-4.51375	4.3575	-3.4942	0.000666233	0.00460539	-0.624262	0	1	-0.875374	4.3575	-2.23388	0.0273385	0.0450118	-4.99254	0	0	0	1
378	57336	ZNF287	zinc finger protein 287	17p11.2	-3.20691	3.42435	-6.0506	1.67988e-08	4.54402e-07	9.20322	0	1	-0.430664	3.42435	-2.26885	0.0250594	0.0416016	-4.76437	0	0	0	1
379	8320	EOMES	eomesodermin	3p24.1	-4.36295	-1.52978	-3.10066	0.00240533	0.0128742	-1.7175	0	1	-1.69845	-1.52978	-2.31972	0.0220416	0.0370273	-4.19111	0	1	0	2
381	91464	ISX	intestine specific homeobox	22q12.3	-4.24921	0.669473	-3.80147	0.000227246	0.00188916	0.402472	0	1	-1.25485	0.669473	-2.35465	0.020159	0.034128	-4.17979	0	0	0	1
383	140467	ZNF358	zinc finger protein 358	19p13.2	-2.85826	5.6795	-3.32714	0.00116419	0.00719763	-1.40072	0	1	-0.758685	5.6795	-2.41989	0.0170207	0.0293084	-4.7724	0	0	0	1
384	116448	OLIG1	oligodendrocyte transcription factor 1	21q22.11	-4.26188	-1.66437	-3.34143	0.00111075	0.00693723	-1.03224	0	1	-1.63012	-1.66437	-2.44888	0.0157714	0.027354	-3.89836	0	1	0	2
385	282890	ZNF311	zinc finger protein 311	6p22.1	0.438104	0.747465	0.317545	0.751381	0.847321	-6.3087	0	0	-2.12428	0.747465	-2.50926	0.0134278	0.0236938	-3.77884	0	1	0	1
386	2295	FOXF2	forkhead box F2	6p25.3	-1.05265	-2.56183	-0.761414	0.4479	0.609645	-5.87949	0	0	-1.77161	-2.56183	-2.5342	0.0125544	0.0223233	-3.7067	0	1	0	1
387	118472	ZNF511	zinc finger protein 511	10q26.3	-1.64072	4.28747	-3.40641	0.000895432	0.00581853	-1.129	0	1	-0.531802	4.28747	-2.609	0.0102323	0.018592	-4.13544	0	0	0	1
388	4488	MSX2	msh homeobox 2	5q35.2	-6.78816	0.396631	-3.39661	0.00092519	0.00597625	-0.872888	0	1	-2.78527	0.396631	-2.69366	0.0080766	0.0150333	-3.31966	0	1	0	2
389	65986	ZBTB10	zinc finger and BTB domain containing 10	8q21.13	-1.7323	6.95798	-2.77112	0.00647421	0.0278495	-3.31326	0	1	-0.836601	6.95798	-2.75682	0.00674627	0.0127625	-4.04805	0	0	0	1
390	1390	CREM	cAMP responsive element modulator	10p11.21	-1.86907	3.63903	-4.34822	2.88958e-05	0.000328127	2.16738	0	1	-0.510082	3.63903	-2.84356	0.0052435	0.0101802	-3.39181	0	0	0	1
391	10538	BATF	basic leucine zipper ATF-like transcription factor	14q24.3	1.39441	-2.20992	1.14787	0.253301	0.417751	-5.56351	0	0	-1.85626	-2.20992	-2.87931	0.00471851	0.00926738	-2.82316	0	1	0	1
394	7544	ZFY	zinc finger protein Y-linked	Yp11.2	0.793772	3.2227	0.86943	0.386343	0.553074	-6.51037	0	0	-2.34103	3.2227	-3.03374	0.00295987	0.00604259	-2.61589	0	1	0	1
395	145258	GSC	goosecoid homeobox	14q32.13	1.99374	-0.115783	1.95786	0.0525607	0.13686	-4.58399	0	0	-2.14127	-0.115783	-3.10226	0.00239333	0.00497885	-2.20888	0	1	0	1
396	169270	ZNF596	zinc finger protein 596	8p23.3	-1.81511	2.52582	-2.72464	0.00739682	0.0308278	-2.80882	0	1	-0.966998	2.52582	-3.11967	0.00226636	0.00473128	-2.39111	0	0	0	1
397	90993	CREB3L1	cAMP responsive element binding protein 3 like 1	11p11.2	0.752324	3.97777	0.731361	0.465981	0.6263	-6.75002	0	0	-2.83528	3.97777	-3.12309	0.00224212	0.00468517	-2.44296	0	1	0	1
398	148254	ZNF555	zinc finger protein 555	19p13.3	-3.98366	3.05739	-7.4894	1.27115e-11	5.83808e-10	15.8859	0	1	-0.595032	3.05739	-3.16853	0.00194257	0.0041047	-2.39116	0	0	0	1
399	23316	CUX2	cut like homeobox 2	12q24.11-q24.12	-9.11982	2.99479	-3.69863	0.00032799	0.00257185	0.0603174	0	1	-3.4784	2.99479	-3.20155	0.0017487	0.00373001	-2.07277	0	1	0	2
402	50805	IRX4	iroquois homeobox 4	5p15.33	-6.95048	1.08125	-3.28972	0.00131573	0.00794178	-1.18577	0	1	-3.51456	1.08125	-3.26306	0.00143474	0.00312282	-1.75724	0	1	0	2
403	121549	ASCL4	achaete-scute family bHLH transcription factor 4	12q23.3	-1.78027	-4.46571	-1.86886	0.0640738	0.157838	-4.51997	0	0	-1.58827	-4.46571	-3.26541	0.00142386	0.00310051	-1.74822	0	1	0	1
404	11023	VAX1	ventral anterior homeobox 1	10q25.3	2.64473	-3.52737	2.25422	0.0259915	0.0809631	-3.78558	0	0	-1.99121	-3.52737	-3.27556	0.00137777	0.00301085	-1.71164	0	1	0	1
406	9971	NR1H4	nuclear receptor subfamily 1 group H member 4	12q23.1	-1.57796	-3.41025	-1.12417	0.263177	0.428167	-5.55676	0	0	-2.34806	-3.41025	-3.31782	0.00120031	0.00265291	-1.58415	0	1	0	1
407	2120	ETV6	ETS variant 6	12p13.2	0.706858	4.33274	0.961648	0.338155	0.506535	-6.59072	0	0	-1.71404	4.33274	-3.32711	0.00116431	0.00258121	-2.08662	0	1	0	1
408	3142	HLX	H2.0 like homeobox	1q41	-4.13643	-0.786651	-3.66284	0.000372055	0.00285126	-0.043027	0	1	-1.96802	-0.786651	-3.42806	0.000832881	0.00190302	-1.2379	0	1	0	2
409	55552	ZNF823	zinc finger protein 823	19p13.2	-1.62355	3.49834	-4.83145	4.03605e-06	6.17402e-05	4.00631	0	1	-0.497093	3.49834	-3.42857	0.000831469	0.00190024	-1.68037	0	0	0	1
410	283078	MKX	mohawk homeobox	10p12.1	-4.97841	-1.32956	-4.5898	1.0977e-05	0.000143234	3.16228	0	1	-1.95302	-1.32956	-3.44034	0.000799232	0.00183426	-1.19261	0	1	0	2
411	90075	ZNF30	zinc finger protein 30	19q13.11	-1.75236	3.54817	-2.76991	0.00649688	0.0279286	-2.82619	0	1	-0.99448	3.54817	-3.4737	0.000714193	0.00165576	-1.50343	0	0	0	1
412	7022	TFAP2C	transcription factor AP-2 gamma	20q13.31	1.67856	3.97496	2.02395	0.0451893	0.122034	-5.02346	0	0	-2.75381	3.97496	-3.51081	0.000629614	0.00147466	-1.21994	0	1	0	1
414	6097	RORC	RAR related orphan receptor C	1q21.3	0.757278	4.84812	1.05236	0.294742	0.461934	-6.51941	0	0	-1.75465	4.84812	-3.56342	0.000525746	0.0012499	-1.38397	0	1	0	1
415	140628	GATA5	GATA binding protein 5	20q13.33	-3.01257	-2.83329	-2.10989	0.0369395	0.105367	-4.06394	0	0	-2.62993	-2.83329	-3.59881	0.000465211	0.00111887	-0.699623	0	1	0	1
416	168544	ZNF467	zinc finger protein 467	7q36.1	-2.46133	3.05483	-1.77545	0.0783518	0.182967	-4.82305	0	0	-2.58047	3.05483	-3.65231	0.000386057	0.000943658	-0.68264	0	1	0	1
417	90576	ZNF799	zinc finger protein 799	19p13.2	-2.07123	3.66427	-4.90238	2.99114e-06	4.7078e-05	4.30865	0	1	-0.638625	3.66427	-3.66522	0.000368956	0.00090649	-0.914985	0	0	0	1
418	283933	ZNF843	zinc finger protein 843	16p11.2	-1.01063	-1.17416	-1.17516	0.242249	0.405714	-5.49347	0	0	-1.61612	-1.17416	-3.69166	0.000336154	0.000832784	-0.38595	0	1	0	1
419	6927	HNF1A	HNF1 homeobox A	12q24.31	0.73799	-0.965406	0.426242	0.670693	0.791906	-6.19013	0	0	-3.71793	-0.965406	-3.74887	0.0002744	0.000692124	-0.204714	0	1	0	1
420	389058	SP5	Sp5 transcription factor	2q31.1	-2.56181	1.85012	-2.26281	0.0254405	0.0796861	-3.78374	0	0	-2.0808	1.85012	-3.76424	0.000259737	0.000658271	-0.227269	0	1	0	1
421	284390	ZNF763	zinc finger protein 763	19p13.2	-3.24958	1.78383	-6.1624	9.84538e-09	2.83938e-07	9.65578	0	1	-0.88134	1.78383	-3.87767	0.000172395	0.00045478	0.0851306	0	0	0	1
422	220929	ZNF438	zinc finger protein 438	10p11.23	-1.82403	2.11339	-1.81571	0.0719041	0.171944	-4.7142	0	0	-1.98628	2.11339	-3.87955	0.000171214	0.000452001	0.122272	0	1	0	1
423	80032	ZNF556	zinc finger protein 556	19p13.3	-2.6706	-1.38327	-1.61578	0.108761	0.231336	-4.9125	0	0	-3.24925	-1.38327	-3.88154	0.000169971	0.000449111	0.247642	0	1	0	1
424	5076	PAX2	paired box 2	10q24.31	-3.13108	-3.36896	-3.2796	0.00135978	0.00813752	-1.21447	0	1	-1.93534	-3.36896	-3.92202	0.000146538	0.000391894	0.382555	0	1	0	2
425	84667	HES7	hes family bHLH transcription factor 7	17p13.1	-0.134718	-3.0129	-0.132884	0.894507	0.936496	-6.1446	0	0	-2.02058	-3.0129	-3.9506	0.000131881	0.000356143	0.486225	0	1	0	1
427	7772	ZNF229	zinc finger protein 229	19q13.31	1.81835	2.783	1.90378	0.0593266	0.149391	-5.21327	0	0	-4.27001	2.783	-4.0654	8.5922e-05	0.000240133	0.821185	0	1	0	1
428	57801	HES4	hes family bHLH transcription factor 4	1p36.33	1.34974	3.44914	1.68149	0.0952603	0.210444	-5.59439	0	0	-3.27165	3.44914	-4.09795	7.59821e-05	0.000214185	0.859135	0	1	0	1
430	90874	ZNF697	zinc finger protein 697	1p12	-2.59467	4.83145	-3.71616	0.00030825	0.00244642	-0.123486	0	1	-1.15623	4.83145	-4.20749	4.9996e-05	0.000145947	0.791574	0	0	0	1
431	57593	EBF4	EBF family member 4	20p13	-0.14047	2.95777	-0.171908	0.863798	0.91721	-6.62942	0	0	-2.44716	2.95777	-4.24665	4.2973e-05	0.000127264	1.40716	0	1	0	1
432	8456	FOXN1	forkhead box N1	17q11.2	2.3861	-1.74626	2.31826	0.0221231	0.071558	-3.72726	0	0	-2.57177	-1.74626	-4.31089	3.34569e-05	0.000101129	1.78321	0	1	0	1
433	4862	NPAS2	neuronal PAS domain protein 2	2q11.2	0.869917	3.92147	1.08614	0.279586	0.445789	-6.40635	0	0	-3.27292	3.92147	-4.31738	3.26177e-05	9.88511e-05	1.61955	0	1	0	1
434	54345	SOX18	SRY-box 18	20q13.33	-3.16745	-3.38381	-3.01142	0.00316963	0.016066	-1.96483	0	1	-2.38052	-3.38381	-4.40198	2.33642e-05	7.27986e-05	2.11545	0	1	0	2
435	9496	TBX4	T-box 4	17q23.2	0.65995	-1.92181	0.585165	0.559533	0.704662	-6.00155	0	0	-2.55827	-1.92181	-4.43335	2.06232e-05	6.49287e-05	2.24243	0	1	0	1
436	347853	TBX10	T-box 10	11q13.2	-3.68036	-0.630541	-2.28263	0.0242079	0.0765834	-3.70192	0	0	-3.60858	-0.630541	-4.44487	1.9697e-05	6.22228e-05	2.2804	0	1	0	1
437	79191	IRX3	iroquois homeobox 3	16q12.2	-3.28839	4.94308	-3.82043	0.000212229	0.00178895	0.27503	0	1	-1.39917	4.94308	-4.46652	1.80635e-05	5.75258e-05	1.76441	0	0	0	1
438	55897	MESP1	mesoderm posterior bHLH transcription factor 1	15q26.1	0.158853	4.29128	0.205674	0.837393	0.901065	-6.95181	0	0	-2.91626	4.29128	-4.46806	1.79526e-05	5.72096e-05	2.11008	0	1	0	1
439	26974	ZNF285	zinc finger protein 285	19q13.31	-1.18574	2.8629	-1.50075	0.136039	0.271668	-5.37801	0	0	-1.99798	2.8629	-4.47853	1.72143e-05	5.50626e-05	2.23638	0	1	0	1
440	114821	ZBED9	zinc finger BED-type containing 9	6p22.1	-0.251993	3.30434	-0.453416	0.651065	0.77726	-6.59775	0	0	-1.61443	3.30434	-4.5028	1.56142e-05	5.04048e-05	2.2493	0	1	0	1
442	6899	TBX1	T-box 1	22q11.21	1.74163	3.1597	2.04298	0.0432381	0.117999	-4.93657	0	0	-4.29301	3.1597	-4.59259	1.08531e-05	3.59833e-05	2.79523	0	1	0	1
443	138715	ARID3C	AT-rich interaction domain 3C	9p13.3	-1.88113	-2.54406	-2.24031	0.0269059	0.083072	-3.79005	0	0	-1.99565	-2.54406	-4.67367	7.78443e-06	2.64806e-05	3.17266	0	1	0	1
444	168620	BHLHA15	basic helix-loop-helix family member a15	7q21.3	-1.19954	1.76978	-1.07708	0.283597	0.450371	-5.81297	0	0	-3.13228	1.76978	-4.70639	6.80075e-06	2.34105e-05	3.25147	0	1	0	1
445	10660	LBX1	ladybird homeobox 1	10q24.32	-2.67178	-4.00515	-2.80833	0.00581241	0.0257075	-2.49669	0	1	-2.30317	-4.00515	-4.7319	6.11825e-06	2.12213e-05	3.38901	0	1	0	2
446	147686	ZNF418	zinc finger protein 418	19q13.43	-1.91234	2.08902	-1.79108	0.0757947	0.178703	-4.80452	0	0	-2.78702	2.08902	-4.7751	5.11093e-06	1.79689e-05	3.47682	0	1	0	1
447	1746	DLX2	distal-less homeobox 2	2q31.1	-2.16627	2.44048	-1.99936	0.0478228	0.127284	-4.42653	0	0	-2.75975	2.44048	-4.77801	5.0491e-06	1.77674e-05	3.47181	0	1	0	1
448	284370	ZNF615	zinc finger protein 615	19q13.41	-2.22403	5.04905	-3.33855	0.00112131	0.00698463	-1.40164	0	1	-1.44348	5.04905	-4.86891	3.44644e-06	1.25117e-05	3.37884	0	0	0	1
449	3209	HOXA13	homeobox A13	7p15.2	-3.30629	3.898	-1.84366	0.0676929	0.164379	-4.77184	0	0	-5.16521	3.898	-4.87596	3.34527e-06	1.21692e-05	3.89228	0	1	0	1
450	668	FOXL2	forkhead box L2	3q22.3	-4.76173	-1.3691	-3.07935	0.0025705	0.0135669	-1.77352	0	1	-3.85985	-1.3691	-4.87777	3.31988e-06	1.20891e-05	3.98222	0	1	0	2
451	80110	ZNF614	zinc finger protein 614	19q13.41	-1.5917	5.0484	-3.13692	0.0021467	0.0117694	-2.0856	0	1	-1.23266	5.0484	-5.00485	1.93146e-06	7.33925e-06	3.92386	0	0	0	1
452	222546	RFX6	regulatory factor X6	6q22.1	-5.66753	-1.05155	-3.37868	0.00098203	0.0062752	-0.920717	0	1	-4.37121	-1.05155	-5.10173	1.27107e-06	4.9857e-06	4.89813	0	1	0	2
453	4149	MAX	MYC associated factor X	14q23.3	-7.7928	5.50011	-11.4547	5.38962e-21	7.33999e-19	35.8079	0	1	-0.775903	5.50011	-5.13297	1.10952e-06	4.40461e-06	4.32547	0	0	0	1
455	79898	ZNF613	zinc finger protein 613	19q13.41	-1.88269	4.39229	-2.62656	0.00974649	0.038159	-3.31913	0	1	-1.98995	4.39229	-5.34674	4.3224e-07	1.84476e-06	5.57318	0	1	0	2
456	1389	CREBL2	cAMP responsive element binding protein like 2	12p13.1	-1.61618	4.7776	-1.90982	0.0585365	0.147971	-5.09865	0	0	-2.93808	4.7776	-5.38026	3.72121e-07	1.6059e-06	5.68899	0	1	0	1
457	4791	NFKB2	nuclear factor kappa B subunit 2	10q24.32	-0.431845	4.73857	-0.878147	0.381614	0.548588	-6.56121	0	0	-1.77062	4.73857	-5.55195	1.71412e-07	7.80918e-07	6.40016	0	1	0	1
458	30812	SOX8	SRY-box 8	16p13.3	-4.48744	-1.17158	-2.96262	0.00367686	0.0180132	-2.08503	0	1	-4.2929	-1.17158	-5.59981	1.37779e-07	6.3922e-07	7.039	0	1	0	2
459	2737	GLI3	GLI family zinc finger 3	7p14.1	0.911421	1.03975	0.683951	0.495321	0.651628	-6.31558	0	0	-5.59274	1.03975	-5.71147	8.24504e-08	3.95919e-07	7.52198	0	1	0	1
460	10362	HMG20B	high mobility group 20B	19p13.3	-0.583612	7.40134	-1.09058	0.277637	0.443671	-6.53095	0	0	-1.65104	7.40134	-5.75375	6.77902e-08	3.3013e-07	6.96896	0	1	0	1
461	161882	ZFPM1	zinc finger protein, FOG family member 1	16q24.2	-1.97056	2.58401	-2.81991	0.00561952	0.0250213	-2.58134	0	1	-2.06441	2.58401	-5.77639	6.10245e-08	2.99487e-07	7.70995	0	1	0	2
462	3663	IRF5	interferon regulatory factor 5	7q32.1	-1.87237	3.14001	-3.18774	0.00182751	0.0103582	-1.62407	0	1	-1.70862	3.14001	-5.85457	4.23755e-08	2.13467e-07	7.99436	0	1	0	2
463	6909	TBX2	T-box 2	17q23.2	-3.77735	2.21463	-2.33121	0.0214059	0.0698131	-3.61495	0	0	-4.78887	2.21463	-5.92929	2.98352e-08	1.54788e-07	8.49913	0	1	0	1
464	8531	YBX3	Y-box binding protein 3	12p13.2	-0.479472	6.10287	-0.626976	0.531863	0.682035	-6.87708	0	0	-3.34761	6.10287	-6.0105	2.03239e-08	1.08073e-07	8.46995	0	1	0	1
465	59348	ZNF350	zinc finger protein 350	19q13.41	-1.88377	5.05863	-2.66511	0.00875272	0.0351381	-3.3572	0	1	-2.41735	5.05863	-6.03784	1.785e-08	9.59849e-08	8.62482	0	1	0	2
466	1052	CEBPD	CCAAT enhancer binding protein delta	8q11.21	-0.884554	4.58417	-1.50705	0.13442	0.269375	-5.76242	0	0	-2.47176	4.58417	-6.04534	1.72241e-08	9.27717e-08	8.75365	0	1	0	1
467	116039	OSR2	odd-skipped related transciption factor 2	8q22.2	0.655487	3.32149	1.13629	0.258093	0.42288	-6.27972	0	0	-3.21915	3.32149	-6.07293	1.51041e-08	8.2211e-08	9.06412	0	1	0	1
468	1050	CEBPA	CCAAT enhancer binding protein alpha	19q13.11	-0.763845	3.77039	-0.894177	0.373012	0.540348	-6.45167	0	0	-4.67447	3.77039	-6.19394	8.46053e-09	4.76506e-08	9.65068	0	1	0	1
469	59335	PRDM12	PR/SET domain 12	9q34.12	-0.322854	-1.96759	-0.502993	0.615889	0.749872	-6.03446	0	0	-2.04808	-1.96759	-6.26504	6.00375e-09	3.46905e-08	10.079	0	1	0	1
470	147837	ZNF563	zinc finger protein 563	19p13.2	-1.70938	2.20221	-3.82166	0.000211283	0.0017829	0.398586	0	1	-1.39096	2.20221	-6.28533	5.44215e-09	3.15944e-08	10.0566	0	0	0	1
471	147948	ZNF582	zinc finger protein 582	19q13.43	-1.63242	1.86714	-2.21601	0.0285715	0.0871407	-3.95197	0	0	-2.51373	1.86714	-6.31055	4.81572e-09	2.81745e-08	10.2449	0	1	0	1
472	5017	OVOL1	ovo like transcriptional repressor 1	11q13.1	0.767519	3.34871	1.63738	0.104163	0.224206	-5.59459	0	0	-2.61058	3.34871	-6.34662	4.04134e-09	2.3944e-08	10.3184	0	1	0	1
473	4831	NME2	NME/NM23 nucleoside diphosphate kinase 2	17q21.33	0.205485	5.50708	0.465908	0.642124	0.770997	-6.9565	0	0	-1.80601	5.50708	-6.37284	3.55684e-09	2.12662e-08	10.0764	0	1	0	1
474	201254	CENPX	centromere protein X	17q25.3	0.37752	6.63777	0.81759	0.415207	0.580709	-6.78913	0	0	-1.72163	6.63777	-6.44692	2.47628e-09	1.51143e-08	10.286	0	1	0	1
475	22882	ZHX2	zinc fingers and homeoboxes 2	8q24.13	-0.393513	4.65395	-0.848978	0.397579	0.564259	-6.56779	0	0	-2.09743	4.65395	-6.495	1.95569e-09	1.2114e-08	10.8486	0	1	0	1
476	147912	SIX5	SIX homeobox 5	19q13.32	-0.141525	4.68381	-0.237381	0.812765	0.884868	-6.96881	0	0	-3.26338	4.68381	-6.54021	1.56541e-09	9.86482e-09	11.1538	0	1	0	1
477	80108	ZFP2	ZFP2 zinc finger protein	5q35.3	-5.52714	0.505348	-6.91804	2.37505e-10	9.02657e-09	13.117	0	1	-2.63721	0.505348	-6.54036	1.56423e-09	9.86053e-09	11.3729	0	1	0	2
478	155054	ZNF425	zinc finger protein 425	7q36.1	-3.35669	1.9894	-4.48182	1.69887e-05	0.000208099	2.75863	0	1	-2.33007	1.9894	-6.65741	8.76266e-10	5.72433e-09	11.879	0	1	0	2
479	2128	EVX1	even-skipped homeobox 1	7p15.2	-2.70082	0.445468	-1.88634	0.0616594	0.153764	-4.47438	0	0	-4.90373	0.445468	-6.85455	3.27047e-10	2.28409e-09	12.8916	0	1	0	1
480	84159	ARID5B	AT-rich interaction domain 5B	10q21.2	-2.46294	5.95217	-4.7253	6.28798e-06	8.89708e-05	3.38278	0	1	-1.59925	5.95217	-6.85711	3.22863e-10	2.2597e-09	12.3448	0	1	0	2
481	10481	HOXB13	homeobox B13	17q21.32	-0.297684	7.00519	-0.310559	0.756673	0.850769	-7.0982	0	0	-7.4477	7.00519	-6.88467	2.81037e-10	1.98467e-09	12.9368	0	1	0	1
483	284306	ZNF547	zinc finger protein 547	19q13.43	-0.429553	2.44076	-0.967583	0.335193	0.503459	-6.03054	0	0	-1.93614	2.44076	-7.12015	8.51417e-11	6.53253e-10	14.1364	0	1	0	1
484	26298	EHF	ETS homologous factor	11p13	0.711924	7.27391	1.02088	0.309358	0.476952	-6.65447	0	0	-3.02033	7.27391	-7.15342	7.18333e-11	5.56807e-10	13.7681	0	1	0	1
485	163059	ZNF433	zinc finger protein 433	19p13.2	-2.28431	3.28009	-5.21432	7.77073e-07	1.42289e-05	5.59348	0	1	-1.4261	3.28009	-7.15694	7.05516e-11	5.47522e-10	14.2034	0	0	0	1
486	6256	RXRA	retinoid X receptor alpha	9q34.2	0.282865	6.33489	0.50869	0.611901	0.746826	-6.98696	0	0	-2.52876	6.33489	-7.1627	6.85059e-11	5.32912e-10	13.9078	0	1	0	1
487	7005	TEAD3	TEA domain transcription factor 3	6p21.31	0.785309	5.16409	1.7254	0.0870229	0.19754	-5.60355	0	0	-2.64901	5.16409	-7.25322	4.3072e-11	3.47036e-10	14.5893	0	1	0	1
488	6493	SIM2	SIM bHLH transcription factor 2	21q22.13	-1.99882	6.20704	-2.60254	0.0104164	0.040196	-3.70359	0	1	-4.30692	6.20704	-7.45137	1.54854e-11	1.31351e-10	15.6069	0	1	0	2
489	28999	KLF15	Kruppel like factor 15	3q21.3	-5.28893	3.1392	-3.84408	0.000194809	0.00167048	0.52978	0	1	-4.94556	3.1392	-7.50552	1.169e-11	1.00992e-10	16.1083	0	1	0	2
490	4609	MYC	MYC proto-oncogene, bHLH transcription factor	8q24.21	-11.923	5.84732	-6.82596	3.77567e-10	1.3712e-08	12.7025	0	1	-4.13653	5.84732	-7.53498	1.00287e-11	8.73714e-11	16.0018	0	1	0	2
491	51043	ZBTB7B	zinc finger and BTB domain containing 7B	1q21.3	-0.487114	7.10137	-1.09592	0.275303	0.441314	-6.51913	0	0	-1.84042	7.10137	-7.54605	9.46729e-12	8.32196e-11	15.7336	0	1	0	1
492	1745	DLX1	distal-less homeobox 1	2q31.1	-4.37459	4.60764	-3.9317	0.000141405	0.00127382	0.713629	0	1	-4.52931	4.60764	-8.03803	7.1194e-13	7.34448e-12	18.7659	0	1	0	2
493	7068	THRB	thyroid hormone receptor beta	3p24.2	-1.32297	4.23146	-2.07941	0.0397038	0.110727	-4.67429	0	0	-4.048	4.23146	-8.26721	2.09993e-13	2.31749e-12	19.9847	0	1	0	1
494	10365	KLF2	Kruppel like factor 2	19p13.11	0.981473	1.26826	2.50994	0.0134032	0.0487481	-3.50795	0	0	-2.328	1.26826	-8.27382	2.02702e-13	2.23954e-12	20.0908	0	1	0	1
495	51333	ZNF771	zinc finger protein 771	16p11.2	-1.36402	2.80284	-3.25971	0.00145038	0.00855701	-1.44607	0	0	-1.88661	2.80284	-8.29804	1.78066e-13	1.98074e-12	20.1462	0	1	0	1
496	687	KLF9	Kruppel like factor 9	9q21.12	-2.25737	4.94682	-3.57828	0.000499473	0.00362918	-0.698949	0	1	-3.66997	4.94682	-8.90981	6.56488e-15	8.61163e-14	23.3358	0	1	0	2
497	60436	TGIF2	TGFB induced factor homeobox 2	20q11.23	-0.379551	4.31734	-0.7827	0.435341	0.598532	-6.60134	0	0	-3.93149	4.31734	-9.18295	1.48256e-15	2.12378e-14	24.8641	0	1	0	1
498	3169	FOXA1	forkhead box A1	14q21.1	-0.72965	8.57818	-2.11124	0.0368209	0.105062	-4.96676	0	0	-1.6672	8.57818	-9.19899	1.3582e-15	1.95419e-14	24.4338	0	1	0	1
499	2063	NR2F6	nuclear receptor subfamily 2 group F member 6	19p13.11	-0.991654	6.29303	-2.31052	0.022562	0.0726661	-4.43632	0	0	-2.34715	6.29303	-9.29158	8.18749e-16	1.20725e-14	25.1223	0	1	0	1
500	64764	CREB3L2	cAMP responsive element binding protein 3 like 2	7q33	-0.210625	6.68149	-0.600811	0.549096	0.696348	-6.93113	0	0	-1.87748	6.68149	-9.44605	3.51354e-16	5.40848e-15	25.8838	0	1	0	1
501	7704	ZBTB16	zinc finger and BTB domain containing 16	11q23.2	-11.7906	4.38944	-7.77117	2.91501e-12	1.51233e-10	17.2464	0	1	-6.65631	4.38944	-9.58135	1.67215e-16	2.64884e-15	27.0293	0	1	0	2
502	159296	NKX2-3	NK2 homeobox 3	10q24.2	-4.96466	-1.49268	-4.6316	9.25369e-06	0.000123423	3.32027	0	1	-5.22857	-1.49268	-9.67321	1.00937e-16	1.64408e-15	27.5326	0	1	0	2
503	79977	GRHL2	grainyhead like transcription factor 2	8q22.3	-0.582476	7.1946	-1.05341	0.294265	0.461482	-6.57109	0	0	-3.4537	7.1946	-9.78446	5.47358e-17	9.22186e-16	27.814	0	1	0	1
504	2624	GATA2	GATA binding protein 2	3q21.3	-9.35892	6.08337	-5.8946	3.51233e-08	8.92232e-07	8.47599	0	1	-5.83889	6.08337	-9.86589	3.49579e-17	6.08845e-16	28.5152	0	1	0	2
505	100128927	ZBTB42	zinc finger and BTB domain containing 42	14q32.33	0.616108	4.96799	1.72875	0.0864184	0.196532	-5.59027	0	0	-2.93587	4.96799	-9.88964	3.06707e-17	5.38e-16	28.5959	0	1	0	1
506	6926	TBX3	T-box 3	12q24.21	-3.00279	7.32936	-4.39883	2.36579e-05	0.000277154	1.97118	0	1	-4.39992	7.32936	-10.3996	1.83839e-18	3.64536e-17	31.2567	0	1	0	2
507	25803	SPDEF	SAM pointed domain containing ETS transcription factor	6p21.31	-1.06285	6.47529	-1.62771	0.106203	0.227299	-5.81167	0	0	-7.51141	6.47529	-10.4557	1.34796e-18	2.72806e-17	31.7589	0	1	0	1
508	7764	ZNF217	zinc finger protein 217	20q13.2	-0.433504	6.06599	-0.843519	0.400612	0.566716	-6.73213	0	0	-5.14109	6.06599	-10.4625	1.29847e-18	2.63333e-17	31.7714	0	1	0	1
509	7026	NR2F2	nuclear receptor subfamily 2 group F member 2	15q26.2	-0.531029	4.84656	-1.25068	0.213477	0.372929	-6.21438	0	0	-3.82287	4.84656	-10.4761	1.20466e-18	2.46346e-17	31.8423	0	1	0	1
510	4784	NFIX	nuclear factor I X	19p13.13	-1.00605	7.54163	-1.92464	0.0566345	0.144446	-5.29921	0	0	-3.6447	7.54163	-11.3484	9.69573e-21	2.47905e-19	36.3785	0	1	0	1
511	148327	CREB3L4	cAMP responsive element binding protein 3 like 4	1q21.3	-0.474464	6.76715	-1.21662	0.226129	0.387879	-6.37256	0	0	-2.7753	6.76715	-11.5997	2.42187e-21	6.62418e-20	37.7707	0	1	0	1
512	5978	REST	RE1 silencing transcription factor	4q12	0.503386	4.99448	1.35683	0.177375	0.32872	-6.15429	0	0	-4.32032	4.99448	-11.7786	9.03051e-22	2.56663e-20	38.9581	0	1	0	1
513	367	AR	androgen receptor	Xq12	-3.81774	6.88967	-5.16762	9.53718e-07	1.70651e-05	5.02173	0	1	-10.2876	6.88967	-12.3102	4.85941e-23	1.55208e-21	41.7993	0	1	0	2
514	4824	NKX3-1	NK3 homeobox 1	8p21.2	-5.42427	7.97996	-7.85708	1.85448e-12	9.82925e-11	17.9087	0	1	-8.57206	7.97996	-14.7688	8.55799e-29	4.49948e-27	54.901	0	1	0	2

## Sheet: 108TFs_CentralMean
Inter phenotype differential Griffin score analysis summary (108 TF restricted analysis)
	Log2FC	p-value	p-adjusted
ASCL1_TFBS_Central-Mean	0.362726	2.6805e-05	0.000578988
REST_TFBS_Central-Mean	-0.765702	2.6805e-05	0.000578988
NEUROG2_TFBS_Central-Mean	0.101359	2.6805e-05	0.000578988
HNF4G_TFBS_Central-Mean	-0.297717	2.6805e-05	0.000578988
HOXB13_TFBS_Central-Mean	-0.487874	2.6805e-05	0.000578988
AR_TFBS_Central-Mean	-0.557238	5.361e-05	0.000827125
GRHL2_TFBS_Central-Mean	-0.653271	5.361e-05	0.000827125
FOXA1_TFBS_Central-Mean	-0.56987	0.00010722	0.00128664
NKX3-1_TFBS_Central-Mean	-0.375484	0.00010722	0.00128664
TCF4_TFBS_Central-Mean	0.105218	0.000187635	0.00184223
RUNX1_TFBS_Central-Mean	0.0799369	0.000187635	0.00184223
ZNF217_TFBS_Central-Mean	-0.265699	0.00032166	0.00267225
PGR_TFBS_Central-Mean	-0.327125	0.00032166	0.00267225
NR3C1_TFBS_Central-Mean	-0.195138	0.000804149	0.00620344
FOXA2_TFBS_Central-Mean	-0.212808	0.00117942	0.00849182
HNF1A_TFBS_Central-Mean	-0.16086	0.00171552	0.0102931
RARG_TFBS_Central-Mean	-0.131803	0.00171552	0.0102931
GATA3_TFBS_Central-Mean	-0.177289	0.00171552	0.0102931
TRPS1_TFBS_Central-Mean	-0.146276	0.00241245	0.0118429
SOX5_TFBS_Central-Mean	-0.0735874	0.00241245	0.0118429
POU3F2_TFBS_Central-Mean	0.0603913	0.00241245	0.0118429
E2F8_TFBS_Central-Mean	-0.112369	0.00241245	0.0118429
ONECUT2_TFBS_Central-Mean	-0.0832865	0.00335062	0.0150778
EBF1_TFBS_Central-Mean	0.0747155	0.00335062	0.0150778
FLI1_TFBS_Central-Mean	0.100961	0.00453004	0.0188171
ESR1_TFBS_Central-Mean	-0.0936105	0.00453004	0.0188171
GATA2_TFBS_Central-Mean	-0.140825	0.00608473	0.021905
ZBTB42_TFBS_Central-Mean	0.0702272	0.00608473	0.021905
SOX2_TFBS_Central-Mean	0.0603042	0.00608473	0.021905
PAX5_TFBS_Central-Mean	0.0761774	0.00608473	0.021905
NR2F2_TFBS_Central-Mean	-0.102709	0.00798788	0.0269591
IRF4_TFBS_Central-Mean	0.0524025	0.00798788	0.0269591
SIX2_TFBS_Central-Mean	0.0740072	0.0104003	0.0320925
TEAD1_TFBS_Central-Mean	-0.0963968	0.0104003	0.0320925
TP73_TFBS_Central-Mean	0.0602466	0.0104003	0.0320925
BCL11B_TFBS_Central-Mean	0.0816901	0.0169944	0.0482998
TEAD3_TFBS_Central-Mean	-0.0766529	0.0169944	0.0482998
HIF3A_TFBS_Central-Mean	-0.0780219	0.0169944	0.0482998
PLAG1_TFBS_Central-Mean	0.048865	0.0213368	0.0590864
BCL11A_TFBS_Central-Mean	0.0423747	0.0266173	0.0684446
ETS1_TFBS_Central-Mean	0.218998	0.0266173	0.0684446
TP63_TFBS_Central-Mean	0.0568344	0.0266173	0.0684446
SCRT2_TFBS_Central-Mean	0.0361047	0.0328093	0.0805319
MYCN_TFBS_Central-Mean	0.155232	0.0328093	0.0805319
SIX5_TFBS_Central-Mean	0.178866	0.0401807	0.0943372
NFKB2_TFBS_Central-Mean	0.0353869	0.0401807	0.0943372
IRF1_TFBS_Central-Mean	0.100012	0.0487315	0.103196
ETV4_TFBS_Central-Mean	-0.0755015	0.0487315	0.103196
HOXC5_TFBS_Central-Mean	-0.0656221	0.0487315	0.103196
CTCFL_TFBS_Central-Mean	0.131934	0.0487315	0.103196
OSR2_TFBS_Central-Mean	0.0638626	0.0487315	0.103196
BACH2_TFBS_Central-Mean	0.0435584	0.0587029	0.117406
STAT5A_TFBS_Central-Mean	0.040167	0.0587029	0.117406
PROX1_TFBS_Central-Mean	-0.0504365	0.0587029	0.117406
BATF_TFBS_Central-Mean	0.0360364	0.070095	0.130522
PBX4_TFBS_Central-Mean	-0.0636995	0.070095	0.130522
ZNF467_TFBS_Central-Mean	0.0297276	0.070095	0.130522
TAL1_TFBS_Central-Mean	0.028388	0.070095	0.130522
FOXO1_TFBS_Central-Mean	0.0360574	0.0832295	0.149813
TFAP2C_TFBS_Central-Mean	-0.0557515	0.0832295	0.149813
POU2F2_TFBS_Central-Mean	0.0369231	0.0980258	0.173554
NEUROD1_TFBS_Central-Mean	0.0242966	0.114806	0.190754
SP5_TFBS_Central-Mean	0.0931567	0.114806	0.190754
SCRT1_TFBS_Central-Mean	0.0320512	0.114806	0.190754
MECOM_TFBS_Central-Mean	0.0335929	0.114806	0.190754
NR2F1_TFBS_Central-Mean	-0.0196524	0.130608	0.213723
IKZF1_TFBS_Central-Mean	0.0505501	0.15445	0.238295
ETV1_TFBS_Central-Mean	0.0945289	0.15445	0.238295
T_TFBS_Central-Mean	0.0209966	0.15445	0.238295
NR2F6_TFBS_Central-Mean	-0.0191309	0.15445	0.238295
KLF11_TFBS_Central-Mean	0.056544	0.177503	0.270004
TBX2_TFBS_Central-Mean	0.0208542	0.203021	0.30036
TBX5_TFBS_Central-Mean	0.0230483	0.203021	0.30036
ZNF486_TFBS_Central-Mean	0.0330109	0.230791	0.332339
PRDM9_TFBS_Central-Mean	0.038902	0.230791	0.332339
CEBPA_TFBS_Central-Mean	0.0348223	0.261134	0.36157
MEIS1_TFBS_Central-Mean	0.0268704	0.261134	0.36157
EHF_TFBS_Central-Mean	-0.0734643	0.261134	0.36157
MEIS2_TFBS_Central-Mean	-0.0185424	0.293836	0.4017
CEBPD_TFBS_Central-Mean	0.0208683	0.329138	0.433499
KLF15_TFBS_Central-Mean	0.0323549	0.329138	0.433499
EBF3_TFBS_Central-Mean	0.0155253	0.329138	0.433499
PAX3_TFBS_Central-Mean	0.0143225	0.366773	0.466017
NKX2-1_TFBS_Central-Mean	0.0737598	0.366773	0.466017
PRDM6_TFBS_Central-Mean	-0.0266769	0.366773	0.466017
MYC_TFBS_Central-Mean	0.074555	0.407007	0.511125
SP4_TFBS_Central-Mean	0.0373208	0.449412	0.557891
SPDEF_TFBS_Central-Mean	-0.0128059	0.541059	0.642135
KLF9_TFBS_Central-Mean	-0.0429689	0.541059	0.642135
RUNX3_TFBS_Central-Mean	0.00344082	0.541059	0.642135
STAT4_TFBS_Central-Mean	0.021809	0.541059	0.642135
HEY1_TFBS_Central-Mean	0.028772	0.590031	0.685198
HOXC9_TFBS_Central-Mean	0.0105327	0.590031	0.685198
EOMES_TFBS_Central-Mean	0.00610988	0.640666	0.713319
GLIS3_TFBS_Central-Mean	0.0110546	0.640666	0.713319
GFI1_TFBS_Central-Mean	-0.00957821	0.640666	0.713319
ETV5_TFBS_Central-Mean	0.000307637	0.640666	0.713319
BATF3_TFBS_Central-Mean	0.0121181	0.693123	0.748573
ZIC2_TFBS_Central-Mean	0.0128932	0.693123	0.748573
RXRA_TFBS_Central-Mean	0.0272395	0.693123	0.748573
ZEB2_TFBS_Central-Mean	-0.00873495	0.746814	0.798573
ZBTB16_TFBS_Central-Mean	0.00451173	0.801871	0.84904
ZFHX2_TFBS_Central-Mean	0.0147547	0.857733	0.89937
KLF1_TFBS_Central-Mean	-0.00461591	0.914425	0.931678
ZEB1_TFBS_Central-Mean	0.018098	0.914425	0.931678
ETV6_TFBS_Central-Mean	-0.00318421	0.914425	0.931678
E2F7_TFBS_Central-Mean	-0.00350572	0.971359	0.971359
ISL1_TFBS_Central-Mean	0.000591759	0.971359	0.971359

## Sheet: Paralogous TFs 108 
Significantly Differential NDR Signature Transcription Factors(n=38)	Paralogous Transcription Factors (n=46)
HNF4G	NR2F1	NR2F6	RXRA	NR2F2
NR2F2	HNF4G	NR2F1	NR2F6	RXRA
AR	ESR1	NR3C1	PGR
ESR1	PGR	NR3C1	AR
NR3C1	AR	ESR1	PGR
PGR	ESR1	NR3C1	AR
FOXA1	FOXA2	FOXO1
FOXA2	FOXA1	FOXO1
GATA3	GATA2	TRPS1
GATA2	GATA3	TRPS1
TRPS1	GATA2	GATA3
SOX5	SOX2
SOX2	SOX5
TEAD1	TEAD3
TEAD3	TEAD1
ZNF217	BCL11B	BCL11A
BCL11B	ZNF217	BCL11A
FLI1	EHF	ETS1	ETV1	ETV4	ETV5	ETV6	SPDEF
ZBTB42	PRDM6	SCRT2	ZBTB16	SCRT1
HOXB13	HOXC9	HOXC5
EBF1	EBF3
E2F8	E2F7
IRF4	IRF1
NEUROG2	NEUROD1
NKX3-1	NKX2-1
PAX5	PAX3
POU3F2	POU2F2
REST	PLAG1
RUNX1	RUNX3
SIX2	SIX5
TP73	TP63
TCF4	NA
HIF3A	NA
ASCL1	NA
HNF1A	NA
RARG	NA
ONECUT2	NA
GRHL2	NA

## Sheet: ATAC-Site_MeansSTDs
	ATAC-AR-TF_ATAC_Central-Mean	ATAC-AR-TF_ATAC_Window-Mean	ATAC-NE-TF_ATAC_Central-Mean	ATAC-NE-TF_ATAC_Window-Mean
Feature	ATAC-AR-TF_ATAC_Central-Mean	ATAC-AR-TF_ATAC_Window-Mean	ATAC-NE-TF_ATAC_Central-Mean	ATAC-NE-TF_ATAC_Window-Mean
ARPC_Mean	0.750246	0.91429	1.01331	0.999084
ARPC_Std	0.0698404	0.0278572	0.0182432	0.00567295
NEPC_Mean	0.957927	0.986265	0.886987	0.9499
NEPC_Std	0.0216934	0.0048675	0.0240565	0.00433933
Healthy_Mean	0.974641	0.994114	1.00158	0.996517
Healthy_Std	0.012221	0.00257059	0.00673122	0.00218177
