# Supplementary material for: Nucleosome Patterns in Circulating Tumor DNA Reveal Transcriptional Regulation of Advanced Prostate Cancer Phenotypes
Source: Oxford University Press journal article supplement (doi:10.1158/2159-8290.cd-22-0692), 2022-11-18
Supplement: cd-22-0692_supp4.xlsx [file cd-22-0692_supp4.xlsx]

## Sheet: 338TFs_CentralMean
	Log2FC	p-value	p-adjusted
ZSCAN9_TFBS-L_Central-Mean	-0.386554	2.6805e-05	0.000823644
ZNF792_TFBS-L_Central-Mean	-0.229344	2.6805e-05	0.000823644
HNF4G_TFBS-L_Central-Mean	-0.297717	2.6805e-05	0.000823644
HOXB13_TFBS-L_Central-Mean	-0.487874	2.6805e-05	0.000823644
ASCL1_TFBS-L_Central-Mean	0.362726	2.6805e-05	0.000823644
IKZF5_TFBS-L_Central-Mean	-0.170215	2.6805e-05	0.000823644
ZFP1_TFBS-L_Central-Mean	-0.143392	2.6805e-05	0.000823644
TFE3_TFBS-L_Central-Mean	-0.171422	2.6805e-05	0.000823644
TCF3_TFBS-L_Central-Mean	0.107367	2.6805e-05	0.000823644
NEUROG2_TFBS-L_Central-Mean	0.101359	2.6805e-05	0.000823644
REST_TFBS-L_Central-Mean	-0.765702	2.6805e-05	0.000823644
GRHL2_TFBS-L_Central-Mean	-0.653271	5.361e-05	0.00120801
MYOG_TFBS-L_Central-Mean	0.0944379	5.361e-05	0.00120801
ERF_TFBS-L_Central-Mean	-0.315571	5.361e-05	0.00120801
AR_TFBS-L_Central-Mean	-0.557238	5.361e-05	0.00120801
FOXA1_TFBS-L_Central-Mean	-0.56987	0.00010722	0.00172573
NR1H3_TFBS-L_Central-Mean	-0.14639	0.00010722	0.00172573
NKX3-1_TFBS-L_Central-Mean	-0.375484	0.00010722	0.00172573
MYOD1_TFBS-L_Central-Mean	0.127327	0.00010722	0.00172573
MYF5_TFBS-L_Central-Mean	0.0880103	0.00010722	0.00172573
ASCL2_TFBS-L_Central-Mean	-0.466833	0.00010722	0.00172573
TCF4_TFBS-L_Central-Mean	0.105218	0.000187635	0.00264252
RUNX1_TFBS-L_Central-Mean	0.0799369	0.000187635	0.00264252
MIXL1_TFBS-L_Central-Mean	-0.189736	0.000187635	0.00264252
RXRB_TFBS-L_Central-Mean	-0.115056	0.00032166	0.00388289
PGR_TFBS-L_Central-Mean	-0.327125	0.00032166	0.00388289
TCF12_TFBS-L_Central-Mean	0.134589	0.00032166	0.00388289
ZNF217_TFBS-L_Central-Mean	-0.265699	0.00032166	0.00388289
ZNF652_TFBS-L_Central-Mean	-0.0557995	0.000509295	0.00593592
FOXA3_TFBS-L_Central-Mean	-0.104596	0.000804149	0.00799419
MYB_TFBS-L_Central-Mean	0.067485	0.000804149	0.00799419
FOXM1_TFBS-L_Central-Mean	-0.1918	0.000804149	0.00799419
NR3C1_TFBS-L_Central-Mean	-0.195138	0.000804149	0.00799419
AHR_TFBS-L_Central-Mean	-0.176905	0.000804149	0.00799419
PBX1_TFBS-L_Central-Mean	0.0757243	0.00117942	0.0110734
FOXA2_TFBS-L_Central-Mean	-0.212808	0.00117942	0.0110734
NR5A2_TFBS-L_Central-Mean	-0.0952531	0.00171552	0.0141426
RARG_TFBS-L_Central-Mean	-0.131803	0.00171552	0.0141426
HIC1_TFBS-L_Central-Mean	0.0447086	0.00171552	0.0141426
GATA3_TFBS-L_Central-Mean	-0.177289	0.00171552	0.0141426
HNF1A_TFBS-L_Central-Mean	-0.16086	0.00171552	0.0141426
TRPS1_TFBS-L_Central-Mean	-0.146276	0.00241245	0.016641
ESRRA_TFBS-L_Central-Mean	-0.103134	0.00241245	0.016641
SP2_TFBS-L_Central-Mean	0.385409	0.00241245	0.016641
NFYA_TFBS-L_Central-Mean	0.155092	0.00241245	0.016641
E2F8_TFBS-L_Central-Mean	-0.112369	0.00241245	0.016641
PBX3_TFBS-L_Central-Mean	0.189049	0.00241245	0.016641
POU3F2_TFBS-L_Central-Mean	0.0603913	0.00241245	0.016641
SOX5_TFBS-L_Central-Mean	-0.0735874	0.00241245	0.016641
ONECUT2_TFBS-L_Central-Mean	-0.0832865	0.00335062	0.0222061
EBF1_TFBS-L_Central-Mean	0.0747155	0.00335062	0.0222061
FLI1_TFBS-L_Central-Mean	0.100961	0.00453004	0.0278392
HNF1B_TFBS-L_Central-Mean	-0.0962119	0.00453004	0.0278392
ARID3A_TFBS-L_Central-Mean	-0.0831794	0.00453004	0.0278392
ESR1_TFBS-L_Central-Mean	-0.0936105	0.00453004	0.0278392
ZBTB42_TFBS-L_Central-Mean	0.0702272	0.00608473	0.032135
SOX13_TFBS-L_Central-Mean	-0.0647287	0.00608473	0.032135
CDX2_TFBS-L_Central-Mean	-0.133546	0.00608473	0.032135
KLF10_TFBS-L_Central-Mean	0.261256	0.00608473	0.032135
SOX2_TFBS-L_Central-Mean	0.0603042	0.00608473	0.032135
PAX5_TFBS-L_Central-Mean	0.0761774	0.00608473	0.032135
GATA2_TFBS-L_Central-Mean	-0.140825	0.00608473	0.032135
SP1_TFBS-L_Central-Mean	0.362688	0.00608473	0.032135
ZNF580_TFBS-L_Central-Mean	-0.125804	0.00608473	0.032135
ZNF449_TFBS-L_Central-Mean	0.055981	0.00798788	0.0397045
ZSCAN22_TFBS-L_Central-Mean	0.0655961	0.00798788	0.0397045
NR2F2_TFBS-L_Central-Mean	-0.102709	0.00798788	0.0397045
IRF4_TFBS-L_Central-Mean	0.0524025	0.00798788	0.0397045
ZBTB6_TFBS-L_Central-Mean	0.0490488	0.0104003	0.0475042
TP53_TFBS-L_Central-Mean	0.0452549	0.0104003	0.0475042
TEAD1_TFBS-L_Central-Mean	-0.0963968	0.0104003	0.0475042
TP73_TFBS-L_Central-Mean	0.0602466	0.0104003	0.0475042
PKNOX1_TFBS-L_Central-Mean	0.101673	0.0104003	0.0475042
SIX2_TFBS-L_Central-Mean	0.0740072	0.0104003	0.0475042
MAZ_TFBS-L_Central-Mean	0.123089	0.0169944	0.0692059
HOMEZ_TFBS-L_Central-Mean	-0.0648081	0.0169944	0.0692059
XBP1_TFBS-L_Central-Mean	0.0815839	0.0169944	0.0692059
HNF4A_TFBS-L_Central-Mean	-0.0772347	0.0169944	0.0692059
HIF3A_TFBS-L_Central-Mean	-0.0780219	0.0169944	0.0692059
BCL11B_TFBS-L_Central-Mean	0.0816901	0.0169944	0.0692059
BCL6_TFBS-L_Central-Mean	0.0506632	0.0169944	0.0692059
TEAD3_TFBS-L_Central-Mean	-0.0766529	0.0169944	0.0692059
ELK3_TFBS-L_Central-Mean	0.0976813	0.0169944	0.0692059
WT1_TFBS-L_Central-Mean	0.0488471	0.0213368	0.0838584
PLAG1_TFBS-L_Central-Mean	0.048865	0.0213368	0.0838584
RBPJ_TFBS-L_Central-Mean	0.144889	0.0213368	0.0838584
HMG20A_TFBS-L_Central-Mean	-0.056252	0.0266173	0.0967383
TP63_TFBS-L_Central-Mean	0.0568344	0.0266173	0.0967383
NFE2_TFBS-L_Central-Mean	0.067127	0.0266173	0.0967383
HAND2_TFBS-L_Central-Mean	0.0394696	0.0266173	0.0967383
NFIB_TFBS-L_Central-Mean	-0.0717369	0.0266173	0.0967383
ETS1_TFBS-L_Central-Mean	0.218998	0.0266173	0.0967383
BCL11A_TFBS-L_Central-Mean	0.0423747	0.0266173	0.0967383
MYCN_TFBS-L_Central-Mean	0.155232	0.0328093	0.114325
SCRT2_TFBS-L_Central-Mean	0.0361047	0.0328093	0.114325
TEAD4_TFBS-L_Central-Mean	-0.100176	0.0328093	0.114325
THAP11_TFBS-L_Central-Mean	0.133687	0.0328093	0.114325
MYNN_TFBS-L_Central-Mean	0.0404088	0.0401807	0.133148
SIX5_TFBS-L_Central-Mean	0.178866	0.0401807	0.133148
NFKB2_TFBS-L_Central-Mean	0.0353869	0.0401807	0.133148
POU2F1_TFBS-L_Central-Mean	-0.0605737	0.0401807	0.133148
MAFK_TFBS-L_Central-Mean	-0.043698	0.0401807	0.133148
NFYC_TFBS-L_Central-Mean	0.183826	0.0487315	0.144484
RFX5_TFBS-L_Central-Mean	0.0495993	0.0487315	0.144484
IRF1_TFBS-L_Central-Mean	0.100012	0.0487315	0.144484
OSR2_TFBS-L_Central-Mean	0.0638626	0.0487315	0.144484
CTCFL_TFBS-L_Central-Mean	0.131934	0.0487315	0.144484
ZNF574_TFBS-L_Central-Mean	0.0573664	0.0487315	0.144484
GABPA_TFBS-L_Central-Mean	0.242959	0.0487315	0.144484
HOXC5_TFBS-L_Central-Mean	-0.0656221	0.0487315	0.144484
ZNF24_TFBS-L_Central-Mean	-0.0621863	0.0487315	0.144484
TWIST1_TFBS-L_Central-Mean	0.0444551	0.0487315	0.144484
ETV4_TFBS-L_Central-Mean	-0.0755015	0.0487315	0.144484
ZBTB7A_TFBS-L_Central-Mean	0.0852488	0.0487315	0.144484
ZNF143_TFBS-L_Central-Mean	0.171509	0.0587029	0.162636
STAT5A_TFBS-L_Central-Mean	0.040167	0.0587029	0.162636
FOXH1_TFBS-L_Central-Mean	0.0526514	0.0587029	0.162636
PROX1_TFBS-L_Central-Mean	-0.0504365	0.0587029	0.162636
BACH2_TFBS-L_Central-Mean	0.0435584	0.0587029	0.162636
IRF2_TFBS-L_Central-Mean	0.121337	0.0587029	0.162636
TCF7L2_TFBS-L_Central-Mean	-0.0533401	0.0587029	0.162636
HES2_TFBS-L_Central-Mean	-0.0525784	0.0587029	0.162636
ZNF554_TFBS-L_Central-Mean	0.0523416	0.070095	0.178136
BATF_TFBS-L_Central-Mean	0.0360364	0.070095	0.178136
STAT1_TFBS-L_Central-Mean	0.062442	0.070095	0.178136
NR1H2_TFBS-L_Central-Mean	-0.0804081	0.070095	0.178136
ATF2_TFBS-L_Central-Mean	0.04742	0.070095	0.178136
CREM_TFBS-L_Central-Mean	0.173361	0.070095	0.178136
LYL1_TFBS-L_Central-Mean	0.0360453	0.070095	0.178136
TAL1_TFBS-L_Central-Mean	0.028388	0.070095	0.178136
ZNF467_TFBS-L_Central-Mean	0.0297276	0.070095	0.178136
ZNF18_TFBS-L_Central-Mean	0.0483256	0.070095	0.178136
PBX4_TFBS-L_Central-Mean	-0.0636995	0.070095	0.178136
ATF3_TFBS-L_Central-Mean	0.0825015	0.0832295	0.20094
ETV2_TFBS-L_Central-Mean	-0.0417136	0.0832295	0.20094
ZFP64_TFBS-L_Central-Mean	-0.0322637	0.0832295	0.20094
PBX2_TFBS-L_Central-Mean	0.0572425	0.0832295	0.20094
TFAP2C_TFBS-L_Central-Mean	-0.0557515	0.0832295	0.20094
LEF1_TFBS-L_Central-Mean	0.0456879	0.0832295	0.20094
FOXO1_TFBS-L_Central-Mean	0.0360574	0.0832295	0.20094
HSF1_TFBS-L_Central-Mean	-0.02869	0.0980258	0.230088
ZBTB11_TFBS-L_Central-Mean	0.0919524	0.0980258	0.230088
ELF3_TFBS-L_Central-Mean	-0.0953806	0.0980258	0.230088
POU2F2_TFBS-L_Central-Mean	0.0369231	0.0980258	0.230088
MECOM_TFBS-L_Central-Mean	0.0335929	0.114806	0.251976
HES1_TFBS-L_Central-Mean	-0.0505852	0.114806	0.251976
SP5_TFBS-L_Central-Mean	0.0931567	0.114806	0.251976
E2F1_TFBS-L_Central-Mean	0.224203	0.114806	0.251976
BPTF_TFBS-L_Central-Mean	-0.0257921	0.114806	0.251976
NEUROD1_TFBS-L_Central-Mean	0.0242966	0.114806	0.251976
SNAI2_TFBS-L_Central-Mean	0.064282	0.114806	0.251976
CREB1_TFBS-L_Central-Mean	0.209013	0.114806	0.251976
YY1_TFBS-L_Central-Mean	0.13868	0.114806	0.251976
SCRT1_TFBS-L_Central-Mean	0.0320512	0.114806	0.251976
NR2F1_TFBS-L_Central-Mean	-0.0196524	0.130608	0.284811
PPARG_TFBS-L_Central-Mean	-0.0353474	0.133516	0.285622
KLF4_TFBS-L_Central-Mean	-0.0735434	0.133516	0.285622
MAFG_TFBS-L_Central-Mean	-0.0374349	0.133516	0.285622
ETV1_TFBS-L_Central-Mean	0.0945289	0.15445	0.3126
IKZF1_TFBS-L_Central-Mean	0.0505501	0.15445	0.3126
SOX9_TFBS-L_Central-Mean	-0.0284148	0.15445	0.3126
USF1_TFBS-L_Central-Mean	0.068904	0.15445	0.3126
TFAP2A_TFBS-L_Central-Mean	-0.0373365	0.15445	0.3126
NR2F6_TFBS-L_Central-Mean	-0.0191309	0.15445	0.3126
PRDM1_TFBS-L_Central-Mean	0.0258269	0.15445	0.3126
ZNF341_TFBS-L_Central-Mean	0.0518042	0.15445	0.3126
T_TFBS-L_Central-Mean	0.0209966	0.15445	0.3126
CTCF_TFBS-L_Central-Mean	0.125737	0.177503	0.342834
KLF11_TFBS-L_Central-Mean	0.056544	0.177503	0.342834
SPI1_TFBS-L_Central-Mean	0.0360311	0.177503	0.342834
MEF2B_TFBS-L_Central-Mean	0.0338102	0.177503	0.342834
ZFX_TFBS-L_Central-Mean	0.0849419	0.177503	0.342834
EGR1_TFBS-L_Central-Mean	0.0619808	0.177503	0.342834
SPIB_TFBS-L_Central-Mean	0.021053	0.177503	0.342834
ZNF274_TFBS-L_Central-Mean	-0.0177883	0.177503	0.342834
ERG_TFBS-L_Central-Mean	0.0969491	0.203021	0.383358
TBX2_TFBS-L_Central-Mean	0.0208542	0.203021	0.383358
USF2_TFBS-L_Central-Mean	0.0568055	0.203021	0.383358
TBX5_TFBS-L_Central-Mean	0.0230483	0.203021	0.383358
DUX4_TFBS-L_Central-Mean	-0.0258774	0.230791	0.408415
PITX3_TFBS-L_Central-Mean	0.0222836	0.230791	0.408415
ZNF486_TFBS-L_Central-Mean	0.0330109	0.230791	0.408415
PRDM9_TFBS-L_Central-Mean	0.038902	0.230791	0.408415
SOX4_TFBS-L_Central-Mean	0.040718	0.230791	0.408415
REL_TFBS-L_Central-Mean	0.0321868	0.230791	0.408415
NFATC3_TFBS-L_Central-Mean	0.0113241	0.230791	0.408415
FOSL1_TFBS-L_Central-Mean	0.0204998	0.230791	0.408415
SRF_TFBS-L_Central-Mean	0.0381265	0.230791	0.408415
MBD2_TFBS-L_Central-Mean	0.0708205	0.230791	0.408415
MYBL2_TFBS-L_Central-Mean	-0.0348032	0.230791	0.408415
STAT5B_TFBS-L_Central-Mean	0.0395312	0.230791	0.408415
ZNF263_TFBS-L_Central-Mean	0.0239058	0.238052	0.419071
ZNF317_TFBS-L_Central-Mean	0.0208587	0.261134	0.430553
BHLHE40_TFBS-L_Central-Mean	0.0369437	0.261134	0.430553
ATF4_TFBS-L_Central-Mean	0.027695	0.261134	0.430553
ELF1_TFBS-L_Central-Mean	0.113623	0.261134	0.430553
NRF1_TFBS-L_Central-Mean	0.157886	0.261134	0.430553
EHF_TFBS-L_Central-Mean	-0.0734643	0.261134	0.430553
RBAK_TFBS-L_Central-Mean	0.0273369	0.261134	0.430553
MEIS1_TFBS-L_Central-Mean	0.0268704	0.261134	0.430553
TCF7_TFBS-L_Central-Mean	-0.030953	0.261134	0.430553
MITF_TFBS-L_Central-Mean	0.0321262	0.261134	0.430553
TBX21_TFBS-L_Central-Mean	0.0160766	0.261134	0.430553
VDR_TFBS-L_Central-Mean	0.0215344	0.261134	0.430553
CEBPA_TFBS-L_Central-Mean	0.0348223	0.261134	0.430553
E2F4_TFBS-L_Central-Mean	0.0969037	0.293836	0.479791
MEIS2_TFBS-L_Central-Mean	-0.0185424	0.293836	0.479791
EBF3_TFBS-L_Central-Mean	0.0155253	0.329138	0.527245
ZNF382_TFBS-L_Central-Mean	0.0172067	0.329138	0.527245
CEBPD_TFBS-L_Central-Mean	0.0208683	0.329138	0.527245
KLF15_TFBS-L_Central-Mean	0.0323549	0.329138	0.527245
PRDM6_TFBS-L_Central-Mean	-0.0266769	0.366773	0.568666
ZNF770_TFBS-L_Central-Mean	0.0132443	0.366773	0.568666
PAX3_TFBS-L_Central-Mean	0.0143225	0.366773	0.568666
ATF1_TFBS-L_Central-Mean	0.0678184	0.366773	0.568666
STAT6_TFBS-L_Central-Mean	0.0216754	0.366773	0.568666
ATF7_TFBS-L_Central-Mean	0.0174769	0.366773	0.568666
NKX2-1_TFBS-L_Central-Mean	0.0737598	0.366773	0.568666
CLOCK_TFBS-L_Central-Mean	0.0426139	0.407007	0.606028
MEF2C_TFBS-L_Central-Mean	0.0162401	0.407007	0.606028
MAX_TFBS-L_Central-Mean	0.0675631	0.407007	0.606028
MYC_TFBS-L_Central-Mean	0.074555	0.407007	0.606028
ZBTB26_TFBS-L_Central-Mean	-0.0337412	0.407007	0.606028
ZBTB33_TFBS-L_Central-Mean	0.0551443	0.407007	0.606028
FOXK2_TFBS-L_Central-Mean	-0.042915	0.407007	0.606028
ZNF264_TFBS-L_Central-Mean	0.0139458	0.407007	0.606028
E2F6_TFBS-L_Central-Mean	0.0452848	0.407007	0.606028
KLF16_TFBS-L_Central-Mean	0.0290817	0.449412	0.649151
MECP2_TFBS-L_Central-Mean	0.0238425	0.449412	0.649151
SP4_TFBS-L_Central-Mean	0.0373208	0.449412	0.649151
TCF7L1_TFBS-L_Central-Mean	-0.0351532	0.449412	0.649151
ZBTB14_TFBS-L_Central-Mean	0.0896733	0.449412	0.649151
POU5F1_TFBS-L_Central-Mean	0.0131415	0.449412	0.649151
SETDB1_TFBS-L_Central-Mean	-0.0205922	0.449412	0.649151
NR2C2_TFBS-L_Central-Mean	0.0380302	0.49423	0.676315
KMT2A_TFBS-L_Central-Mean	0.042494	0.49423	0.676315
MAF_TFBS-L_Central-Mean	0.0252387	0.49423	0.676315
SMAD4_TFBS-L_Central-Mean	-0.0108708	0.49423	0.676315
GATA4_TFBS-L_Central-Mean	-0.0133198	0.49423	0.676315
KLF6_TFBS-L_Central-Mean	-0.0252019	0.49423	0.676315
RELA_TFBS-L_Central-Mean	0.0168494	0.49423	0.676315
CEBPG_TFBS-L_Central-Mean	0.0118948	0.49423	0.676315
NFKB1_TFBS-L_Central-Mean	0.0210587	0.49423	0.676315
ZKSCAN1_TFBS-L_Central-Mean	-0.0284408	0.49423	0.676315
ZNF384_TFBS-L_Central-Mean	-0.0529554	0.49423	0.676315
ZNF146_TFBS-L_Central-Mean	-0.0548388	0.49423	0.676315
FOSB_TFBS-L_Central-Mean	0.0112707	0.49423	0.676315
RUNX3_TFBS-L_Central-Mean	0.00344082	0.541059	0.717168
RFX1_TFBS-L_Central-Mean	0.00150952	0.541059	0.717168
SPDEF_TFBS-L_Central-Mean	-0.0128059	0.541059	0.717168
KLF9_TFBS-L_Central-Mean	-0.0429689	0.541059	0.717168
MNT_TFBS-L_Central-Mean	-0.0205439	0.541059	0.717168
STAT4_TFBS-L_Central-Mean	0.021809	0.541059	0.717168
CEBPB_TFBS-L_Central-Mean	0.020141	0.541059	0.717168
ZNF22_TFBS-L_Central-Mean	0.0737968	0.541059	0.717168
FOXK1_TFBS-L_Central-Mean	-0.0397597	0.590031	0.761185
HOXC9_TFBS-L_Central-Mean	0.0105327	0.590031	0.761185
GLIS1_TFBS-L_Central-Mean	0.00933869	0.590031	0.761185
FOXP1_TFBS-L_Central-Mean	0.0233489	0.590031	0.761185
TFAP4_TFBS-L_Central-Mean	-0.0308542	0.590031	0.761185
HEY1_TFBS-L_Central-Mean	0.028772	0.590031	0.761185
SMAD5_TFBS-L_Central-Mean	0.0510683	0.590031	0.761185
ZNF35_TFBS-L_Central-Mean	0.0157691	0.640666	0.79031
HIF1A_TFBS-L_Central-Mean	0.0230842	0.640666	0.79031
VEZF1_TFBS-L_Central-Mean	-0.0100693	0.640666	0.79031
NANOG_TFBS-L_Central-Mean	-0.00685922	0.640666	0.79031
NFIL3_TFBS-L_Central-Mean	0.0179518	0.640666	0.79031
GFI1_TFBS-L_Central-Mean	-0.00957821	0.640666	0.79031
FOXO3_TFBS-L_Central-Mean	0.00311605	0.640666	0.79031
EOMES_TFBS-L_Central-Mean	0.00610988	0.640666	0.79031
NR4A1_TFBS-L_Central-Mean	0.00451071	0.640666	0.79031
DDIT3_TFBS-L_Central-Mean	-0.0117645	0.640666	0.79031
ETV5_TFBS-L_Central-Mean	0.000307637	0.640666	0.79031
GLIS3_TFBS-L_Central-Mean	0.0110546	0.640666	0.79031
MSC_TFBS-L_Central-Mean	0.050063	0.693123	0.813457
RXRA_TFBS-L_Central-Mean	0.0272395	0.693123	0.813457
BATF3_TFBS-L_Central-Mean	0.0121181	0.693123	0.813457
ZBTB2_TFBS-L_Central-Mean	-0.0137339	0.693123	0.813457
NFE2L2_TFBS-L_Central-Mean	0.00962942	0.693123	0.813457
NFIA_TFBS-L_Central-Mean	0.0212905	0.693123	0.813457
ZIC2_TFBS-L_Central-Mean	0.0128932	0.693123	0.813457
ZIM3_TFBS-L_Central-Mean	-0.0100538	0.693123	0.813457
FOS_TFBS-L_Central-Mean	0.0154369	0.693123	0.813457
ZSCAN16_TFBS-L_Central-Mean	-0.014084	0.693123	0.813457
HMGA1_TFBS-L_Central-Mean	-0.219211	0.693123	0.813457
TBP_TFBS-L_Central-Mean	0.0459651	0.693123	0.813457
IKZF2_TFBS-L_Central-Mean	0.00290826	0.693123	0.813457
EGR2_TFBS-L_Central-Mean	0.021508	0.693123	0.813457
STAT3_TFBS-L_Central-Mean	-0.00793896	0.746814	0.838615
ZNF280A_TFBS-L_Central-Mean	-0.0210242	0.746814	0.838615
PDX1_TFBS-L_Central-Mean	0.00285989	0.746814	0.838615
KDM2B_TFBS-L_Central-Mean	0.0195446	0.746814	0.838615
CXXC1_TFBS-L_Central-Mean	0.0214048	0.746814	0.838615
ZEB2_TFBS-L_Central-Mean	-0.00873495	0.746814	0.838615
EPAS1_TFBS-L_Central-Mean	0.00388551	0.746814	0.838615
JUN_TFBS-L_Central-Mean	0.0151385	0.746814	0.838615
JUNB_TFBS-L_Central-Mean	-0.0271007	0.746814	0.838615
RELB_TFBS-L_Central-Mean	-0.00940579	0.746814	0.838615
ZNF335_TFBS-L_Central-Mean	-0.0190579	0.746814	0.838615
ZBTB17_TFBS-L_Central-Mean	0.0144304	0.746814	0.838615
GATA6_TFBS-L_Central-Mean	-0.012463	0.746814	0.838615
ZBTB16_TFBS-L_Central-Mean	0.00451173	0.801871	0.882842
SOX17_TFBS-L_Central-Mean	0.00844534	0.801871	0.882842
MXI1_TFBS-L_Central-Mean	-0.00602637	0.801871	0.882842
FOSL2_TFBS-L_Central-Mean	-0.0264468	0.801871	0.882842
HLF_TFBS-L_Central-Mean	0.00281897	0.801871	0.882842
FEZF1_TFBS-L_Central-Mean	0.0128484	0.801871	0.882842
ZFHX2_TFBS-L_Central-Mean	0.0147547	0.857733	0.926242
HOXA9_TFBS-L_Central-Mean	-0.0135662	0.857733	0.926242
MAFF_TFBS-L_Central-Mean	-0.0123404	0.857733	0.926242
HMBOX1_TFBS-L_Central-Mean	-0.0178295	0.857733	0.926242
JUND_TFBS-L_Central-Mean	-0.0228822	0.857733	0.926242
OVOL2_TFBS-L_Central-Mean	-0.00188383	0.857733	0.926242
ZNF316_TFBS-L_Central-Mean	-0.00889684	0.914425	0.956891
ETV6_TFBS-L_Central-Mean	-0.00318421	0.914425	0.956891
KLF5_TFBS-L_Central-Mean	0.0334899	0.914425	0.956891
ZEB1_TFBS-L_Central-Mean	0.018098	0.914425	0.956891
SMAD1_TFBS-L_Central-Mean	0.00544767	0.914425	0.956891
KLF1_TFBS-L_Central-Mean	-0.00461591	0.914425	0.956891
ZBTB48_TFBS-L_Central-Mean	0.00205119	0.914425	0.956891
GATA1_TFBS-L_Central-Mean	0.0102604	0.914425	0.956891
ARNTL_TFBS-L_Central-Mean	0.000213891	0.914425	0.956891
PPARD_TFBS-L_Central-Mean	0.00532074	0.914425	0.956891
RUNX2_TFBS-L_Central-Mean	-0.000888744	0.971359	0.977141
PHOX2B_TFBS-L_Central-Mean	0.037223	0.971359	0.977141
ARNT_TFBS-L_Central-Mean	0.00767539	0.971359	0.977141
E2F7_TFBS-L_Central-Mean	-0.00350572	0.971359	0.977141
RARA_TFBS-L_Central-Mean	-3.2823e-05	0.971359	0.977141
ISL1_TFBS-L_Central-Mean	0.000591759	0.971359	0.977141
OTX2_TFBS-L_Central-Mean	0.00542473	0.971359	0.977141
SREBF2_TFBS-L_Central-Mean	-0.010603	0.971359	0.977141
MEF2A_TFBS-L_Central-Mean	0.00983221	0.971359	0.977141
ESR2_TFBS-L_Central-Mean	0.00402488	0.971359	0.977141
NFATC1_TFBS-L_Central-Mean	0.00328063	0.971359	0.977141
SMAD3_TFBS-L_Central-Mean	0.0011112	0.971359	0.977141
EGR3_TFBS-L_Central-Mean	0.000780707	0.971359	0.977141
ZNF121_TFBS-L_Central-Mean	0.0045943	1	1
NFIC_TFBS-L_Central-Mean	-0.0014077	1	1

## Sheet: AR10_AUCs
Region_Feature	AUC
H3K27AC_peak-based-period	0.883194
TSS_Central-Mean	0.876111
GB_amplitude-ratio	0.859861
H3K27AC_amplitude-ratio	0.824167
TSS_amplitude-ratio	0.795972
GB_peak-based-period	0.778889
H3K27ME3_frag-cv	0.761111
H3K27ME3_amplitude-ratio	0.723056
H3K4ME_amplitude-ratio	0.708889
H3K27ME3_peak-based-period	0.7075
TSS_short-long-ratio	0.700694
TSS_Window-Mean	0.688194
TSS_peak-based-period	0.657778
H3K4ME_peak-based-period	0.632222
H3K4ME_short-long-ratio	0.630833
H3K27AC_short-long-ratio	0.601111
TSS_frag-cv	0.552361
GB_short-long-ratio	0.529861
H3K27AC_frag-cv	0.507639
H3K27ME3_frag-mean	0.506806
TSS_Jump-Amplitude	0.492917
TSS_frag-mean	0.491528
H3K4ME_frag-mean	0.446111
GB_frag-cv	0.442778
H3K4ME_frag-cv	0.428056
GB_frag-mean	0.394444
H3K27ME3_short-long-ratio	0.380694
H3K27AC_frag-mean	0.257778

## Sheet: Pheno47_AUCs
Region_Feature	AUC
GB_amplitude-ratio	0.983056
TSS_peak-based-period	0.935833
H3K27AC_peak-based-period	0.9225
H3K27ME3_amplitude-ratio	0.885694
H3K4ME_peak-based-period	0.872222
H3K27AC_short-long-ratio	0.841528
TSS_Jump-Amplitude	0.822778
GB_peak-based-period	0.797222
TSS_Central-Mean	0.787778
GB_frag-cv	0.775
H3K27ME3_short-long-ratio	0.742778
TSS_short-long-ratio	0.733194
H3K27AC_frag-cv	0.732361
H3K4ME_frag-cv	0.730833
H3K27AC_amplitude-ratio	0.724444
TSS_amplitude-ratio	0.710972
H3K27ME3_frag-cv	0.710694
TSS_Window-Mean	0.699167
TSS_frag-cv	0.695833
GB_short-long-ratio	0.6675
H3K4ME_short-long-ratio	0.650694
H3K4ME_amplitude-ratio	0.630417
H3K27ME3_peak-based-period	0.620139
H3K27AC_frag-mean	0.555694
GB_frag-mean	0.535556
H3K4ME_frag-mean	0.509583
H3K27ME3_frag-mean	0.489306
TSS_frag-mean	0.354583

## Sheet: Global_AUCs
Region_Feature	AUC
ATAC_Central-Mean	1
ATAC_Window-Mean	1
H3K4ME1_frag-mean	1
H3K4ME1_short-long-ratio	1
TSS_frag-mean	1
GB_short-long-ratio	0.998333
TSS_short-long-ratio	0.991389
TFBS-L_Window-Mean	0.987778
TFBS-L_Central-Mean	0.976528
TSS_frag-cv	0.949167
TSS_Central-Mean	0.946806
GB_frag-mean	0.929583
H3K4ME1_amplitude-ratio	0.914722
GB_peak-based-period	0.910139
H3K4ME_frag-cv	0.91
H3K27AC_amplitude-ratio	0.904028
H3K27AC_peak-based-period	0.8325
H3K27ME3_peak-based-period	0.798611
H3K4ME1_peak-based-period	0.794167
H3K27ME3_amplitude-ratio	0.784306
TSS_amplitude-ratio	0.77
TSS_peak-based-period	0.765
TSS_Window-Mean	0.745833
GB_amplitude-ratio	0.661944
H3K27AC_short-long-ratio	0.645556
H3K27AC_frag-mean	0.639028
H3K27ME3_frag-cv	0.619028
GB_frag-cv	0.599861
TSS_Jump-Amplitude	0.560556
H3K27AC_frag-cv	0.532222
H3K27ME3_frag-mean	0.509444
H3K27ME3_short-long-ratio	0.292639

## Sheet: Benchmarking_Predictions
	Depth	TFX	NEPC_score	Subtype
136CR_NPH004_0.2X_LowTF_TF0.01	0.2	0.01	1	ARPC
136CR_NPH004_1X_LowTF_TF0.01	1	0.01	1	ARPC
136CR_NPH004_25X_LowTF_TF0.01	25	0.01	0.4937	ARPC
35_NPH004_0.2X_LowTF_TF0.01	0.2	0.01	0	ARPC
35_NPH004_1X_LowTF_TF0.01	1	0.01	0	ARPC
35_NPH004_25X_LowTF_TF0.01	25	0.01	0.1201	ARPC
35CR_NPH004_0.2X_LowTF_TF0.01	0.2	0.01	0.4757	ARPC
35CR_NPH004_1X_LowTF_TF0.01	1	0.01	1	ARPC
35CR_NPH004_25X_LowTF_TF0.01	25	0.01	0.2308	ARPC
58_NPH004_0.2X_LowTF_TF0.01	0.2	0.01	0	ARPC
58_NPH004_1X_LowTF_TF0.01	1	0.01	1	ARPC
58_NPH004_25X_LowTF_TF0.01	25	0.01	0.146	ARPC
92_NPH004_0.2X_LowTF_TF0.01	0.2	0.01	0.3431	ARPC
92_NPH004_1X_LowTF_TF0.01	1	0.01	1	ARPC
92_NPH004_25X_LowTF_TF0.01	25	0.01	0.1435	ARPC
145-2_NPH004_0.2X_LowTF_TF0.01	0.2	0.01	1	NEPC
145-2_NPH004_1X_LowTF_TF0.01	1	0.01	1	NEPC
145-2_NPH004_25X_LowTF_TF0.01	25	0.01	1	NEPC
173-1_NPH004_0.2X_LowTF_TF0.01	0.2	0.01	0	NEPC
173-1_NPH004_1X_LowTF_TF0.01	1	0.01	1	NEPC
173-1_NPH004_25X_LowTF_TF0.01	25	0.01	1	NEPC
208-4_NPH004_0.2X_LowTF_TF0.01	0.2	0.01	0.3855	NEPC
208-4_NPH004_1X_LowTF_TF0.01	1	0.01	1	NEPC
208-4_NPH004_25X_LowTF_TF0.01	25	0.01	1	NEPC
49_NPH004_0.2X_LowTF_TF0.01	0.2	0.01	1	NEPC
49_NPH004_1X_LowTF_TF0.01	1	0.01	0.5602	NEPC
49_NPH004_25X_LowTF_TF0.01	25	0.01	1	NEPC
93_NPH004_0.2X_LowTF_TF0.01	0.2	0.01	0	NEPC
93_NPH004_1X_LowTF_TF0.01	1	0.01	1	NEPC
93_NPH004_25X_LowTF_TF0.01	25	0.01	1	NEPC
136CR_NPH004_0.2X_LowTF_TF0.05	0.2	0.05	1	ARPC
136CR_NPH004_1X_LowTF_TF0.05	1	0.05	0	ARPC
136CR_NPH004_25X_LowTF_TF0.05	25	0.05	0.6496	ARPC
35_NPH004_0.2X_LowTF_TF0.05	0.2	0.05	0.2298	ARPC
35_NPH004_1X_LowTF_TF0.05	1	0.05	0.8537	ARPC
35_NPH004_25X_LowTF_TF0.05	25	0.05	0.1938	ARPC
35CR_NPH004_0.2X_LowTF_TF0.05	0.2	0.05	0.6805	ARPC
35CR_NPH004_1X_LowTF_TF0.05	1	0.05	0	ARPC
35CR_NPH004_25X_LowTF_TF0.05	25	0.05	0.2089	ARPC
58_NPH004_0.2X_LowTF_TF0.05	0.2	0.05	0	ARPC
58_NPH004_1X_LowTF_TF0.05	1	0.05	0.4729	ARPC
58_NPH004_25X_LowTF_TF0.05	25	0.05	0.1834	ARPC
92_NPH004_0.2X_LowTF_TF0.05	0.2	0.05	1	ARPC
92_NPH004_1X_LowTF_TF0.05	1	0.05	1	ARPC
92_NPH004_25X_LowTF_TF0.05	25	0.05	0.1628	ARPC
145-2_NPH004_0.2X_LowTF_TF0.05	0.2	0.05	0.7106	NEPC
145-2_NPH004_1X_LowTF_TF0.05	1	0.05	1	NEPC
145-2_NPH004_25X_LowTF_TF0.05	25	0.05	1	NEPC
173-1_NPH004_0.2X_LowTF_TF0.05	0.2	0.05	0.8517	NEPC
173-1_NPH004_1X_LowTF_TF0.05	1	0.05	1	NEPC
173-1_NPH004_25X_LowTF_TF0.05	25	0.05	1	NEPC
208-4_NPH004_0.2X_LowTF_TF0.05	0.2	0.05	0	NEPC
208-4_NPH004_1X_LowTF_TF0.05	1	0.05	0.6305	NEPC
208-4_NPH004_25X_LowTF_TF0.05	25	0.05	1	NEPC
49_NPH004_0.2X_LowTF_TF0.05	0.2	0.05	0	NEPC
49_NPH004_1X_LowTF_TF0.05	1	0.05	0.6802	NEPC
49_NPH004_25X_LowTF_TF0.05	25	0.05	1	NEPC
93_NPH004_0.2X_LowTF_TF0.05	0.2	0.05	0.4719	NEPC
93_NPH004_1X_LowTF_TF0.05	1	0.05	1	NEPC
93_NPH004_25X_LowTF_TF0.05	25	0.05	1	NEPC
136CR_NPH004_0.2X_HighTF_TF0.10	0.2	0.1	0.2027	ARPC
136CR_NPH004_1X_HighTF_TF0.10	1	0.1	0.5105	ARPC
136CR_NPH004_25X_HighTF_TF0.10	25	0.1	0	ARPC
35_NPH004_0.2X_HighTF_TF0.10	0.2	0.1	0.1553	ARPC
35_NPH004_1X_HighTF_TF0.10	1	0.1	0.3291	ARPC
35_NPH004_25X_HighTF_TF0.10	25	0.1	0	ARPC
35CR_NPH004_0.2X_HighTF_TF0.10	0.2	0.1	0	ARPC
35CR_NPH004_1X_HighTF_TF0.10	1	0.1	0.5	ARPC
35CR_NPH004_25X_HighTF_TF0.10	25	0.1	0.0104	ARPC
58_NPH004_0.2X_HighTF_TF0.10	0.2	0.1	0.7656	ARPC
58_NPH004_1X_HighTF_TF0.10	1	0.1	0.3564	ARPC
58_NPH004_25X_HighTF_TF0.10	25	0.1	0	ARPC
92_NPH004_0.2X_HighTF_TF0.10	0.2	0.1	0	ARPC
92_NPH004_1X_HighTF_TF0.10	1	0.1	0.2666	ARPC
92_NPH004_25X_HighTF_TF0.10	25	0.1	0	ARPC
145-2_NPH004_0.2X_HighTF_TF0.10	0.2	0.1	0.6434	NEPC
145-2_NPH004_1X_HighTF_TF0.10	1	0.1	0.9895	NEPC
145-2_NPH004_25X_HighTF_TF0.10	25	0.1	1	NEPC
173-1_NPH004_0.2X_HighTF_TF0.10	0.2	0.1	0.7252	NEPC
173-1_NPH004_1X_HighTF_TF0.10	1	0.1	1	NEPC
173-1_NPH004_25X_HighTF_TF0.10	25	0.1	1	NEPC
208-4_NPH004_0.2X_HighTF_TF0.10	0.2	0.1	0.6672	NEPC
208-4_NPH004_1X_HighTF_TF0.10	1	0.1	1	NEPC
208-4_NPH004_25X_HighTF_TF0.10	25	0.1	1	NEPC
49_NPH004_0.2X_HighTF_TF0.10	0.2	0.1	0	NEPC
49_NPH004_1X_HighTF_TF0.10	1	0.1	0.509	NEPC
49_NPH004_25X_HighTF_TF0.10	25	0.1	1	NEPC
93_NPH004_0.2X_HighTF_TF0.10	0.2	0.1	0.564	NEPC
93_NPH004_1X_HighTF_TF0.10	1	0.1	1	NEPC
93_NPH004_25X_HighTF_TF0.10	25	0.1	1	NEPC
136CR_NPH004_0.2X_HighTF_TF0.20	0.2	0.2	0	ARPC
136CR_NPH004_1X_HighTF_TF0.20	1	0.2	0	ARPC
136CR_NPH004_25X_HighTF_TF0.20	25	0.2	0	ARPC
35_NPH004_0.2X_HighTF_TF0.20	0.2	0.2	0	ARPC
35_NPH004_1X_HighTF_TF0.20	1	0.2	0	ARPC
35_NPH004_25X_HighTF_TF0.20	25	0.2	0	ARPC
35CR_NPH004_0.2X_HighTF_TF0.20	0.2	0.2	0.7017	ARPC
35CR_NPH004_1X_HighTF_TF0.20	1	0.2	0.007	ARPC
35CR_NPH004_25X_HighTF_TF0.20	25	0.2	0	ARPC
58_NPH004_0.2X_HighTF_TF0.20	0.2	0.2	0.2932	ARPC
58_NPH004_1X_HighTF_TF0.20	1	0.2	0	ARPC
58_NPH004_25X_HighTF_TF0.20	25	0.2	0	ARPC
92_NPH004_0.2X_HighTF_TF0.20	0.2	0.2	0.3928	ARPC
92_NPH004_1X_HighTF_TF0.20	1	0.2	0.2339	ARPC
92_NPH004_25X_HighTF_TF0.20	25	0.2	0	ARPC
145-2_NPH004_0.2X_HighTF_TF0.20	0.2	0.2	1	NEPC
145-2_NPH004_1X_HighTF_TF0.20	1	0.2	1	NEPC
145-2_NPH004_25X_HighTF_TF0.20	25	0.2	1	NEPC
173-1_NPH004_0.2X_HighTF_TF0.20	0.2	0.2	1	NEPC
173-1_NPH004_1X_HighTF_TF0.20	1	0.2	1	NEPC
173-1_NPH004_25X_HighTF_TF0.20	25	0.2	1	NEPC
208-4_NPH004_0.2X_HighTF_TF0.20	0.2	0.2	0.7456	NEPC
208-4_NPH004_1X_HighTF_TF0.20	1	0.2	1	NEPC
208-4_NPH004_25X_HighTF_TF0.20	25	0.2	1	NEPC
49_NPH004_0.2X_HighTF_TF0.20	0.2	0.2	0.7192	NEPC
49_NPH004_1X_HighTF_TF0.20	1	0.2	1	NEPC
49_NPH004_25X_HighTF_TF0.20	25	0.2	1	NEPC
93_NPH004_0.2X_HighTF_TF0.20	0.2	0.2	0.0876	NEPC
93_NPH004_1X_HighTF_TF0.20	1	0.2	1	NEPC
93_NPH004_25X_HighTF_TF0.20	25	0.2	1	NEPC
136CR_NPH004_0.2X_HighTF_TF0.30	0.2	0.3	0.492	ARPC
136CR_NPH004_1X_HighTF_TF0.30	1	0.3	0	ARPC
136CR_NPH004_25X_HighTF_TF0.30	25	0.3	0	ARPC
35_NPH004_0.2X_HighTF_TF0.30	0.2	0.3	0.4888	ARPC
35_NPH004_1X_HighTF_TF0.30	1	0.3	0	ARPC
35_NPH004_25X_HighTF_TF0.30	25	0.3	0	ARPC
35CR_NPH004_0.2X_HighTF_TF0.30	0.2	0.3	0	ARPC
35CR_NPH004_1X_HighTF_TF0.30	1	0.3	0	ARPC
35CR_NPH004_25X_HighTF_TF0.30	25	0.3	0	ARPC
58_NPH004_0.2X_HighTF_TF0.30	0.2	0.3	0	ARPC
58_NPH004_1X_HighTF_TF0.30	1	0.3	0	ARPC
58_NPH004_25X_HighTF_TF0.30	25	0.3	0	ARPC
92_NPH004_0.2X_HighTF_TF0.30	0.2	0.3	0	ARPC
92_NPH004_1X_HighTF_TF0.30	1	0.3	0	ARPC
92_NPH004_25X_HighTF_TF0.30	25	0.3	0	ARPC
145-2_NPH004_0.2X_HighTF_TF0.30	0.2	0.3	0.8282	NEPC
145-2_NPH004_1X_HighTF_TF0.30	1	0.3	1	NEPC
145-2_NPH004_25X_HighTF_TF0.30	25	0.3	1	NEPC
173-1_NPH004_0.2X_HighTF_TF0.30	0.2	0.3	0.6276	NEPC
173-1_NPH004_1X_HighTF_TF0.30	1	0.3	1	NEPC
173-1_NPH004_25X_HighTF_TF0.30	25	0.3	1	NEPC
208-4_NPH004_0.2X_HighTF_TF0.30	0.2	0.3	0.7335	NEPC
208-4_NPH004_1X_HighTF_TF0.30	1	0.3	1	NEPC
208-4_NPH004_25X_HighTF_TF0.30	25	0.3	1	NEPC
49_NPH004_0.2X_HighTF_TF0.30	0.2	0.3	0.5318	NEPC
49_NPH004_1X_HighTF_TF0.30	1	0.3	1	NEPC
49_NPH004_25X_HighTF_TF0.30	25	0.3	1	NEPC
93_NPH004_0.2X_HighTF_TF0.30	0.2	0.3	1	NEPC
93_NPH004_1X_HighTF_TF0.30	1	0.3	1	NEPC
93_NPH004_25X_HighTF_TF0.30	25	0.3	1	NEPC

## Sheet: Benchmarking_AUCs
TFX	Depth	AUC
0.01	0.2X	0.56
0.05	0.2X	0.36
0.1	0.2X	0.68
0.2	0.2X	0.88
0.3	0.2X	1
0.01	1X	0.52
0.05	1X	0.78
0.1	1X	0.96
0.2	1X	1
0.3	1X	1
0.01	25X	1
0.05	25X	1
0.1	25X	1
0.2	25X	1
0.3	25X	1

## Sheet: Triplet-Mixture_Predictions
Sample	NEPC-ARPC_ratio	TFX	ARPC_fraction_estimate	NEPC_fraction_estimate
145-2_LuCaP_92_LuCaP_NEPC_0.30_TF0.03	0.3	0.03	0.00639815	0.0236018
93_LuCaP_35CR_LuCaP_NEPC_0.10_TF0.30	0.1	0.3	0.15498	0.14502
49_LuCaP_35CR_LuCaP_NEPC_0.10_TF0.20	0.1	0.2	0.11857	0.08143
145-2_LuCaP_35CR_LuCaP_NEPC_0.90_TF0.01	0.9	0.01	0.00209231	0.00790769
208-4_LuCaP_58_LuCaP_NEPC_0.50_TF0.03	0.5	0.03	0.00349509	0.0265049
93_LuCaP_58_LuCaP_NEPC_0.30_TF0.30	0.3	0.3	0.032998	0.267002
145-2_LuCaP_136CR_LuCaP_NEPC_0.10_TF0.30	0.1	0.3	0.186475	0.113525
208-4_LuCaP_136CR_LuCaP_NEPC_0.10_TF0.10	0.1	0.1	0.0430846	0.0569154
93_LuCaP_92_LuCaP_NEPC_0.10_TF0.05	0.1	0.05	0.00349394	0.0465061
145-2_LuCaP_35CR_LuCaP_NEPC_0.50_TF0.20	0.5	0.2	0.0863974	0.113603
173-1_LuCaP_92_LuCaP_NEPC_0.70_TF0.01	0.7	0.01	0.00146631	0.00853369
208-4_LuCaP_92_LuCaP_NEPC_0.30_TF0.03	0.3	0.03	0.00344599	0.026554
49_LuCaP_92_LuCaP_NEPC_0.50_TF0.20	0.5	0.2	0.0846178	0.115382
145-2_LuCaP_58_LuCaP_NEPC_0.30_TF0.10	0.3	0.1	0.0271122	0.0728878
145-2_LuCaP_35_LuCaP_NEPC_0.30_TF0.30	0.3	0.3	0.146437	0.153563
208-4_LuCaP_58_LuCaP_NEPC_0.30_TF0.30	0.3	0.3	0.0675216	0.232478
173-1_LuCaP_35_LuCaP_NEPC_0.70_TF0.20	0.7	0.2	0.0491324	0.150868
93_LuCaP_XX_LuCaP_NEPC_1.0_TF0.20	1	0.2	0	0.2
173-1_LuCaP_58_LuCaP_NEPC_0.50_TF0.01	0.5	0.01	0.00108234	0.00891766
208-4_LuCaP_92_LuCaP_NEPC_0.10_TF0.05	0.1	0.05	0.0081383	0.0418617
49_LuCaP_35_LuCaP_NEPC_0.90_TF0.10	0.9	0.1	0.0387203	0.0612797
145-2_LuCaP_92_LuCaP_NEPC_0.50_TF0.10	0.5	0.1	0.0289081	0.0710919
173-1_LuCaP_136CR_LuCaP_NEPC_0.10_TF0.03	0.1	0.03	0.00954252	0.0204575
49_LuCaP_92_LuCaP_NEPC_0.70_TF0.03	0.7	0.03	0.00596202	0.024038
145-2_LuCaP_136CR_LuCaP_NEPC_0.70_TF0.30	0.7	0.3	0.0776173	0.222383
208-4_LuCaP_35CR_LuCaP_NEPC_0.90_TF0.05	0.9	0.05	0.0143028	0.0356972
93_LuCaP_35_LuCaP_NEPC_0.30_TF0.05	0.3	0.05	0.00653604	0.043464
93_LuCaP_136CR_LuCaP_NEPC_0.30_TF0.05	0.3	0.05	0.0122444	0.0377556
49_LuCaP_92_LuCaP_NEPC_0.90_TF0.10	0.9	0.1	0.0304544	0.0695456
145-2_LuCaP_35CR_LuCaP_NEPC_0.50_TF0.05	0.5	0.05	0.0180713	0.0319287
49_LuCaP_35CR_LuCaP_NEPC_0.70_TF0.10	0.7	0.1	0.0430861	0.0569139
145-2_LuCaP_136CR_LuCaP_NEPC_0.90_TF0.05	0.9	0.05	0.017868	0.032132
93_LuCaP_136CR_LuCaP_NEPC_0.70_TF0.30	0.7	0.3	0.124255	0.175745
93_LuCaP_92_LuCaP_NEPC_0.70_TF0.30	0.7	0.3	0.0207655	0.279234
173-1_LuCaP_136CR_LuCaP_NEPC_0.10_TF0.20	0.1	0.2	0.0804252	0.119575
145-2_LuCaP_58_LuCaP_NEPC_0.30_TF0.03	0.3	0.03	0.00547248	0.0245275
208-4_LuCaP_35_LuCaP_NEPC_0.10_TF0.05	0.1	0.05	0.0112309	0.0387691
49_LuCaP_35CR_LuCaP_NEPC_0.70_TF0.30	0.7	0.3	0.142036	0.157964
208-4_LuCaP_35CR_LuCaP_NEPC_0.90_TF0.01	0.9	0.01	0.00243425	0.00756575
208-4_LuCaP_XX_LuCaP_NEPC_1.0_TF0.10	1	0.1	0	0.1
145-2_LuCaP_92_LuCaP_NEPC_0.90_TF0.10	0.9	0.1	0.00959589	0.0904041
208-4_LuCaP_35CR_LuCaP_NEPC_0.10_TF0.10	0.1	0.1	0.0411472	0.0588528
145-2_LuCaP_35CR_LuCaP_NEPC_0.90_TF0.03	0.9	0.03	0.00421689	0.0257831
49_LuCaP_58_LuCaP_NEPC_0.30_TF0.30	0.3	0.3	0.0973049	0.202695
49_LuCaP_136CR_LuCaP_NEPC_0.70_TF0.20	0.7	0.2	0.090304	0.109696
208-4_LuCaP_35CR_LuCaP_NEPC_0.50_TF0.03	0.5	0.03	0.00735591	0.0226441
173-1_LuCaP_XX_LuCaP_NEPC_1.0_TF0.01	1	0.01	0.00155979	0.00844021
208-4_LuCaP_35_LuCaP_NEPC_0.30_TF0.30	0.3	0.3	0.138774	0.161226
173-1_LuCaP_35_LuCaP_NEPC_0.70_TF0.01	0.7	0.01	0.00201327	0.00798673
93_LuCaP_92_LuCaP_NEPC_0.10_TF0.10	0.1	0.1	0.0165218	0.0834782
49_LuCaP_35_LuCaP_NEPC_0.70_TF0.01	0.7	0.01	0.00285705	0.00714295
93_LuCaP_92_LuCaP_NEPC_0.30_TF0.05	0.3	0.05	0.00375143	0.0462486
145-2_LuCaP_136CR_LuCaP_NEPC_0.30_TF0.20	0.3	0.2	0.0438069	0.156193
208-4_LuCaP_58_LuCaP_NEPC_0.70_TF0.30	0.7	0.3	0.0343993	0.265601
173-1_LuCaP_92_LuCaP_NEPC_0.10_TF0.30	0.1	0.3	0.175714	0.124286
58_LuCaP_XX_LuCaP_NEPC_0.0_TF0.03	0	0.03	0.00850056	0.0214994
93_LuCaP_35CR_LuCaP_NEPC_0.70_TF0.03	0.7	0.03	0.00453021	0.0254698
173-1_LuCaP_136CR_LuCaP_NEPC_0.70_TF0.30	0.7	0.3	0.0535257	0.246474
208-4_LuCaP_136CR_LuCaP_NEPC_0.10_TF0.05	0.1	0.05	0.0193195	0.0306805
93_LuCaP_35CR_LuCaP_NEPC_0.50_TF0.03	0.5	0.03	0.0045078	0.0254922
208-4_LuCaP_92_LuCaP_NEPC_0.90_TF0.20	0.9	0.2	0.00664089	0.193359
173-1_LuCaP_58_LuCaP_NEPC_0.50_TF0.10	0.5	0.1	0.0264855	0.0735145
145-2_LuCaP_35_LuCaP_NEPC_0.10_TF0.30	0.1	0.3	0.185493	0.114507
145-2_LuCaP_92_LuCaP_NEPC_0.10_TF0.10	0.1	0.1	0.0349349	0.0650651
93_LuCaP_136CR_LuCaP_NEPC_0.70_TF0.20	0.7	0.2	0.0663082	0.133692
145-2_LuCaP_92_LuCaP_NEPC_0.30_TF0.30	0.3	0.3	0.128596	0.171404
208-4_LuCaP_35CR_LuCaP_NEPC_0.30_TF0.05	0.3	0.05	0.0143712	0.0356288
173-1_LuCaP_136CR_LuCaP_NEPC_0.10_TF0.10	0.1	0.1	0.0341969	0.0658031
93_LuCaP_XX_LuCaP_NEPC_1.0_TF0.30	1	0.3	0	0.3
145-2_LuCaP_35_LuCaP_NEPC_0.50_TF0.30	0.5	0.3	0.12922	0.17078
49_LuCaP_35_LuCaP_NEPC_0.10_TF0.03	0.1	0.03	0.00894455	0.0210554
49_LuCaP_92_LuCaP_NEPC_0.90_TF0.30	0.9	0.3	0.0472151	0.252785
93_LuCaP_35CR_LuCaP_NEPC_0.70_TF0.05	0.7	0.05	0.00822221	0.0417778
208-4_LuCaP_92_LuCaP_NEPC_0.90_TF0.10	0.9	0.1	0.0139372	0.0860628
145-2_LuCaP_92_LuCaP_NEPC_0.70_TF0.10	0.7	0.1	0.0288578	0.0711422
208-4_LuCaP_35_LuCaP_NEPC_0.10_TF0.01	0.1	0.01	0.00215171	0.00784829
93_LuCaP_136CR_LuCaP_NEPC_0.90_TF0.05	0.9	0.05	0	0.05
173-1_LuCaP_58_LuCaP_NEPC_0.30_TF0.30	0.3	0.3	0.0780054	0.221995
93_LuCaP_35CR_LuCaP_NEPC_0.30_TF0.20	0.3	0.2	0.0491758	0.150824
93_LuCaP_58_LuCaP_NEPC_0.10_TF0.03	0.1	0.03	0.00404863	0.0259514
173-1_LuCaP_92_LuCaP_NEPC_0.90_TF0.01	0.9	0.01	0.00145945	0.00854055
145-2_LuCaP_92_LuCaP_NEPC_0.70_TF0.30	0.7	0.3	0.106528	0.193472
93_LuCaP_92_LuCaP_NEPC_0.70_TF0.10	0.7	0.1	0.00579207	0.0942079
145-2_LuCaP_58_LuCaP_NEPC_0.90_TF0.01	0.9	0.01	0.00180187	0.00819813
173-1_LuCaP_35_LuCaP_NEPC_0.50_TF0.30	0.5	0.3	0.107394	0.192606
93_LuCaP_35CR_LuCaP_NEPC_0.50_TF0.10	0.5	0.1	0.0169646	0.0830354
145-2_LuCaP_XX_LuCaP_NEPC_1.0_TF0.01	1	0.01	0.00185447	0.00814553
173-1_LuCaP_35_LuCaP_NEPC_0.50_TF0.01	0.5	0.01	0.00201472	0.00798528
49_LuCaP_58_LuCaP_NEPC_0.50_TF0.03	0.5	0.03	0.00499012	0.0250099
173-1_LuCaP_92_LuCaP_NEPC_0.50_TF0.30	0.5	0.3	0.0839604	0.21604
49_LuCaP_58_LuCaP_NEPC_0.90_TF0.30	0.9	0.3	0.019906	0.280094
93_LuCaP_35CR_LuCaP_NEPC_0.90_TF0.20	0.9	0.2	0	0.2
208-4_LuCaP_XX_LuCaP_NEPC_1.0_TF0.01	1	0.01	0.00147175	0.00852825
208-4_LuCaP_35_LuCaP_NEPC_0.50_TF0.03	0.5	0.03	0.00645937	0.0235406
208-4_LuCaP_92_LuCaP_NEPC_0.90_TF0.01	0.9	0.01	0.00146977	0.00853023
173-1_LuCaP_35CR_LuCaP_NEPC_0.90_TF0.03	0.9	0.03	0.00735919	0.0226408
145-2_LuCaP_92_LuCaP_NEPC_0.50_TF0.20	0.5	0.2	0.0694296	0.13057
49_LuCaP_XX_LuCaP_NEPC_1.0_TF0.20	1	0.2	0	0.2
93_LuCaP_58_LuCaP_NEPC_0.90_TF0.01	0.9	0.01	0.00155172	0.00844828
145-2_LuCaP_92_LuCaP_NEPC_0.10_TF0.01	0.1	0.01	0.00211079	0.00788921
173-1_LuCaP_92_LuCaP_NEPC_0.50_TF0.20	0.5	0.2	0.0419935	0.158006
49_LuCaP_58_LuCaP_NEPC_0.90_TF0.01	0.9	0.01	0.00204692	0.00795308
208-4_LuCaP_136CR_LuCaP_NEPC_0.70_TF0.05	0.7	0.05	0.00857679	0.0414232
49_LuCaP_136CR_LuCaP_NEPC_0.50_TF0.05	0.5	0.05	0.0192385	0.0307615
145-2_LuCaP_58_LuCaP_NEPC_0.10_TF0.01	0.1	0.01	0.00206179	0.00793821
136CR_LuCaP_XX_LuCaP_NEPC_0.0_TF0.30	0	0.3	0.208014	0.0919864
49_LuCaP_92_LuCaP_NEPC_0.30_TF0.20	0.3	0.2	0.0842307	0.115769
173-1_LuCaP_35CR_LuCaP_NEPC_0.50_TF0.30	0.5	0.3	0.117845	0.182155
145-2_LuCaP_92_LuCaP_NEPC_0.10_TF0.20	0.1	0.2	0.109844	0.0901559
49_LuCaP_92_LuCaP_NEPC_0.30_TF0.03	0.3	0.03	0.00598973	0.0240103
173-1_LuCaP_92_LuCaP_NEPC_0.70_TF0.20	0.7	0.2	0.0343094	0.165691
93_LuCaP_92_LuCaP_NEPC_0.10_TF0.30	0.1	0.3	0.130687	0.169313
208-4_LuCaP_58_LuCaP_NEPC_0.50_TF0.20	0.5	0.2	0.0481626	0.151837
208-4_LuCaP_35CR_LuCaP_NEPC_0.90_TF0.10	0.9	0.1	0.0270211	0.0729789
208-4_LuCaP_35CR_LuCaP_NEPC_0.10_TF0.03	0.1	0.03	0.00737625	0.0226238
93_LuCaP_35_LuCaP_NEPC_0.90_TF0.03	0.9	0.03	0.00589391	0.0241061
145-2_LuCaP_35_LuCaP_NEPC_0.10_TF0.20	0.1	0.2	0.116239	0.0837614
49_LuCaP_35CR_LuCaP_NEPC_0.50_TF0.05	0.5	0.05	0.0190295	0.0309705
49_LuCaP_XX_LuCaP_NEPC_1.0_TF0.05	1	0.05	0.000557303	0.0494427
208-4_LuCaP_35_LuCaP_NEPC_0.30_TF0.03	0.3	0.03	0.00638956	0.0236104
49_LuCaP_92_LuCaP_NEPC_0.30_TF0.01	0.3	0.01	0.00219813	0.00780187
173-1_LuCaP_58_LuCaP_NEPC_0.90_TF0.30	0.9	0.3	0.00939645	0.290604
49_LuCaP_35CR_LuCaP_NEPC_0.30_TF0.05	0.3	0.05	0.0190195	0.0309805
145-2_LuCaP_35CR_LuCaP_NEPC_0.10_TF0.20	0.1	0.2	0.114593	0.0854066
173-1_LuCaP_35CR_LuCaP_NEPC_0.70_TF0.20	0.7	0.2	0.0555592	0.144441
145-2_LuCaP_35CR_LuCaP_NEPC_0.70_TF0.03	0.7	0.03	0.00949195	0.020508
208-4_LuCaP_35CR_LuCaP_NEPC_0.30_TF0.01	0.3	0.01	0.00242701	0.00757299
93_LuCaP_136CR_LuCaP_NEPC_0.90_TF0.03	0.9	0.03	0	0.03
93_LuCaP_58_LuCaP_NEPC_0.50_TF0.01	0.5	0.01	0.000847291	0.00915271
145-2_LuCaP_136CR_LuCaP_NEPC_0.70_TF0.01	0.7	0.01	0.00285989	0.00714011
49_LuCaP_136CR_LuCaP_NEPC_0.70_TF0.30	0.7	0.3	0.10658	0.19342
145-2_LuCaP_XX_LuCaP_NEPC_1.0_TF0.30	1	0.3	0.0328562	0.267144
49_LuCaP_58_LuCaP_NEPC_0.30_TF0.05	0.3	0.05	0.0087113	0.0412887
93_LuCaP_35_LuCaP_NEPC_0.90_TF0.05	0.9	0.05	0.0113901	0.0386099
145-2_LuCaP_92_LuCaP_NEPC_0.10_TF0.30	0.1	0.3	0.180451	0.119549
208-4_LuCaP_58_LuCaP_NEPC_0.10_TF0.20	0.1	0.2	0.0703727	0.129627
208-4_LuCaP_136CR_LuCaP_NEPC_0.50_TF0.30	0.5	0.3	0.0182384	0.281762
49_LuCaP_136CR_LuCaP_NEPC_0.10_TF0.20	0.1	0.2	0.0862644	0.113736
173-1_LuCaP_35_LuCaP_NEPC_0.10_TF0.03	0.1	0.03	0.00667236	0.0233276
49_LuCaP_35_LuCaP_NEPC_0.70_TF0.10	0.7	0.1	0.0416928	0.0583072
208-4_LuCaP_58_LuCaP_NEPC_0.10_TF0.01	0.1	0.01	0.00173007	0.00826993
49_LuCaP_136CR_LuCaP_NEPC_0.30_TF0.05	0.3	0.05	0.0174166	0.0325834
136CR_LuCaP_XX_LuCaP_NEPC_0.0_TF0.01	0	0.01	0.00250406	0.00749594
93_LuCaP_58_LuCaP_NEPC_0.70_TF0.01	0.7	0.01	0.000526856	0.00947314
93_LuCaP_136CR_LuCaP_NEPC_0.90_TF0.20	0.9	0.2	0	0.2
208-4_LuCaP_58_LuCaP_NEPC_0.50_TF0.01	0.5	0.01	0.000968621	0.00903138
49_LuCaP_35_LuCaP_NEPC_0.90_TF0.05	0.9	0.05	0.0177197	0.0322803
145-2_LuCaP_35_LuCaP_NEPC_0.70_TF0.20	0.7	0.2	0.0828381	0.117162
208-4_LuCaP_136CR_LuCaP_NEPC_0.10_TF0.20	0.1	0.2	0.121794	0.0782055
173-1_LuCaP_136CR_LuCaP_NEPC_0.70_TF0.01	0.7	0.01	0.0022791	0.0077209
145-2_LuCaP_35_LuCaP_NEPC_0.50_TF0.01	0.5	0.01	0.00272698	0.00727302
145-2_LuCaP_58_LuCaP_NEPC_0.50_TF0.01	0.5	0.01	0.00142467	0.00857533
173-1_LuCaP_136CR_LuCaP_NEPC_0.70_TF0.10	0.7	0.1	0.021631	0.078369
49_LuCaP_35CR_LuCaP_NEPC_0.90_TF0.01	0.9	0.01	0.00305239	0.00694761
208-4_LuCaP_92_LuCaP_NEPC_0.30_TF0.20	0.3	0.2	0.0537149	0.146285
173-1_LuCaP_XX_LuCaP_NEPC_1.0_TF0.03	1	0.03	0.00226145	0.0277386
93_LuCaP_92_LuCaP_NEPC_0.50_TF0.03	0.5	0.03	0.0017125	0.0282875
173-1_LuCaP_92_LuCaP_NEPC_0.30_TF0.20	0.3	0.2	0.0593549	0.140645
173-1_LuCaP_92_LuCaP_NEPC_0.50_TF0.01	0.5	0.01	0.00146092	0.00853908
58_LuCaP_XX_LuCaP_NEPC_0.0_TF0.30	0	0.3	0.223713	0.0762873
208-4_LuCaP_35CR_LuCaP_NEPC_0.10_TF0.01	0.1	0.01	0.00242586	0.00757414
145-2_LuCaP_136CR_LuCaP_NEPC_0.90_TF0.01	0.9	0.01	0.00298331	0.00701669
145-2_LuCaP_35CR_LuCaP_NEPC_0.30_TF0.03	0.3	0.03	0.00941628	0.0205837
93_LuCaP_35CR_LuCaP_NEPC_0.70_TF0.30	0.7	0.3	0.0476974	0.252303
93_LuCaP_35_LuCaP_NEPC_0.10_TF0.10	0.1	0.1	0.0263906	0.0736094
145-2_LuCaP_58_LuCaP_NEPC_0.50_TF0.10	0.5	0.1	0.0301554	0.0698446
173-1_LuCaP_35_LuCaP_NEPC_0.30_TF0.20	0.3	0.2	0.0754897	0.12451
145-2_LuCaP_92_LuCaP_NEPC_0.30_TF0.05	0.3	0.05	0.0142481	0.0357519
173-1_LuCaP_58_LuCaP_NEPC_0.30_TF0.05	0.3	0.05	0.00787008	0.0421299
145-2_LuCaP_136CR_LuCaP_NEPC_0.70_TF0.10	0.7	0.1	0.0346505	0.0653495
145-2_LuCaP_35CR_LuCaP_NEPC_0.50_TF0.03	0.5	0.03	0.00946262	0.0205374
93_LuCaP_136CR_LuCaP_NEPC_0.70_TF0.03	0.7	0.03	0.00670396	0.023296
49_LuCaP_35_LuCaP_NEPC_0.30_TF0.05	0.3	0.05	0.0179307	0.0320693
35_LuCaP_XX_LuCaP_NEPC_0.0_TF0.10	0	0.1	0.0565834	0.0434166
49_LuCaP_35CR_LuCaP_NEPC_0.70_TF0.03	0.7	0.03	0.00967154	0.0203285
145-2_LuCaP_35_LuCaP_NEPC_0.70_TF0.03	0.7	0.03	0.00887811	0.0211219
93_LuCaP_136CR_LuCaP_NEPC_0.70_TF0.05	0.7	0.05	0.0109123	0.0390877
173-1_LuCaP_58_LuCaP_NEPC_0.10_TF0.01	0.1	0.01	0.00183531	0.00816469
93_LuCaP_92_LuCaP_NEPC_0.50_TF0.10	0.5	0.1	0.00579766	0.0942023
145-2_LuCaP_35_LuCaP_NEPC_0.50_TF0.10	0.5	0.1	0.0370253	0.0629747
92_LuCaP_XX_LuCaP_NEPC_0.0_TF0.03	0	0.03	0.00872329	0.0212767
58_LuCaP_XX_LuCaP_NEPC_0.0_TF0.20	0	0.2	0.151418	0.0485822
49_LuCaP_92_LuCaP_NEPC_0.90_TF0.05	0.9	0.05	0.0141469	0.0358531
49_LuCaP_35_LuCaP_NEPC_0.30_TF0.10	0.3	0.1	0.0417877	0.0582123
93_LuCaP_92_LuCaP_NEPC_0.30_TF0.01	0.3	0.01	0.00101708	0.00898292
173-1_LuCaP_35_LuCaP_NEPC_0.30_TF0.05	0.3	0.05	0.011615	0.038385
136CR_LuCaP_XX_LuCaP_NEPC_0.0_TF0.05	0	0.05	0.0225219	0.0274781
93_LuCaP_35CR_LuCaP_NEPC_0.50_TF0.05	0.5	0.05	0.00820329	0.0417967
208-4_LuCaP_58_LuCaP_NEPC_0.10_TF0.03	0.1	0.03	0.00517804	0.024822
93_LuCaP_35CR_LuCaP_NEPC_0.30_TF0.10	0.3	0.1	0.0169363	0.0830637
145-2_LuCaP_136CR_LuCaP_NEPC_0.10_TF0.10	0.1	0.1	0.0394418	0.0605582
173-1_LuCaP_35CR_LuCaP_NEPC_0.50_TF0.03	0.5	0.03	0.00728976	0.0227102
145-2_LuCaP_35CR_LuCaP_NEPC_0.30_TF0.05	0.3	0.05	0.0180138	0.0319862
49_LuCaP_92_LuCaP_NEPC_0.70_TF0.05	0.7	0.05	0.0141521	0.0358479
173-1_LuCaP_92_LuCaP_NEPC_0.10_TF0.03	0.1	0.03	0.00444664	0.0255534
93_LuCaP_35CR_LuCaP_NEPC_0.10_TF0.05	0.1	0.05	0.00907987	0.0409201
145-2_LuCaP_136CR_LuCaP_NEPC_0.90_TF0.20	0.9	0.2	0.0788581	0.121142
173-1_LuCaP_35CR_LuCaP_NEPC_0.30_TF0.03	0.3	0.03	0.00736482	0.0226352
93_LuCaP_92_LuCaP_NEPC_0.90_TF0.10	0.9	0.1	0.013736	0.086264
93_LuCaP_XX_LuCaP_NEPC_1.0_TF0.10	1	0.1	0	0.1
173-1_LuCaP_35_LuCaP_NEPC_0.70_TF0.10	0.7	0.1	0.024001	0.075999
173-1_LuCaP_92_LuCaP_NEPC_0.10_TF0.10	0.1	0.1	0.0311754	0.0688246
208-4_LuCaP_136CR_LuCaP_NEPC_0.70_TF0.30	0.7	0.3	0.0032138	0.296786
173-1_LuCaP_35CR_LuCaP_NEPC_0.90_TF0.10	0.9	0.1	0.0233233	0.0766767
173-1_LuCaP_58_LuCaP_NEPC_0.30_TF0.20	0.3	0.2	0.0629977	0.137002
93_LuCaP_136CR_LuCaP_NEPC_0.10_TF0.10	0.1	0.1	0.0388166	0.0611834
49_LuCaP_35CR_LuCaP_NEPC_0.30_TF0.20	0.3	0.2	0.0997238	0.100276
93_LuCaP_58_LuCaP_NEPC_0.50_TF0.10	0.5	0.1	0.0146246	0.0853754
145-2_LuCaP_136CR_LuCaP_NEPC_0.90_TF0.10	0.9	0.1	0.0350556	0.0649444
49_LuCaP_35_LuCaP_NEPC_0.70_TF0.05	0.7	0.05	0.0178402	0.0321598
49_LuCaP_58_LuCaP_NEPC_0.30_TF0.20	0.3	0.2	0.072527	0.127473
136CR_LuCaP_XX_LuCaP_NEPC_0.0_TF0.03	0	0.03	0.0117749	0.0182251
208-4_LuCaP_58_LuCaP_NEPC_0.70_TF0.20	0.7	0.2	0.0271078	0.172892
173-1_LuCaP_92_LuCaP_NEPC_0.70_TF0.05	0.7	0.05	0.0087362	0.0412638
173-1_LuCaP_XX_LuCaP_NEPC_1.0_TF0.10	1	0.1	0.00384734	0.0961527
208-4_LuCaP_35_LuCaP_NEPC_0.90_TF0.03	0.9	0.03	3.97085e-05	0.0299603
208-4_LuCaP_92_LuCaP_NEPC_0.70_TF0.03	0.7	0.03	0.00343042	0.0265696
35CR_LuCaP_XX_LuCaP_NEPC_0.0_TF0.30	0	0.3	0.206569	0.0934311
208-4_LuCaP_58_LuCaP_NEPC_0.70_TF0.10	0.7	0.1	0.0180036	0.0819964
208-4_LuCaP_136CR_LuCaP_NEPC_0.50_TF0.05	0.5	0.05	0.00751379	0.0424862
49_LuCaP_136CR_LuCaP_NEPC_0.70_TF0.10	0.7	0.1	0.0403338	0.0596662
145-2_LuCaP_58_LuCaP_NEPC_0.10_TF0.10	0.1	0.1	0.0317827	0.0682173
208-4_LuCaP_35_LuCaP_NEPC_0.30_TF0.20	0.3	0.2	0.0757467	0.124253
93_LuCaP_92_LuCaP_NEPC_0.30_TF0.10	0.3	0.1	0.0057943	0.0942057
49_LuCaP_35CR_LuCaP_NEPC_0.70_TF0.01	0.7	0.01	0.00305239	0.00694761
93_LuCaP_92_LuCaP_NEPC_0.70_TF0.05	0.7	0.05	0.00378631	0.0462137
93_LuCaP_58_LuCaP_NEPC_0.70_TF0.03	0.7	0.03	0.00201592	0.0279841
208-4_LuCaP_35CR_LuCaP_NEPC_0.30_TF0.03	0.3	0.03	0.00735656	0.0226434
93_LuCaP_35_LuCaP_NEPC_0.90_TF0.01	0.9	0.01	0.00197916	0.00802084
173-1_LuCaP_35_LuCaP_NEPC_0.50_TF0.05	0.5	0.05	0.0116142	0.0383858
93_LuCaP_58_LuCaP_NEPC_0.30_TF0.03	0.3	0.03	0.00205666	0.0279433
93_LuCaP_136CR_LuCaP_NEPC_0.30_TF0.01	0.3	0.01	0.00229023	0.00770977
49_LuCaP_58_LuCaP_NEPC_0.30_TF0.03	0.3	0.03	0.00396746	0.0260325
49_LuCaP_58_LuCaP_NEPC_0.10_TF0.20	0.1	0.2	0.102724	0.0972757
145-2_LuCaP_58_LuCaP_NEPC_0.30_TF0.05	0.3	0.05	0.0106479	0.0393521
49_LuCaP_92_LuCaP_NEPC_0.10_TF0.20	0.1	0.2	0.118036	0.0819642
49_LuCaP_58_LuCaP_NEPC_0.10_TF0.30	0.1	0.3	0.167904	0.132096
49_LuCaP_35_LuCaP_NEPC_0.10_TF0.10	0.1	0.1	0.0440496	0.0559504
145-2_LuCaP_58_LuCaP_NEPC_0.10_TF0.03	0.1	0.03	0.00795873	0.0220413
93_LuCaP_58_LuCaP_NEPC_0.10_TF0.30	0.1	0.3	0.074746	0.225254
208-4_LuCaP_35_LuCaP_NEPC_0.50_TF0.10	0.5	0.1	0.0276126	0.0723874
173-1_LuCaP_35_LuCaP_NEPC_0.10_TF0.05	0.1	0.05	0.0144566	0.0355434
208-4_LuCaP_136CR_LuCaP_NEPC_0.10_TF0.01	0.1	0.01	0.0031531	0.0068469
93_LuCaP_136CR_LuCaP_NEPC_0.10_TF0.01	0.1	0.01	0.00264821	0.00735179
49_LuCaP_35CR_LuCaP_NEPC_0.10_TF0.30	0.1	0.3	0.191214	0.108786
208-4_LuCaP_35_LuCaP_NEPC_0.70_TF0.10	0.7	0.1	0.027697	0.072303
145-2_LuCaP_XX_LuCaP_NEPC_1.0_TF0.03	1	0.03	0.00445721	0.0255428
173-1_LuCaP_58_LuCaP_NEPC_0.70_TF0.20	0.7	0.2	0.0209385	0.179062
173-1_LuCaP_58_LuCaP_NEPC_0.90_TF0.05	0.9	0.05	0.00600152	0.0439985
145-2_LuCaP_35_LuCaP_NEPC_0.30_TF0.03	0.3	0.03	0.00890432	0.0210957
49_LuCaP_35CR_LuCaP_NEPC_0.50_TF0.01	0.5	0.01	0.00304725	0.00695275
173-1_LuCaP_35_LuCaP_NEPC_0.90_TF0.01	0.9	0.01	0.00201722	0.00798278
208-4_LuCaP_136CR_LuCaP_NEPC_0.50_TF0.03	0.5	0.03	0.00460903	0.025391
49_LuCaP_35CR_LuCaP_NEPC_0.30_TF0.01	0.3	0.01	0.00304614	0.00695386
208-4_LuCaP_136CR_LuCaP_NEPC_0.90_TF0.30	0.9	0.3	0	0.3
208-4_LuCaP_35_LuCaP_NEPC_0.30_TF0.10	0.3	0.1	0.027694	0.072306
173-1_LuCaP_58_LuCaP_NEPC_0.10_TF0.03	0.1	0.03	0.00654241	0.0234576
49_LuCaP_35CR_LuCaP_NEPC_0.90_TF0.10	0.9	0.1	0.0390107	0.0609893
49_LuCaP_35CR_LuCaP_NEPC_0.90_TF0.20	0.9	0.2	0.0649615	0.135039
145-2_LuCaP_35CR_LuCaP_NEPC_0.90_TF0.10	0.9	0.1	0.0159424	0.0840576
173-1_LuCaP_35_LuCaP_NEPC_0.30_TF0.01	0.3	0.01	0.00201392	0.00798608
49_LuCaP_136CR_LuCaP_NEPC_0.30_TF0.03	0.3	0.03	0.00948865	0.0205113
49_LuCaP_35_LuCaP_NEPC_0.10_TF0.20	0.1	0.2	0.121983	0.0780169
208-4_LuCaP_35CR_LuCaP_NEPC_0.50_TF0.05	0.5	0.05	0.0143745	0.0356255
208-4_LuCaP_136CR_LuCaP_NEPC_0.50_TF0.20	0.5	0.2	0.0218832	0.178117
93_LuCaP_58_LuCaP_NEPC_0.10_TF0.10	0.1	0.1	0.0148947	0.0851053
49_LuCaP_92_LuCaP_NEPC_0.70_TF0.10	0.7	0.1	0.0308773	0.0691227
208-4_LuCaP_136CR_LuCaP_NEPC_0.30_TF0.10	0.3	0.1	0.027202	0.072798
208-4_LuCaP_58_LuCaP_NEPC_0.90_TF0.03	0.9	0.03	0.00270508	0.0272949
173-1_LuCaP_58_LuCaP_NEPC_0.10_TF0.05	0.1	0.05	0.0116948	0.0383052
93_LuCaP_136CR_LuCaP_NEPC_0.70_TF0.01	0.7	0.01	0.0020599	0.0079401
49_LuCaP_136CR_LuCaP_NEPC_0.90_TF0.20	0.9	0.2	0.0477581	0.152242
49_LuCaP_136CR_LuCaP_NEPC_0.50_TF0.01	0.5	0.01	0.00315543	0.00684457
173-1_LuCaP_35CR_LuCaP_NEPC_0.70_TF0.30	0.7	0.3	0.0891008	0.210899
173-1_LuCaP_92_LuCaP_NEPC_0.30_TF0.30	0.3	0.3	0.112677	0.187323
208-4_LuCaP_92_LuCaP_NEPC_0.90_TF0.03	0.9	0.03	0.00340474	0.0265953
93_LuCaP_35_LuCaP_NEPC_0.10_TF0.30	0.1	0.3	0.14875	0.15125
145-2_LuCaP_58_LuCaP_NEPC_0.50_TF0.30	0.5	0.3	0.0854602	0.21454
173-1_LuCaP_35CR_LuCaP_NEPC_0.90_TF0.20	0.9	0.2	0.0288806	0.171119
145-2_LuCaP_92_LuCaP_NEPC_0.90_TF0.30	0.9	0.3	0.00356424	0.296436
145-2_LuCaP_92_LuCaP_NEPC_0.50_TF0.01	0.5	0.01	0.00211796	0.00788204
49_LuCaP_58_LuCaP_NEPC_0.10_TF0.05	0.1	0.05	0.0129529	0.0370471
173-1_LuCaP_92_LuCaP_NEPC_0.90_TF0.05	0.9	0.05	0.0086541	0.0413459
173-1_LuCaP_35CR_LuCaP_NEPC_0.90_TF0.30	0.9	0.3	0.0295752	0.270425
145-2_LuCaP_35_LuCaP_NEPC_0.90_TF0.20	0.9	0.2	0.0593191	0.140681
173-1_LuCaP_35_LuCaP_NEPC_0.50_TF0.20	0.5	0.2	0.0573423	0.142658
208-4_LuCaP_136CR_LuCaP_NEPC_0.90_TF0.03	0.9	0.03	0.00390956	0.0260904
93_LuCaP_35CR_LuCaP_NEPC_0.90_TF0.10	0.9	0.1	0.00541782	0.0945822
173-1_LuCaP_35CR_LuCaP_NEPC_0.70_TF0.01	0.7	0.01	0.00225546	0.00774454
145-2_LuCaP_35_LuCaP_NEPC_0.70_TF0.05	0.7	0.05	0.0170791	0.0329209
173-1_LuCaP_136CR_LuCaP_NEPC_0.90_TF0.10	0.9	0.1	0.0156177	0.0843823
49_LuCaP_58_LuCaP_NEPC_0.50_TF0.05	0.5	0.05	0.0105518	0.0394482
93_LuCaP_35CR_LuCaP_NEPC_0.90_TF0.03	0.9	0.03	0.00172687	0.0282731
208-4_LuCaP_136CR_LuCaP_NEPC_0.30_TF0.01	0.3	0.01	0.00286388	0.00713612
208-4_LuCaP_58_LuCaP_NEPC_0.30_TF0.10	0.3	0.1	0.0172278	0.0827722
145-2_LuCaP_58_LuCaP_NEPC_0.90_TF0.10	0.9	0.1	0.0115425	0.0884575
208-4_LuCaP_35CR_LuCaP_NEPC_0.70_TF0.05	0.7	0.05	0.0142709	0.0357291
208-4_LuCaP_35_LuCaP_NEPC_0.90_TF0.30	0.9	0.3	0	0.3
208-4_LuCaP_136CR_LuCaP_NEPC_0.50_TF0.10	0.5	0.1	0.0127356	0.0872644
208-4_LuCaP_58_LuCaP_NEPC_0.30_TF0.03	0.3	0.03	0.00251823	0.0274818
93_LuCaP_136CR_LuCaP_NEPC_0.50_TF0.20	0.5	0.2	0.0904138	0.109586
145-2_LuCaP_92_LuCaP_NEPC_0.90_TF0.05	0.9	0.05	0.00871298	0.041287
173-1_LuCaP_35_LuCaP_NEPC_0.90_TF0.30	0.9	0.3	0.0258591	0.274141
145-2_LuCaP_35_LuCaP_NEPC_0.30_TF0.05	0.3	0.05	0.0170763	0.0329237
93_LuCaP_92_LuCaP_NEPC_0.70_TF0.20	0.7	0.2	0.0123424	0.187658
49_LuCaP_92_LuCaP_NEPC_0.10_TF0.03	0.1	0.03	0.00592853	0.0240715
49_LuCaP_35CR_LuCaP_NEPC_0.90_TF0.05	0.9	0.05	0.0190069	0.0309931
35CR_LuCaP_XX_LuCaP_NEPC_0.0_TF0.03	0	0.03	0.011506	0.018494
49_LuCaP_92_LuCaP_NEPC_0.50_TF0.01	0.5	0.01	0.00219017	0.00780983
49_LuCaP_136CR_LuCaP_NEPC_0.30_TF0.01	0.3	0.01	0.0028675	0.0071325
173-1_LuCaP_136CR_LuCaP_NEPC_0.30_TF0.10	0.3	0.1	0.0327059	0.0672941
173-1_LuCaP_58_LuCaP_NEPC_0.50_TF0.30	0.5	0.3	0.0651692	0.234831
145-2_LuCaP_136CR_LuCaP_NEPC_0.70_TF0.05	0.7	0.05	0.0177582	0.0322418
173-1_LuCaP_58_LuCaP_NEPC_0.90_TF0.03	0.9	0.03	0.00496614	0.0250339
173-1_LuCaP_58_LuCaP_NEPC_0.90_TF0.10	0.9	0.1	0.0074615	0.0925385
58_LuCaP_XX_LuCaP_NEPC_0.0_TF0.10	0	0.1	0.051208	0.048792
208-4_LuCaP_35CR_LuCaP_NEPC_0.90_TF0.30	0.9	0.3	0.0250223	0.274978
35CR_LuCaP_XX_LuCaP_NEPC_0.0_TF0.05	0	0.05	0.0222042	0.0277958
49_LuCaP_92_LuCaP_NEPC_0.70_TF0.01	0.7	0.01	0.00218393	0.00781607
145-2_LuCaP_35CR_LuCaP_NEPC_0.10_TF0.30	0.1	0.3	0.186102	0.113898
35_LuCaP_XX_LuCaP_NEPC_0.0_TF0.20	0	0.2	0.144848	0.0551516
145-2_LuCaP_136CR_LuCaP_NEPC_0.50_TF0.10	0.5	0.1	0.0152947	0.0847053
145-2_LuCaP_58_LuCaP_NEPC_0.10_TF0.20	0.1	0.2	0.0858038	0.114196
208-4_LuCaP_92_LuCaP_NEPC_0.10_TF0.01	0.1	0.01	0.00148208	0.00851792
145-2_LuCaP_58_LuCaP_NEPC_0.70_TF0.10	0.7	0.1	0.0258963	0.0741037
173-1_LuCaP_58_LuCaP_NEPC_0.50_TF0.05	0.5	0.05	0.00966093	0.0403391
145-2_LuCaP_35CR_LuCaP_NEPC_0.70_TF0.05	0.7	0.05	0.0181066	0.0318934
145-2_LuCaP_35_LuCaP_NEPC_0.30_TF0.20	0.3	0.2	0.0858141	0.114186
208-4_LuCaP_92_LuCaP_NEPC_0.10_TF0.03	0.1	0.03	0.00347479	0.0265252
49_LuCaP_XX_LuCaP_NEPC_1.0_TF0.10	1	0.1	0	0.1
35_LuCaP_XX_LuCaP_NEPC_0.0_TF0.05	0	0.05	0.0223497	0.0276503
145-2_LuCaP_136CR_LuCaP_NEPC_0.30_TF0.01	0.3	0.01	0.00213157	0.00786843
208-4_LuCaP_35_LuCaP_NEPC_0.90_TF0.20	0.9	0.2	0	0.2
173-1_LuCaP_92_LuCaP_NEPC_0.50_TF0.10	0.5	0.1	0.0159282	0.0840718
208-4_LuCaP_58_LuCaP_NEPC_0.10_TF0.30	0.1	0.3	0.127728	0.172272
93_LuCaP_58_LuCaP_NEPC_0.90_TF0.10	0.9	0.1	0.00943251	0.0905675
208-4_LuCaP_35_LuCaP_NEPC_0.10_TF0.30	0.1	0.3	0.184979	0.115021
145-2_LuCaP_35_LuCaP_NEPC_0.90_TF0.01	0.9	0.01	0.00263325	0.00736675
49_LuCaP_92_LuCaP_NEPC_0.50_TF0.30	0.5	0.3	0.123465	0.176535
173-1_LuCaP_58_LuCaP_NEPC_0.90_TF0.20	0.9	0.2	0.0113465	0.188653
49_LuCaP_136CR_LuCaP_NEPC_0.90_TF0.30	0.9	0.3	0.0496256	0.250374
173-1_LuCaP_35CR_LuCaP_NEPC_0.90_TF0.01	0.9	0.01	0.00226587	0.00773413
208-4_LuCaP_35_LuCaP_NEPC_0.70_TF0.05	0.7	0.05	0.0122766	0.0377234
49_LuCaP_58_LuCaP_NEPC_0.10_TF0.03	0.1	0.03	0.0066718	0.0233282
208-4_LuCaP_92_LuCaP_NEPC_0.10_TF0.20	0.1	0.2	0.105271	0.0947289
173-1_LuCaP_35CR_LuCaP_NEPC_0.10_TF0.10	0.1	0.1	0.0419401	0.0580599
208-4_LuCaP_58_LuCaP_NEPC_0.50_TF0.10	0.5	0.1	0.0218669	0.0781331
173-1_LuCaP_58_LuCaP_NEPC_0.10_TF0.20	0.1	0.2	0.0734256	0.126574
49_LuCaP_58_LuCaP_NEPC_0.90_TF0.20	0.9	0.2	0.0123969	0.187603
173-1_LuCaP_136CR_LuCaP_NEPC_0.50_TF0.01	0.5	0.01	0.00227597	0.00772403
93_LuCaP_35CR_LuCaP_NEPC_0.50_TF0.01	0.5	0.01	0.00177806	0.00822194
173-1_LuCaP_35CR_LuCaP_NEPC_0.30_TF0.01	0.3	0.01	0.00227087	0.00772913
145-2_LuCaP_136CR_LuCaP_NEPC_0.10_TF0.03	0.1	0.03	0.0077049	0.0222951
93_LuCaP_92_LuCaP_NEPC_0.70_TF0.01	0.7	0.01	0.00102645	0.00897355
173-1_LuCaP_35CR_LuCaP_NEPC_0.10_TF0.30	0.1	0.3	0.183849	0.116151
49_LuCaP_136CR_LuCaP_NEPC_0.10_TF0.03	0.1	0.03	0.00483076	0.0251692
208-4_LuCaP_92_LuCaP_NEPC_0.10_TF0.30	0.1	0.3	0.177855	0.122145
93_LuCaP_58_LuCaP_NEPC_0.90_TF0.30	0.9	0.3	0.0173815	0.282619
208-4_LuCaP_XX_LuCaP_NEPC_1.0_TF0.30	1	0.3	0	0.3
145-2_LuCaP_XX_LuCaP_NEPC_1.0_TF0.10	1	0.1	0.010401	0.089599
145-2_LuCaP_58_LuCaP_NEPC_0.50_TF0.03	0.5	0.03	0.00647714	0.0235229
208-4_LuCaP_92_LuCaP_NEPC_0.50_TF0.30	0.5	0.3	0.0745393	0.225461
173-1_LuCaP_92_LuCaP_NEPC_0.10_TF0.20	0.1	0.2	0.10488	0.0951197
93_LuCaP_58_LuCaP_NEPC_0.70_TF0.20	0.7	0.2	0.00667346	0.193327
173-1_LuCaP_136CR_LuCaP_NEPC_0.90_TF0.03	0.9	0.03	0.00735048	0.0226495
93_LuCaP_35_LuCaP_NEPC_0.30_TF0.10	0.3	0.1	0.0137108	0.0862892
173-1_LuCaP_35_LuCaP_NEPC_0.70_TF0.30	0.7	0.3	0.0805392	0.219461
145-2_LuCaP_35CR_LuCaP_NEPC_0.70_TF0.20	0.7	0.2	0.0865939	0.113406
49_LuCaP_35_LuCaP_NEPC_0.50_TF0.20	0.5	0.2	0.0978589	0.102141
49_LuCaP_92_LuCaP_NEPC_0.30_TF0.30	0.3	0.3	0.138735	0.161265
208-4_LuCaP_35_LuCaP_NEPC_0.10_TF0.10	0.1	0.1	0.0388201	0.0611799
173-1_LuCaP_35_LuCaP_NEPC_0.70_TF0.03	0.7	0.03	0.00666167	0.0233383
173-1_LuCaP_58_LuCaP_NEPC_0.70_TF0.10	0.7	0.1	0.0158671	0.0841329
208-4_LuCaP_35CR_LuCaP_NEPC_0.50_TF0.10	0.5	0.1	0.0315383	0.0684617
49_LuCaP_58_LuCaP_NEPC_0.90_TF0.05	0.9	0.05	0.00933411	0.0406659
208-4_LuCaP_136CR_LuCaP_NEPC_0.70_TF0.10	0.7	0.1	0.0145399	0.0854601
208-4_LuCaP_35_LuCaP_NEPC_0.30_TF0.01	0.3	0.01	0.00215079	0.00784921
145-2_LuCaP_92_LuCaP_NEPC_0.70_TF0.01	0.7	0.01	0.00211796	0.00788204
208-4_LuCaP_58_LuCaP_NEPC_0.10_TF0.10	0.1	0.1	0.0231062	0.0768938
93_LuCaP_58_LuCaP_NEPC_0.70_TF0.05	0.7	0.05	0.00417267	0.0458273
173-1_LuCaP_92_LuCaP_NEPC_0.90_TF0.10	0.9	0.1	0.01529	0.08471
145-2_LuCaP_35_LuCaP_NEPC_0.10_TF0.10	0.1	0.1	0.0433077	0.0566923
49_LuCaP_35_LuCaP_NEPC_0.90_TF0.30	0.9	0.3	0.0698781	0.230122
208-4_LuCaP_92_LuCaP_NEPC_0.70_TF0.10	0.7	0.1	0.014978	0.085022
93_LuCaP_35_LuCaP_NEPC_0.10_TF0.05	0.1	0.05	0.00747029	0.0425297
49_LuCaP_XX_LuCaP_NEPC_1.0_TF0.01	1	0.01	0.00186264	0.00813736
145-2_LuCaP_35_LuCaP_NEPC_0.30_TF0.10	0.3	0.1	0.037017	0.062983
173-1_LuCaP_92_LuCaP_NEPC_0.50_TF0.05	0.5	0.05	0.00869538	0.0413046
49_LuCaP_35CR_LuCaP_NEPC_0.10_TF0.10	0.1	0.1	0.0449311	0.0550689
208-4_LuCaP_92_LuCaP_NEPC_0.50_TF0.05	0.5	0.05	0.00806283	0.0419372
35CR_LuCaP_XX_LuCaP_NEPC_0.0_TF0.10	0	0.1	0.0535359	0.0464641
93_LuCaP_58_LuCaP_NEPC_0.70_TF0.10	0.7	0.1	0.0093945	0.0906055
93_LuCaP_35CR_LuCaP_NEPC_0.50_TF0.30	0.5	0.3	0.0697549	0.230245
208-4_LuCaP_35_LuCaP_NEPC_0.50_TF0.01	0.5	0.01	0.00214127	0.00785873
145-2_LuCaP_92_LuCaP_NEPC_0.90_TF0.20	0.9	0.2	0.00475396	0.195246
49_LuCaP_35CR_LuCaP_NEPC_0.90_TF0.03	0.9	0.03	0.0096175	0.0203825
49_LuCaP_58_LuCaP_NEPC_0.90_TF0.10	0.9	0.1	0.00894144	0.0910586
145-2_LuCaP_92_LuCaP_NEPC_0.50_TF0.05	0.5	0.05	0.0142448	0.0357552
173-1_LuCaP_92_LuCaP_NEPC_0.70_TF0.10	0.7	0.1	0.015923	0.084077
49_LuCaP_92_LuCaP_NEPC_0.90_TF0.03	0.9	0.03	0.00587848	0.0241215
208-4_LuCaP_XX_LuCaP_NEPC_1.0_TF0.03	1	0.03	0.000147713	0.0298523
35_LuCaP_XX_LuCaP_NEPC_0.0_TF0.01	0	0.01	0.00282506	0.00717494
145-2_LuCaP_136CR_LuCaP_NEPC_0.50_TF0.05	0.5	0.05	0.00869967	0.0413003
173-1_LuCaP_35CR_LuCaP_NEPC_0.30_TF0.10	0.3	0.1	0.0265026	0.0734974
208-4_LuCaP_58_LuCaP_NEPC_0.30_TF0.01	0.3	0.01	0.000575531	0.00942447
145-2_LuCaP_35CR_LuCaP_NEPC_0.70_TF0.01	0.7	0.01	0.00293572	0.00706428
35_LuCaP_XX_LuCaP_NEPC_0.0_TF0.30	0	0.3	0.211906	0.0880942
49_LuCaP_35_LuCaP_NEPC_0.90_TF0.01	0.9	0.01	0.00285683	0.00714317
145-2_LuCaP_92_LuCaP_NEPC_0.50_TF0.03	0.5	0.03	0.00643297	0.023567
145-2_LuCaP_136CR_LuCaP_NEPC_0.50_TF0.30	0.5	0.3	0.0621896	0.23781
208-4_LuCaP_58_LuCaP_NEPC_0.30_TF0.20	0.3	0.2	0.0566425	0.143358
93_LuCaP_35CR_LuCaP_NEPC_0.10_TF0.10	0.1	0.1	0.0291019	0.0708981
173-1_LuCaP_35CR_LuCaP_NEPC_0.10_TF0.20	0.1	0.2	0.112402	0.0875977
93_LuCaP_58_LuCaP_NEPC_0.50_TF0.30	0.5	0.3	0.0216576	0.278342
93_LuCaP_35CR_LuCaP_NEPC_0.50_TF0.20	0.5	0.2	0.0350968	0.164903
93_LuCaP_136CR_LuCaP_NEPC_0.10_TF0.30	0.1	0.3	0.183566	0.116434
93_LuCaP_35_LuCaP_NEPC_0.10_TF0.01	0.1	0.01	0.00153028	0.00846972
173-1_LuCaP_136CR_LuCaP_NEPC_0.10_TF0.05	0.1	0.05	0.0174473	0.0325527
173-1_LuCaP_58_LuCaP_NEPC_0.70_TF0.01	0.7	0.01	0.000635038	0.00936496
93_LuCaP_35_LuCaP_NEPC_0.70_TF0.03	0.7	0.03	0.00362805	0.026372
93_LuCaP_92_LuCaP_NEPC_0.50_TF0.30	0.5	0.3	0.0328392	0.267161
208-4_LuCaP_92_LuCaP_NEPC_0.30_TF0.10	0.3	0.1	0.0150877	0.0849123
49_LuCaP_35_LuCaP_NEPC_0.30_TF0.20	0.3	0.2	0.0976842	0.102316
145-2_LuCaP_35_LuCaP_NEPC_0.10_TF0.05	0.1	0.05	0.0171284	0.0328716
145-2_LuCaP_92_LuCaP_NEPC_0.10_TF0.05	0.1	0.05	0.0142315	0.0357685
208-4_LuCaP_35_LuCaP_NEPC_0.70_TF0.30	0.7	0.3	0.0880668	0.211933
145-2_LuCaP_58_LuCaP_NEPC_0.70_TF0.30	0.7	0.3	0.0586831	0.241317
49_LuCaP_35_LuCaP_NEPC_0.30_TF0.03	0.3	0.03	0.0089887	0.0210113
173-1_LuCaP_136CR_LuCaP_NEPC_0.50_TF0.05	0.5	0.05	0.0119958	0.0380042
145-2_LuCaP_58_LuCaP_NEPC_0.30_TF0.30	0.3	0.3	0.0966646	0.203335
208-4_LuCaP_136CR_LuCaP_NEPC_0.30_TF0.03	0.3	0.03	0.00955684	0.0204432
173-1_LuCaP_136CR_LuCaP_NEPC_0.30_TF0.03	0.3	0.03	0.00828816	0.0217118
145-2_LuCaP_35CR_LuCaP_NEPC_0.30_TF0.20	0.3	0.2	0.0890997	0.1109
173-1_LuCaP_35_LuCaP_NEPC_0.50_TF0.10	0.5	0.1	0.0240003	0.0759997
208-4_LuCaP_136CR_LuCaP_NEPC_0.90_TF0.10	0.9	0.1	0.0121681	0.0878319
93_LuCaP_92_LuCaP_NEPC_0.30_TF0.03	0.3	0.03	0.00163108	0.0283689
173-1_LuCaP_35_LuCaP_NEPC_0.10_TF0.20	0.1	0.2	0.112817	0.0871827
208-4_LuCaP_35_LuCaP_NEPC_0.50_TF0.05	0.5	0.05	0.0122534	0.0377466
92_LuCaP_XX_LuCaP_NEPC_0.0_TF0.05	0	0.05	0.020645	0.029355
145-2_LuCaP_35_LuCaP_NEPC_0.90_TF0.03	0.9	0.03	0.00808878	0.0219112
145-2_LuCaP_58_LuCaP_NEPC_0.70_TF0.05	0.7	0.05	0.0107527	0.0392473
145-2_LuCaP_92_LuCaP_NEPC_0.70_TF0.05	0.7	0.05	0.0142347	0.0357653
208-4_LuCaP_35_LuCaP_NEPC_0.90_TF0.10	0.9	0.1	0	0.1
49_LuCaP_136CR_LuCaP_NEPC_0.50_TF0.03	0.5	0.03	0.0103093	0.0196907
145-2_LuCaP_136CR_LuCaP_NEPC_0.10_TF0.20	0.1	0.2	0.111126	0.0888741
49_LuCaP_35_LuCaP_NEPC_0.10_TF0.01	0.1	0.01	0.00286671	0.00713329
49_LuCaP_136CR_LuCaP_NEPC_0.10_TF0.10	0.1	0.1	0.0261603	0.0738397
49_LuCaP_136CR_LuCaP_NEPC_0.90_TF0.01	0.9	0.01	0.0031652	0.0068348
145-2_LuCaP_58_LuCaP_NEPC_0.50_TF0.05	0.5	0.05	0.0124818	0.0375182
49_LuCaP_35CR_LuCaP_NEPC_0.70_TF0.20	0.7	0.2	0.0995239	0.100476
173-1_LuCaP_58_LuCaP_NEPC_0.10_TF0.10	0.1	0.1	0.0279668	0.0720332
93_LuCaP_92_LuCaP_NEPC_0.90_TF0.01	0.9	0.01	0.00228349	0.00771651
145-2_LuCaP_92_LuCaP_NEPC_0.30_TF0.10	0.3	0.1	0.0289471	0.0710529
173-1_LuCaP_35CR_LuCaP_NEPC_0.50_TF0.01	0.5	0.01	0.00226252	0.00773748
145-2_LuCaP_136CR_LuCaP_NEPC_0.30_TF0.10	0.3	0.1	0.015263	0.084737
49_LuCaP_35CR_LuCaP_NEPC_0.30_TF0.30	0.3	0.3	0.161241	0.138759
145-2_LuCaP_136CR_LuCaP_NEPC_0.50_TF0.01	0.5	0.01	0.00212738	0.00787262
145-2_LuCaP_35_LuCaP_NEPC_0.50_TF0.03	0.5	0.03	0.00890763	0.0210924
173-1_LuCaP_35_LuCaP_NEPC_0.10_TF0.01	0.1	0.01	0.00201809	0.00798191
208-4_LuCaP_136CR_LuCaP_NEPC_0.70_TF0.01	0.7	0.01	0.00186804	0.00813196
49_LuCaP_35CR_LuCaP_NEPC_0.50_TF0.10	0.5	0.1	0.0432376	0.0567624
93_LuCaP_35CR_LuCaP_NEPC_0.90_TF0.05	0.9	0.05	0.00393184	0.0460682
208-4_LuCaP_136CR_LuCaP_NEPC_0.70_TF0.20	0.7	0.2	0.00820206	0.191798
93_LuCaP_35_LuCaP_NEPC_0.90_TF0.10	0.9	0.1	0.0228411	0.0771589
49_LuCaP_35_LuCaP_NEPC_0.70_TF0.20	0.7	0.2	0.0976998	0.1023
93_LuCaP_136CR_LuCaP_NEPC_0.10_TF0.03	0.1	0.03	0.00887054	0.0211295
93_LuCaP_58_LuCaP_NEPC_0.50_TF0.05	0.5	0.05	0.00561188	0.0443881
208-4_LuCaP_35CR_LuCaP_NEPC_0.70_TF0.20	0.7	0.2	0.0726471	0.127353
93_LuCaP_35_LuCaP_NEPC_0.70_TF0.10	0.7	0.1	0.0136439	0.0863561
93_LuCaP_35_LuCaP_NEPC_0.50_TF0.03	0.5	0.03	0.00366373	0.0263363
208-4_LuCaP_92_LuCaP_NEPC_0.70_TF0.01	0.7	0.01	0.00148002	0.00851998
49_LuCaP_136CR_LuCaP_NEPC_0.10_TF0.30	0.1	0.3	0.155207	0.144793
49_LuCaP_58_LuCaP_NEPC_0.50_TF0.30	0.5	0.3	0.0829311	0.217069
93_LuCaP_35CR_LuCaP_NEPC_0.70_TF0.20	0.7	0.2	0.0350464	0.164954
49_LuCaP_58_LuCaP_NEPC_0.70_TF0.05	0.7	0.05	0.00875809	0.0412419
173-1_LuCaP_136CR_LuCaP_NEPC_0.10_TF0.01	0.1	0.01	0.00287807	0.00712193
93_LuCaP_35CR_LuCaP_NEPC_0.90_TF0.30	0.9	0.3	0	0.3
49_LuCaP_58_LuCaP_NEPC_0.70_TF0.20	0.7	0.2	0.0324579	0.167542
173-1_LuCaP_136CR_LuCaP_NEPC_0.50_TF0.30	0.5	0.3	0.102594	0.197406
49_LuCaP_35_LuCaP_NEPC_0.10_TF0.30	0.1	0.3	0.192117	0.107883
93_LuCaP_35_LuCaP_NEPC_0.10_TF0.20	0.1	0.2	0.0855453	0.114455
145-2_LuCaP_136CR_LuCaP_NEPC_0.30_TF0.05	0.3	0.05	0.00870629	0.0412937
173-1_LuCaP_35_LuCaP_NEPC_0.30_TF0.03	0.3	0.03	0.00666412	0.0233359
93_LuCaP_XX_LuCaP_NEPC_1.0_TF0.03	1	0.03	0.000255364	0.0297446
145-2_LuCaP_136CR_LuCaP_NEPC_0.30_TF0.03	0.3	0.03	0.00533652	0.0246635
49_LuCaP_35CR_LuCaP_NEPC_0.50_TF0.20	0.5	0.2	0.099622	0.100378
93_LuCaP_136CR_LuCaP_NEPC_0.50_TF0.03	0.5	0.03	0.00965748	0.0203425
173-1_LuCaP_136CR_LuCaP_NEPC_0.30_TF0.30	0.3	0.3	0.0707329	0.229267
93_LuCaP_92_LuCaP_NEPC_0.10_TF0.20	0.1	0.2	0.070107	0.129893
49_LuCaP_136CR_LuCaP_NEPC_0.30_TF0.30	0.3	0.3	0.0953549	0.204645
173-1_LuCaP_136CR_LuCaP_NEPC_0.90_TF0.01	0.9	0.01	0.00228365	0.00771635
49_LuCaP_35CR_LuCaP_NEPC_0.10_TF0.01	0.1	0.01	0.00304139	0.00695861
49_LuCaP_58_LuCaP_NEPC_0.70_TF0.03	0.7	0.03	0.00405831	0.0259417
208-4_LuCaP_58_LuCaP_NEPC_0.90_TF0.01	0.9	0.01	0.00137858	0.00862142
49_LuCaP_58_LuCaP_NEPC_0.50_TF0.20	0.5	0.2	0.0642145	0.135785
49_LuCaP_35CR_LuCaP_NEPC_0.50_TF0.03	0.5	0.03	0.0096717	0.0203283
173-1_LuCaP_136CR_LuCaP_NEPC_0.50_TF0.20	0.5	0.2	0.0530057	0.146994
208-4_LuCaP_35CR_LuCaP_NEPC_0.30_TF0.10	0.3	0.1	0.0314668	0.0685332
49_LuCaP_35_LuCaP_NEPC_0.90_TF0.20	0.9	0.2	0.0629649	0.137035
173-1_LuCaP_35_LuCaP_NEPC_0.90_TF0.10	0.9	0.1	0.0219968	0.0780032
93_LuCaP_58_LuCaP_NEPC_0.10_TF0.05	0.1	0.05	0.0071407	0.0428593
208-4_LuCaP_92_LuCaP_NEPC_0.30_TF0.01	0.3	0.01	0.00147917	0.00852083
145-2_LuCaP_136CR_LuCaP_NEPC_0.10_TF0.05	0.1	0.05	0.0156071	0.0343929
145-2_LuCaP_35_LuCaP_NEPC_0.30_TF0.01	0.3	0.01	0.00272799	0.00727201
93_LuCaP_58_LuCaP_NEPC_0.90_TF0.03	0.9	0.03	0.00466072	0.0253393
208-4_LuCaP_35_LuCaP_NEPC_0.10_TF0.03	0.1	0.03	0.0064032	0.0235968
93_LuCaP_35_LuCaP_NEPC_0.70_TF0.20	0.7	0.2	0.0268166	0.173183
208-4_LuCaP_35_LuCaP_NEPC_0.70_TF0.03	0.7	0.03	0.00639335	0.0236066
93_LuCaP_35_LuCaP_NEPC_0.30_TF0.01	0.3	0.01	0.0015261	0.0084739
136CR_LuCaP_XX_LuCaP_NEPC_0.0_TF0.10	0	0.1	0.0522326	0.0477674
145-2_LuCaP_58_LuCaP_NEPC_0.90_TF0.20	0.9	0.2	0.0238538	0.176146
173-1_LuCaP_136CR_LuCaP_NEPC_0.30_TF0.05	0.3	0.05	0.0160166	0.0339834
49_LuCaP_XX_LuCaP_NEPC_1.0_TF0.03	1	0.03	0.00213657	0.0278634
173-1_LuCaP_92_LuCaP_NEPC_0.50_TF0.03	0.5	0.03	0.00438319	0.0256168
49_LuCaP_136CR_LuCaP_NEPC_0.90_TF0.03	0.9	0.03	0.010317	0.019683
173-1_LuCaP_XX_LuCaP_NEPC_1.0_TF0.05	1	0.05	0.000754519	0.0492455
93_LuCaP_35CR_LuCaP_NEPC_0.30_TF0.03	0.3	0.03	0.00450868	0.0254913
173-1_LuCaP_136CR_LuCaP_NEPC_0.30_TF0.20	0.3	0.2	0.0531868	0.146813
208-4_LuCaP_58_LuCaP_NEPC_0.70_TF0.01	0.7	0.01	0.000766052	0.00923395
58_LuCaP_XX_LuCaP_NEPC_0.0_TF0.05	0	0.05	0.0190715	0.0309285
49_LuCaP_58_LuCaP_NEPC_0.10_TF0.10	0.1	0.1	0.030161	0.069839
173-1_LuCaP_58_LuCaP_NEPC_0.30_TF0.10	0.3	0.1	0.0231259	0.0768741
208-4_LuCaP_92_LuCaP_NEPC_0.70_TF0.05	0.7	0.05	0.00806588	0.0419341
93_LuCaP_35CR_LuCaP_NEPC_0.30_TF0.05	0.3	0.05	0.00821045	0.0417895
208-4_LuCaP_35CR_LuCaP_NEPC_0.10_TF0.30	0.1	0.3	0.186908	0.113092
208-4_LuCaP_35CR_LuCaP_NEPC_0.30_TF0.20	0.3	0.2	0.0824096	0.11759
49_LuCaP_92_LuCaP_NEPC_0.10_TF0.10	0.1	0.1	0.0341085	0.0658915
173-1_LuCaP_92_LuCaP_NEPC_0.70_TF0.03	0.7	0.03	0.00441594	0.0255841
93_LuCaP_58_LuCaP_NEPC_0.90_TF0.20	0.9	0.2	0.0164418	0.183558
173-1_LuCaP_58_LuCaP_NEPC_0.50_TF0.20	0.5	0.2	0.0562503	0.14375
145-2_LuCaP_35_LuCaP_NEPC_0.10_TF0.01	0.1	0.01	0.00272371	0.00727629
173-1_LuCaP_35_LuCaP_NEPC_0.90_TF0.20	0.9	0.2	0.02609	0.17391
208-4_LuCaP_35_LuCaP_NEPC_0.70_TF0.01	0.7	0.01	0.00213629	0.00786371
145-2_LuCaP_35CR_LuCaP_NEPC_0.50_TF0.01	0.5	0.01	0.00292061	0.00707939
208-4_LuCaP_35_LuCaP_NEPC_0.50_TF0.20	0.5	0.2	0.0644969	0.135503
145-2_LuCaP_92_LuCaP_NEPC_0.90_TF0.03	0.9	0.03	0.00531853	0.0246815
145-2_LuCaP_136CR_LuCaP_NEPC_0.90_TF0.03	0.9	0.03	0.00978417	0.0202158
173-1_LuCaP_136CR_LuCaP_NEPC_0.70_TF0.20	0.7	0.2	0.0412831	0.158717
93_LuCaP_35_LuCaP_NEPC_0.50_TF0.10	0.5	0.1	0.0136747	0.0863253
145-2_LuCaP_35_LuCaP_NEPC_0.70_TF0.30	0.7	0.3	0.123209	0.176791
145-2_LuCaP_58_LuCaP_NEPC_0.10_TF0.05	0.1	0.05	0.0143714	0.0356286
145-2_LuCaP_35CR_LuCaP_NEPC_0.10_TF0.05	0.1	0.05	0.0180142	0.0319858
35CR_LuCaP_XX_LuCaP_NEPC_0.0_TF0.20	0	0.2	0.133028	0.0669723
49_LuCaP_58_LuCaP_NEPC_0.90_TF0.03	0.9	0.03	0.00668138	0.0233186
208-4_LuCaP_92_LuCaP_NEPC_0.50_TF0.10	0.5	0.1	0.0149216	0.0850784
173-1_LuCaP_92_LuCaP_NEPC_0.30_TF0.10	0.3	0.1	0.0159536	0.0840464
145-2_LuCaP_58_LuCaP_NEPC_0.30_TF0.20	0.3	0.2	0.0720659	0.127934
208-4_LuCaP_58_LuCaP_NEPC_0.50_TF0.30	0.5	0.3	0.0507386	0.249261
49_LuCaP_136CR_LuCaP_NEPC_0.50_TF0.30	0.5	0.3	0.143619	0.156381
145-2_LuCaP_35CR_LuCaP_NEPC_0.10_TF0.10	0.1	0.1	0.0440415	0.0559585
93_LuCaP_92_LuCaP_NEPC_0.90_TF0.20	0.9	0.2	0.00906127	0.190939
92_LuCaP_XX_LuCaP_NEPC_0.0_TF0.10	0	0.1	0.0554721	0.0445279
208-4_LuCaP_35CR_LuCaP_NEPC_0.50_TF0.01	0.5	0.01	0.0024248	0.0075752
49_LuCaP_136CR_LuCaP_NEPC_0.30_TF0.20	0.3	0.2	0.0735576	0.126442
145-2_LuCaP_35CR_LuCaP_NEPC_0.90_TF0.05	0.9	0.05	0.00904373	0.0409563
208-4_LuCaP_58_LuCaP_NEPC_0.90_TF0.30	0.9	0.3	0	0.3
208-4_LuCaP_35CR_LuCaP_NEPC_0.70_TF0.03	0.7	0.03	0.00731194	0.0226881
173-1_LuCaP_136CR_LuCaP_NEPC_0.50_TF0.03	0.5	0.03	0.00724995	0.0227501
93_LuCaP_136CR_LuCaP_NEPC_0.50_TF0.10	0.5	0.1	0.0382893	0.0617107
173-1_LuCaP_92_LuCaP_NEPC_0.70_TF0.30	0.7	0.3	0.0603432	0.239657
49_LuCaP_35_LuCaP_NEPC_0.50_TF0.10	0.5	0.1	0.0417204	0.0582796
173-1_LuCaP_136CR_LuCaP_NEPC_0.90_TF0.30	0.9	0.3	0.0154197	0.28458
208-4_LuCaP_58_LuCaP_NEPC_0.50_TF0.05	0.5	0.05	0.00835488	0.0416451
145-2_LuCaP_35CR_LuCaP_NEPC_0.70_TF0.30	0.7	0.3	0.128387	0.171613
173-1_LuCaP_35CR_LuCaP_NEPC_0.70_TF0.05	0.7	0.05	0.0129739	0.0370261
49_LuCaP_92_LuCaP_NEPC_0.90_TF0.20	0.9	0.2	0.0465679	0.153432
145-2_LuCaP_58_LuCaP_NEPC_0.50_TF0.20	0.5	0.2	0.0658505	0.134149
93_LuCaP_92_LuCaP_NEPC_0.10_TF0.01	0.1	0.01	0.00100883	0.00899117
49_LuCaP_92_LuCaP_NEPC_0.30_TF0.05	0.3	0.05	0.0142332	0.0357668
145-2_LuCaP_92_LuCaP_NEPC_0.50_TF0.30	0.5	0.3	0.110299	0.189701
49_LuCaP_136CR_LuCaP_NEPC_0.70_TF0.03	0.7	0.03	0.0103052	0.0196948
93_LuCaP_35CR_LuCaP_NEPC_0.90_TF0.01	0.9	0.01	0.00107339	0.00892661
208-4_LuCaP_136CR_LuCaP_NEPC_0.90_TF0.20	0.9	0.2	0.00414901	0.195851
93_LuCaP_58_LuCaP_NEPC_0.70_TF0.30	0.7	0.3	0.000752525	0.299247
49_LuCaP_92_LuCaP_NEPC_0.70_TF0.20	0.7	0.2	0.0844405	0.11556
145-2_LuCaP_35_LuCaP_NEPC_0.70_TF0.10	0.7	0.1	0.036965	0.063035
93_LuCaP_35CR_LuCaP_NEPC_0.70_TF0.10	0.7	0.1	0.016994	0.083006
173-1_LuCaP_136CR_LuCaP_NEPC_0.70_TF0.05	0.7	0.05	0.0119888	0.0380112
93_LuCaP_35CR_LuCaP_NEPC_0.10_TF0.20	0.1	0.2	0.0893266	0.110673
208-4_LuCaP_92_LuCaP_NEPC_0.50_TF0.20	0.5	0.2	0.0420205	0.15798
93_LuCaP_XX_LuCaP_NEPC_1.0_TF0.01	1	0.01	0.00120953	0.00879047
173-1_LuCaP_58_LuCaP_NEPC_0.10_TF0.30	0.1	0.3	0.103244	0.196756
173-1_LuCaP_92_LuCaP_NEPC_0.90_TF0.30	0.9	0.3	0.0144535	0.285546
93_LuCaP_136CR_LuCaP_NEPC_0.50_TF0.30	0.5	0.3	0.150206	0.149794
173-1_LuCaP_58_LuCaP_NEPC_0.30_TF0.01	0.3	0.01	0.000719387	0.00928061
173-1_LuCaP_35CR_LuCaP_NEPC_0.50_TF0.20	0.5	0.2	0.0634659	0.136534
93_LuCaP_136CR_LuCaP_NEPC_0.90_TF0.01	0.9	0.01	0.000939955	0.00906005
173-1_LuCaP_136CR_LuCaP_NEPC_0.10_TF0.30	0.1	0.3	0.142656	0.157344
173-1_LuCaP_136CR_LuCaP_NEPC_0.90_TF0.20	0.9	0.2	0.0169466	0.183053
49_LuCaP_35_LuCaP_NEPC_0.30_TF0.01	0.3	0.01	0.00285921	0.00714079
93_LuCaP_35_LuCaP_NEPC_0.50_TF0.05	0.5	0.05	0.00652011	0.0434799
49_LuCaP_35_LuCaP_NEPC_0.10_TF0.05	0.1	0.05	0.0177547	0.0322453
93_LuCaP_92_LuCaP_NEPC_0.90_TF0.03	0.9	0.03	0.00690571	0.0230943
208-4_LuCaP_136CR_LuCaP_NEPC_0.90_TF0.05	0.9	0.05	0.0068425	0.0431575
145-2_LuCaP_35CR_LuCaP_NEPC_0.30_TF0.01	0.3	0.01	0.00291238	0.00708762
208-4_LuCaP_35_LuCaP_NEPC_0.90_TF0.01	0.9	0.01	0.00126822	0.00873178
136CR_LuCaP_XX_LuCaP_NEPC_0.0_TF0.20	0	0.2	0.135174	0.0648264
208-4_LuCaP_35_LuCaP_NEPC_0.30_TF0.05	0.3	0.05	0.0122749	0.0377251
145-2_LuCaP_136CR_LuCaP_NEPC_0.10_TF0.01	0.1	0.01	0.00239524	0.00760476
145-2_LuCaP_136CR_LuCaP_NEPC_0.30_TF0.30	0.3	0.3	0.0911402	0.20886
92_LuCaP_XX_LuCaP_NEPC_0.0_TF0.01	0	0.01	0.00213798	0.00786202
208-4_LuCaP_136CR_LuCaP_NEPC_0.70_TF0.03	0.7	0.03	0.00473019	0.0252698
173-1_LuCaP_35CR_LuCaP_NEPC_0.50_TF0.10	0.5	0.1	0.0264432	0.0735568
49_LuCaP_136CR_LuCaP_NEPC_0.90_TF0.10	0.9	0.1	0.030639	0.069361
93_LuCaP_58_LuCaP_NEPC_0.30_TF0.05	0.3	0.05	0.00454211	0.0454579
208-4_LuCaP_92_LuCaP_NEPC_0.50_TF0.03	0.5	0.03	0.00356813	0.0264319
93_LuCaP_92_LuCaP_NEPC_0.30_TF0.20	0.3	0.2	0.0235044	0.176496
49_LuCaP_136CR_LuCaP_NEPC_0.70_TF0.05	0.7	0.05	0.0192101	0.0307899
49_LuCaP_92_LuCaP_NEPC_0.70_TF0.30	0.7	0.3	0.11888	0.18112
93_LuCaP_35CR_LuCaP_NEPC_0.70_TF0.01	0.7	0.01	0.0017881	0.0082119
49_LuCaP_35_LuCaP_NEPC_0.50_TF0.01	0.5	0.01	0.00285469	0.00714531
173-1_LuCaP_35_LuCaP_NEPC_0.90_TF0.05	0.9	0.05	0.0115066	0.0384934
173-1_LuCaP_35_LuCaP_NEPC_0.10_TF0.30	0.1	0.3	0.182104	0.117896
208-4_LuCaP_35_LuCaP_NEPC_0.70_TF0.20	0.7	0.2	0.064752	0.135248
49_LuCaP_92_LuCaP_NEPC_0.50_TF0.10	0.5	0.1	0.030991	0.069009
49_LuCaP_136CR_LuCaP_NEPC_0.30_TF0.10	0.3	0.1	0.0340917	0.0659083
208-4_LuCaP_136CR_LuCaP_NEPC_0.90_TF0.01	0.9	0.01	0.00167975	0.00832025
93_LuCaP_92_LuCaP_NEPC_0.50_TF0.01	0.5	0.01	0.00102938	0.00897062
49_LuCaP_35_LuCaP_NEPC_0.70_TF0.03	0.7	0.03	0.0089892	0.0210108
145-2_LuCaP_35_LuCaP_NEPC_0.10_TF0.03	0.1	0.03	0.00890311	0.0210969
93_LuCaP_136CR_LuCaP_NEPC_0.30_TF0.03	0.3	0.03	0.00689464	0.0231054
208-4_LuCaP_136CR_LuCaP_NEPC_0.30_TF0.05	0.3	0.05	0.0175567	0.0324433
208-4_LuCaP_136CR_LuCaP_NEPC_0.10_TF0.30	0.1	0.3	0.200332	0.0996681
145-2_LuCaP_58_LuCaP_NEPC_0.90_TF0.30	0.9	0.3	0.0321805	0.267819
208-4_LuCaP_58_LuCaP_NEPC_0.30_TF0.05	0.3	0.05	0.00671841	0.0432816
173-1_LuCaP_58_LuCaP_NEPC_0.30_TF0.03	0.3	0.03	0.00391327	0.0260867
173-1_LuCaP_35CR_LuCaP_NEPC_0.70_TF0.10	0.7	0.1	0.0264255	0.0735745
49_LuCaP_92_LuCaP_NEPC_0.50_TF0.03	0.5	0.03	0.00597712	0.0240229
208-4_LuCaP_58_LuCaP_NEPC_0.90_TF0.05	0.9	0.05	0.000454373	0.0495456
145-2_LuCaP_58_LuCaP_NEPC_0.10_TF0.30	0.1	0.3	0.144181	0.155819
58_LuCaP_XX_LuCaP_NEPC_0.0_TF0.01	0	0.01	0.00228411	0.00771589
49_LuCaP_92_LuCaP_NEPC_0.50_TF0.05	0.5	0.05	0.0142253	0.0357747
145-2_LuCaP_92_LuCaP_NEPC_0.30_TF0.01	0.3	0.01	0.00211016	0.00788984
93_LuCaP_58_LuCaP_NEPC_0.50_TF0.03	0.5	0.03	0.00284103	0.027159
173-1_LuCaP_136CR_LuCaP_NEPC_0.90_TF0.05	0.9	0.05	0.0119065	0.0380935
93_LuCaP_58_LuCaP_NEPC_0.50_TF0.20	0.5	0.2	0.0267887	0.173211
145-2_LuCaP_35CR_LuCaP_NEPC_0.30_TF0.10	0.3	0.1	0.0384944	0.0615056
49_LuCaP_35_LuCaP_NEPC_0.50_TF0.05	0.5	0.05	0.017893	0.032107
208-4_LuCaP_35CR_LuCaP_NEPC_0.10_TF0.20	0.1	0.2	0.114208	0.0857922
173-1_LuCaP_58_LuCaP_NEPC_0.70_TF0.05	0.7	0.05	0.00598398	0.044016
208-4_LuCaP_35CR_LuCaP_NEPC_0.50_TF0.20	0.5	0.2	0.0728378	0.127162
208-4_LuCaP_58_LuCaP_NEPC_0.70_TF0.03	0.7	0.03	0.00350794	0.0264921
93_LuCaP_58_LuCaP_NEPC_0.30_TF0.10	0.3	0.1	0.0115945	0.0884055
208-4_LuCaP_35CR_LuCaP_NEPC_0.90_TF0.20	0.9	0.2	0.0318882	0.168112
93_LuCaP_35_LuCaP_NEPC_0.10_TF0.03	0.1	0.03	0.00366482	0.0263352
93_LuCaP_35_LuCaP_NEPC_0.50_TF0.20	0.5	0.2	0.0269256	0.173074
49_LuCaP_92_LuCaP_NEPC_0.30_TF0.10	0.3	0.1	0.0309535	0.0690465
173-1_LuCaP_136CR_LuCaP_NEPC_0.70_TF0.03	0.7	0.03	0.00734267	0.0226573
145-2_LuCaP_136CR_LuCaP_NEPC_0.70_TF0.03	0.7	0.03	0.00928294	0.0207171
173-1_LuCaP_35CR_LuCaP_NEPC_0.30_TF0.30	0.3	0.3	0.142946	0.157054
49_LuCaP_35CR_LuCaP_NEPC_0.30_TF0.10	0.3	0.1	0.0432095	0.0567905
49_LuCaP_58_LuCaP_NEPC_0.70_TF0.30	0.7	0.3	0.0428205	0.257179
173-1_LuCaP_35_LuCaP_NEPC_0.30_TF0.10	0.3	0.1	0.0240018	0.0759982
208-4_LuCaP_136CR_LuCaP_NEPC_0.30_TF0.20	0.3	0.2	0.0434401	0.15656
49_LuCaP_92_LuCaP_NEPC_0.90_TF0.01	0.9	0.01	0.00218846	0.00781154
173-1_LuCaP_35CR_LuCaP_NEPC_0.30_TF0.20	0.3	0.2	0.0805552	0.119445
208-4_LuCaP_92_LuCaP_NEPC_0.90_TF0.05	0.9	0.05	0.00803481	0.0419652
208-4_LuCaP_35_LuCaP_NEPC_0.10_TF0.20	0.1	0.2	0.114305	0.085695
35CR_LuCaP_XX_LuCaP_NEPC_0.0_TF0.01	0	0.01	0.00292342	0.00707658
49_LuCaP_35_LuCaP_NEPC_0.50_TF0.03	0.5	0.03	0.00897377	0.0210262
173-1_LuCaP_35_LuCaP_NEPC_0.70_TF0.05	0.7	0.05	0.0115997	0.0384003
49_LuCaP_58_LuCaP_NEPC_0.70_TF0.10	0.7	0.1	0.0228405	0.0771595
93_LuCaP_92_LuCaP_NEPC_0.30_TF0.30	0.3	0.3	0.0592452	0.240755
49_LuCaP_35CR_LuCaP_NEPC_0.30_TF0.03	0.3	0.03	0.00968097	0.020319
145-2_LuCaP_35_LuCaP_NEPC_0.70_TF0.01	0.7	0.01	0.00272671	0.00727329
145-2_LuCaP_35CR_LuCaP_NEPC_0.30_TF0.30	0.3	0.3	0.152652	0.147348
208-4_LuCaP_92_LuCaP_NEPC_0.30_TF0.05	0.3	0.05	0.00806758	0.0419324
173-1_LuCaP_92_LuCaP_NEPC_0.10_TF0.05	0.1	0.05	0.0113507	0.0386493
173-1_LuCaP_136CR_LuCaP_NEPC_0.30_TF0.01	0.3	0.01	0.00257626	0.00742374
93_LuCaP_58_LuCaP_NEPC_0.90_TF0.05	0.9	0.05	0.00665895	0.0433411
49_LuCaP_35CR_LuCaP_NEPC_0.10_TF0.03	0.1	0.03	0.00962641	0.0203736
49_LuCaP_58_LuCaP_NEPC_0.70_TF0.01	0.7	0.01	0.000973629	0.00902637
93_LuCaP_92_LuCaP_NEPC_0.90_TF0.05	0.9	0.05	0.0122857	0.0377143
145-2_LuCaP_35CR_LuCaP_NEPC_0.90_TF0.20	0.9	0.2	0.0382508	0.161749
49_LuCaP_35_LuCaP_NEPC_0.90_TF0.03	0.9	0.03	0.00896196	0.021038
93_LuCaP_136CR_LuCaP_NEPC_0.90_TF0.10	0.9	0.1	0	0.1
208-4_LuCaP_35CR_LuCaP_NEPC_0.70_TF0.01	0.7	0.01	0.00242326	0.00757674
93_LuCaP_35CR_LuCaP_NEPC_0.30_TF0.01	0.3	0.01	0.00177816	0.00822184
145-2_LuCaP_136CR_LuCaP_NEPC_0.70_TF0.20	0.7	0.2	0.0577289	0.142271
173-1_LuCaP_XX_LuCaP_NEPC_1.0_TF0.30	1	0.3	0.00325052	0.296749
173-1_LuCaP_58_LuCaP_NEPC_0.70_TF0.03	0.7	0.03	0.00314276	0.0268572
173-1_LuCaP_35_LuCaP_NEPC_0.90_TF0.03	0.9	0.03	0.00664354	0.0233565
93_LuCaP_136CR_LuCaP_NEPC_0.30_TF0.20	0.3	0.2	0.0661299	0.13387
208-4_LuCaP_92_LuCaP_NEPC_0.70_TF0.30	0.7	0.3	0.0599587	0.240041
49_LuCaP_35CR_LuCaP_NEPC_0.70_TF0.05	0.7	0.05	0.0190028	0.0309972
173-1_LuCaP_35CR_LuCaP_NEPC_0.50_TF0.05	0.5	0.05	0.0129911	0.0370089
173-1_LuCaP_58_LuCaP_NEPC_0.70_TF0.30	0.7	0.3	0.0231513	0.276849
145-2_LuCaP_136CR_LuCaP_NEPC_0.50_TF0.20	0.5	0.2	0.0309817	0.169018
93_LuCaP_58_LuCaP_NEPC_0.30_TF0.01	0.3	0.01	0.000525359	0.00947464
145-2_LuCaP_35_LuCaP_NEPC_0.90_TF0.10	0.9	0.1	0.0274479	0.0725521
145-2_LuCaP_92_LuCaP_NEPC_0.70_TF0.20	0.7	0.2	0.069283	0.130717
49_LuCaP_58_LuCaP_NEPC_0.30_TF0.10	0.3	0.1	0.0240026	0.0759974
145-2_LuCaP_58_LuCaP_NEPC_0.90_TF0.05	0.9	0.05	0.00814731	0.0418527
208-4_LuCaP_35CR_LuCaP_NEPC_0.50_TF0.30	0.5	0.3	0.119839	0.180161
49_LuCaP_58_LuCaP_NEPC_0.10_TF0.01	0.1	0.01	0.00204791	0.00795209
173-1_LuCaP_58_LuCaP_NEPC_0.50_TF0.03	0.5	0.03	0.00487677	0.0251232
208-4_LuCaP_35CR_LuCaP_NEPC_0.90_TF0.03	0.9	0.03	0.00733744	0.0226626
145-2_LuCaP_136CR_LuCaP_NEPC_0.50_TF0.03	0.5	0.03	0.00532025	0.0246798
145-2_LuCaP_35CR_LuCaP_NEPC_0.50_TF0.30	0.5	0.3	0.136391	0.163609
208-4_LuCaP_136CR_LuCaP_NEPC_0.50_TF0.01	0.5	0.01	0.00191926	0.00808074
145-2_LuCaP_58_LuCaP_NEPC_0.30_TF0.01	0.3	0.01	0.00106519	0.00893481
173-1_LuCaP_92_LuCaP_NEPC_0.90_TF0.03	0.9	0.03	0.00444805	0.025552
49_LuCaP_136CR_LuCaP_NEPC_0.50_TF0.20	0.5	0.2	0.094497	0.105503
49_LuCaP_92_LuCaP_NEPC_0.10_TF0.05	0.1	0.05	0.0143352	0.0356648
208-4_LuCaP_92_LuCaP_NEPC_0.30_TF0.30	0.3	0.3	0.111927	0.188073
208-4_LuCaP_136CR_LuCaP_NEPC_0.30_TF0.30	0.3	0.3	0.0584138	0.241586
93_LuCaP_35CR_LuCaP_NEPC_0.10_TF0.03	0.1	0.03	0.00451341	0.0254866
49_LuCaP_XX_LuCaP_NEPC_1.0_TF0.30	1	0.3	0.00181834	0.298182
145-2_LuCaP_58_LuCaP_NEPC_0.70_TF0.01	0.7	0.01	0.00106519	0.00893481
208-4_LuCaP_92_LuCaP_NEPC_0.50_TF0.01	0.5	0.01	0.00148094	0.00851906
49_LuCaP_136CR_LuCaP_NEPC_0.10_TF0.05	0.1	0.05	0.00882881	0.0411712
173-1_LuCaP_35_LuCaP_NEPC_0.10_TF0.10	0.1	0.1	0.0405479	0.0594521
93_LuCaP_35_LuCaP_NEPC_0.30_TF0.20	0.3	0.2	0.0409884	0.159012
93_LuCaP_136CR_LuCaP_NEPC_0.10_TF0.05	0.1	0.05	0.0163119	0.0336881
208-4_LuCaP_35_LuCaP_NEPC_0.90_TF0.05	0.9	0.05	0	0.05
93_LuCaP_35_LuCaP_NEPC_0.50_TF0.01	0.5	0.01	0.0015233	0.0084767
173-1_LuCaP_136CR_LuCaP_NEPC_0.50_TF0.10	0.5	0.1	0.0216556	0.0783444
93_LuCaP_92_LuCaP_NEPC_0.70_TF0.03	0.7	0.03	0.00166176	0.0283382
49_LuCaP_58_LuCaP_NEPC_0.50_TF0.01	0.5	0.01	0.00135266	0.00864734
93_LuCaP_92_LuCaP_NEPC_0.50_TF0.05	0.5	0.05	0.00378543	0.0462146
145-2_LuCaP_92_LuCaP_NEPC_0.10_TF0.03	0.1	0.03	0.00632968	0.0236703
145-2_LuCaP_92_LuCaP_NEPC_0.90_TF0.01	0.9	0.01	0.00212102	0.00787898
208-4_LuCaP_35_LuCaP_NEPC_0.50_TF0.30	0.5	0.3	0.105859	0.194141
208-4_LuCaP_35CR_LuCaP_NEPC_0.30_TF0.30	0.3	0.3	0.148462	0.151538
173-1_LuCaP_58_LuCaP_NEPC_0.90_TF0.01	0.9	0.01	0.00158244	0.00841756
145-2_LuCaP_58_LuCaP_NEPC_0.70_TF0.20	0.7	0.2	0.0440846	0.155915
93_LuCaP_136CR_LuCaP_NEPC_0.30_TF0.30	0.3	0.3	0.128383	0.171617
93_LuCaP_136CR_LuCaP_NEPC_0.90_TF0.30	0.9	0.3	0	0.3
145-2_LuCaP_35CR_LuCaP_NEPC_0.50_TF0.10	0.5	0.1	0.0385555	0.0614445
145-2_LuCaP_35_LuCaP_NEPC_0.50_TF0.05	0.5	0.05	0.0170948	0.0329052
93_LuCaP_35_LuCaP_NEPC_0.90_TF0.20	0.9	0.2	0.0237823	0.176218
93_LuCaP_136CR_LuCaP_NEPC_0.50_TF0.05	0.5	0.05	0.0181288	0.0318712
93_LuCaP_35_LuCaP_NEPC_0.50_TF0.30	0.5	0.3	0.0562847	0.243715
145-2_LuCaP_58_LuCaP_NEPC_0.70_TF0.03	0.7	0.03	0.00547248	0.0245275
145-2_LuCaP_35CR_LuCaP_NEPC_0.90_TF0.30	0.9	0.3	0.0627156	0.237284
145-2_LuCaP_35_LuCaP_NEPC_0.90_TF0.30	0.9	0.3	0.0607179	0.239282
173-1_LuCaP_92_LuCaP_NEPC_0.90_TF0.20	0.9	0.2	0.0162525	0.183747
93_LuCaP_35CR_LuCaP_NEPC_0.30_TF0.30	0.3	0.3	0.099501	0.200499
93_LuCaP_92_LuCaP_NEPC_0.50_TF0.20	0.5	0.2	0.0123917	0.187608
93_LuCaP_136CR_LuCaP_NEPC_0.10_TF0.20	0.1	0.2	0.109388	0.0906116
208-4_LuCaP_58_LuCaP_NEPC_0.10_TF0.05	0.1	0.05	0.0106269	0.0393731
93_LuCaP_35_LuCaP_NEPC_0.90_TF0.30	0.9	0.3	0.0151046	0.284895
173-1_LuCaP_92_LuCaP_NEPC_0.10_TF0.01	0.1	0.01	0.00147423	0.00852577
49_LuCaP_35CR_LuCaP_NEPC_0.50_TF0.30	0.5	0.3	0.151159	0.148841
49_LuCaP_35CR_LuCaP_NEPC_0.90_TF0.30	0.9	0.3	0.074795	0.225205
93_LuCaP_35CR_LuCaP_NEPC_0.10_TF0.01	0.1	0.01	0.00178056	0.00821944
145-2_LuCaP_XX_LuCaP_NEPC_1.0_TF0.05	1	0.05	0.00503486	0.0449651
93_LuCaP_92_LuCaP_NEPC_0.10_TF0.03	0.1	0.03	0.00159305	0.028407
173-1_LuCaP_35CR_LuCaP_NEPC_0.10_TF0.01	0.1	0.01	0.00226378	0.00773622
208-4_LuCaP_58_LuCaP_NEPC_0.90_TF0.10	0.9	0.1	0	0.1
208-4_LuCaP_58_LuCaP_NEPC_0.70_TF0.05	0.7	0.05	0.00791317	0.0420868
173-1_LuCaP_92_LuCaP_NEPC_0.30_TF0.03	0.3	0.03	0.00443356	0.0255664
49_LuCaP_136CR_LuCaP_NEPC_0.70_TF0.01	0.7	0.01	0.00315969	0.00684031
145-2_LuCaP_35CR_LuCaP_NEPC_0.70_TF0.10	0.7	0.1	0.0386108	0.0613892
93_LuCaP_XX_LuCaP_NEPC_1.0_TF0.05	1	0.05	0	0.05
49_LuCaP_35_LuCaP_NEPC_0.50_TF0.30	0.5	0.3	0.144344	0.155656
49_LuCaP_136CR_LuCaP_NEPC_0.50_TF0.10	0.5	0.1	0.0404252	0.0595748
92_LuCaP_XX_LuCaP_NEPC_0.0_TF0.20	0	0.2	0.164814	0.0351863
208-4_LuCaP_92_LuCaP_NEPC_0.90_TF0.30	0.9	0.3	0	0.3
93_LuCaP_58_LuCaP_NEPC_0.10_TF0.01	0.1	0.01	0.00144913	0.00855087
208-4_LuCaP_136CR_LuCaP_NEPC_0.10_TF0.03	0.1	0.03	0.0103291	0.0196709
208-4_LuCaP_35CR_LuCaP_NEPC_0.70_TF0.30	0.7	0.3	0.0995458	0.200454
173-1_LuCaP_92_LuCaP_NEPC_0.30_TF0.05	0.3	0.05	0.00869945	0.0413006
35_LuCaP_XX_LuCaP_NEPC_0.0_TF0.03	0	0.03	0.0110765	0.0189235
93_LuCaP_35_LuCaP_NEPC_0.70_TF0.01	0.7	0.01	0.00152259	0.00847741
49_LuCaP_136CR_LuCaP_NEPC_0.90_TF0.05	0.9	0.05	0.0192449	0.0307551
49_LuCaP_92_LuCaP_NEPC_0.10_TF0.01	0.1	0.01	0.00219075	0.00780925
173-1_LuCaP_XX_LuCaP_NEPC_1.0_TF0.20	1	0.2	0.00628525	0.193715
208-4_LuCaP_XX_LuCaP_NEPC_1.0_TF0.20	1	0.2	0	0.2
93_LuCaP_136CR_LuCaP_NEPC_0.70_TF0.10	0.7	0.1	0.0195066	0.0804934
49_LuCaP_136CR_LuCaP_NEPC_0.10_TF0.01	0.1	0.01	0.00197714	0.00802286
173-1_LuCaP_35CR_LuCaP_NEPC_0.10_TF0.05	0.1	0.05	0.0157722	0.0342278
173-1_LuCaP_35_LuCaP_NEPC_0.30_TF0.30	0.3	0.3	0.134256	0.165744
145-2_LuCaP_35CR_LuCaP_NEPC_0.10_TF0.03	0.1	0.03	0.00938402	0.020616
173-1_LuCaP_35CR_LuCaP_NEPC_0.30_TF0.05	0.3	0.05	0.0130119	0.0369881
93_LuCaP_35_LuCaP_NEPC_0.70_TF0.05	0.7	0.05	0.00649816	0.0435018
145-2_LuCaP_35_LuCaP_NEPC_0.50_TF0.20	0.5	0.2	0.0828711	0.117129
49_LuCaP_35_LuCaP_NEPC_0.70_TF0.30	0.7	0.3	0.13684	0.16316
93_LuCaP_58_LuCaP_NEPC_0.30_TF0.20	0.3	0.2	0.0327119	0.167288
173-1_LuCaP_35CR_LuCaP_NEPC_0.10_TF0.03	0.1	0.03	0.00734128	0.0226587
93_LuCaP_35_LuCaP_NEPC_0.30_TF0.30	0.3	0.3	0.0864563	0.213544
145-2_LuCaP_92_LuCaP_NEPC_0.70_TF0.03	0.7	0.03	0.00642389	0.0235761
93_LuCaP_58_LuCaP_NEPC_0.10_TF0.20	0.1	0.2	0.039307	0.160693
145-2_LuCaP_136CR_LuCaP_NEPC_0.90_TF0.30	0.9	0.3	0.125626	0.174374
49_LuCaP_92_LuCaP_NEPC_0.10_TF0.30	0.1	0.3	0.191175	0.108825
208-4_LuCaP_35CR_LuCaP_NEPC_0.10_TF0.05	0.1	0.05	0.0144111	0.0355889
208-4_LuCaP_92_LuCaP_NEPC_0.70_TF0.20	0.7	0.2	0.0422246	0.157775
145-2_LuCaP_XX_LuCaP_NEPC_1.0_TF0.20	1	0.2	0.0233705	0.17663
145-2_LuCaP_35_LuCaP_NEPC_0.90_TF0.05	0.9	0.05	0.0143241	0.0356759
145-2_LuCaP_58_LuCaP_NEPC_0.90_TF0.03	0.9	0.03	0.00611138	0.0238886
93_LuCaP_35_LuCaP_NEPC_0.30_TF0.03	0.3	0.03	0.00365229	0.0263477
208-4_LuCaP_92_LuCaP_NEPC_0.10_TF0.10	0.1	0.1	0.0267824	0.0732176
49_LuCaP_35CR_LuCaP_NEPC_0.10_TF0.05	0.1	0.05	0.0190088	0.0309912
93_LuCaP_136CR_LuCaP_NEPC_0.30_TF0.10	0.3	0.1	0.0231431	0.0768569
49_LuCaP_58_LuCaP_NEPC_0.50_TF0.10	0.5	0.1	0.0281067	0.0718933
145-2_LuCaP_35CR_LuCaP_NEPC_0.10_TF0.01	0.1	0.01	0.00290569	0.00709431
93_LuCaP_92_LuCaP_NEPC_0.90_TF0.30	0.9	0.3	0	0.3
173-1_LuCaP_35_LuCaP_NEPC_0.50_TF0.03	0.5	0.03	0.00662349	0.0233765
173-1_LuCaP_92_LuCaP_NEPC_0.30_TF0.01	0.3	0.01	0.00147947	0.00852053
145-2_LuCaP_92_LuCaP_NEPC_0.30_TF0.20	0.3	0.2	0.0725686	0.127431
208-4_LuCaP_58_LuCaP_NEPC_0.90_TF0.20	0.9	0.2	0	0.2
93_LuCaP_136CR_LuCaP_NEPC_0.50_TF0.01	0.5	0.01	0.00294732	0.00705268
208-4_LuCaP_35CR_LuCaP_NEPC_0.70_TF0.10	0.7	0.1	0.0314209	0.0685791
208-4_LuCaP_XX_LuCaP_NEPC_1.0_TF0.05	1	0.05	0	0.05
173-1_LuCaP_35CR_LuCaP_NEPC_0.90_TF0.05	0.9	0.05	0.0129379	0.0370621
92_LuCaP_XX_LuCaP_NEPC_0.0_TF0.30	0	0.3	0.233482	0.0665179
49_LuCaP_35_LuCaP_NEPC_0.30_TF0.30	0.3	0.3	0.156364	0.143636
173-1_LuCaP_35CR_LuCaP_NEPC_0.70_TF0.03	0.7	0.03	0.00733066	0.0226693
93_LuCaP_35_LuCaP_NEPC_0.70_TF0.30	0.7	0.3	0.0382545	0.261745
49_LuCaP_58_LuCaP_NEPC_0.30_TF0.01	0.3	0.01	0.000953376	0.00904662
